# Supplementary material
Source: PubMed Central journal article supplement (PMC3719175)

**Supporting Information for:**

**Preparation of *anti*-Vicinal Amino Alcohols: Asymmetric Synthesis of *D-erythro*-Sphinganine,  
(+)-Spisulosine and *D-ribo*-Phytosphingosine**

*Ewen D. D. Calder, Ahmed M. Zaed and Andrew Sutherland\**

WestCHEM, School of Chemistry, The Joseph Black Building, University of Glasgow, Glasgow  
G12 8QQ, United Kingdom. Email: Andrew.Sutherland@glasgow.ac.uk

**Table of Contents**

|                                                                          |        |
|--------------------------------------------------------------------------|--------|
| 1. $^1\text{H}$ NMR and $^{13}\text{C}$ NMR Spectra of All New Compounds | S2-S53 |
|--------------------------------------------------------------------------|--------|

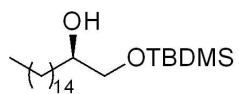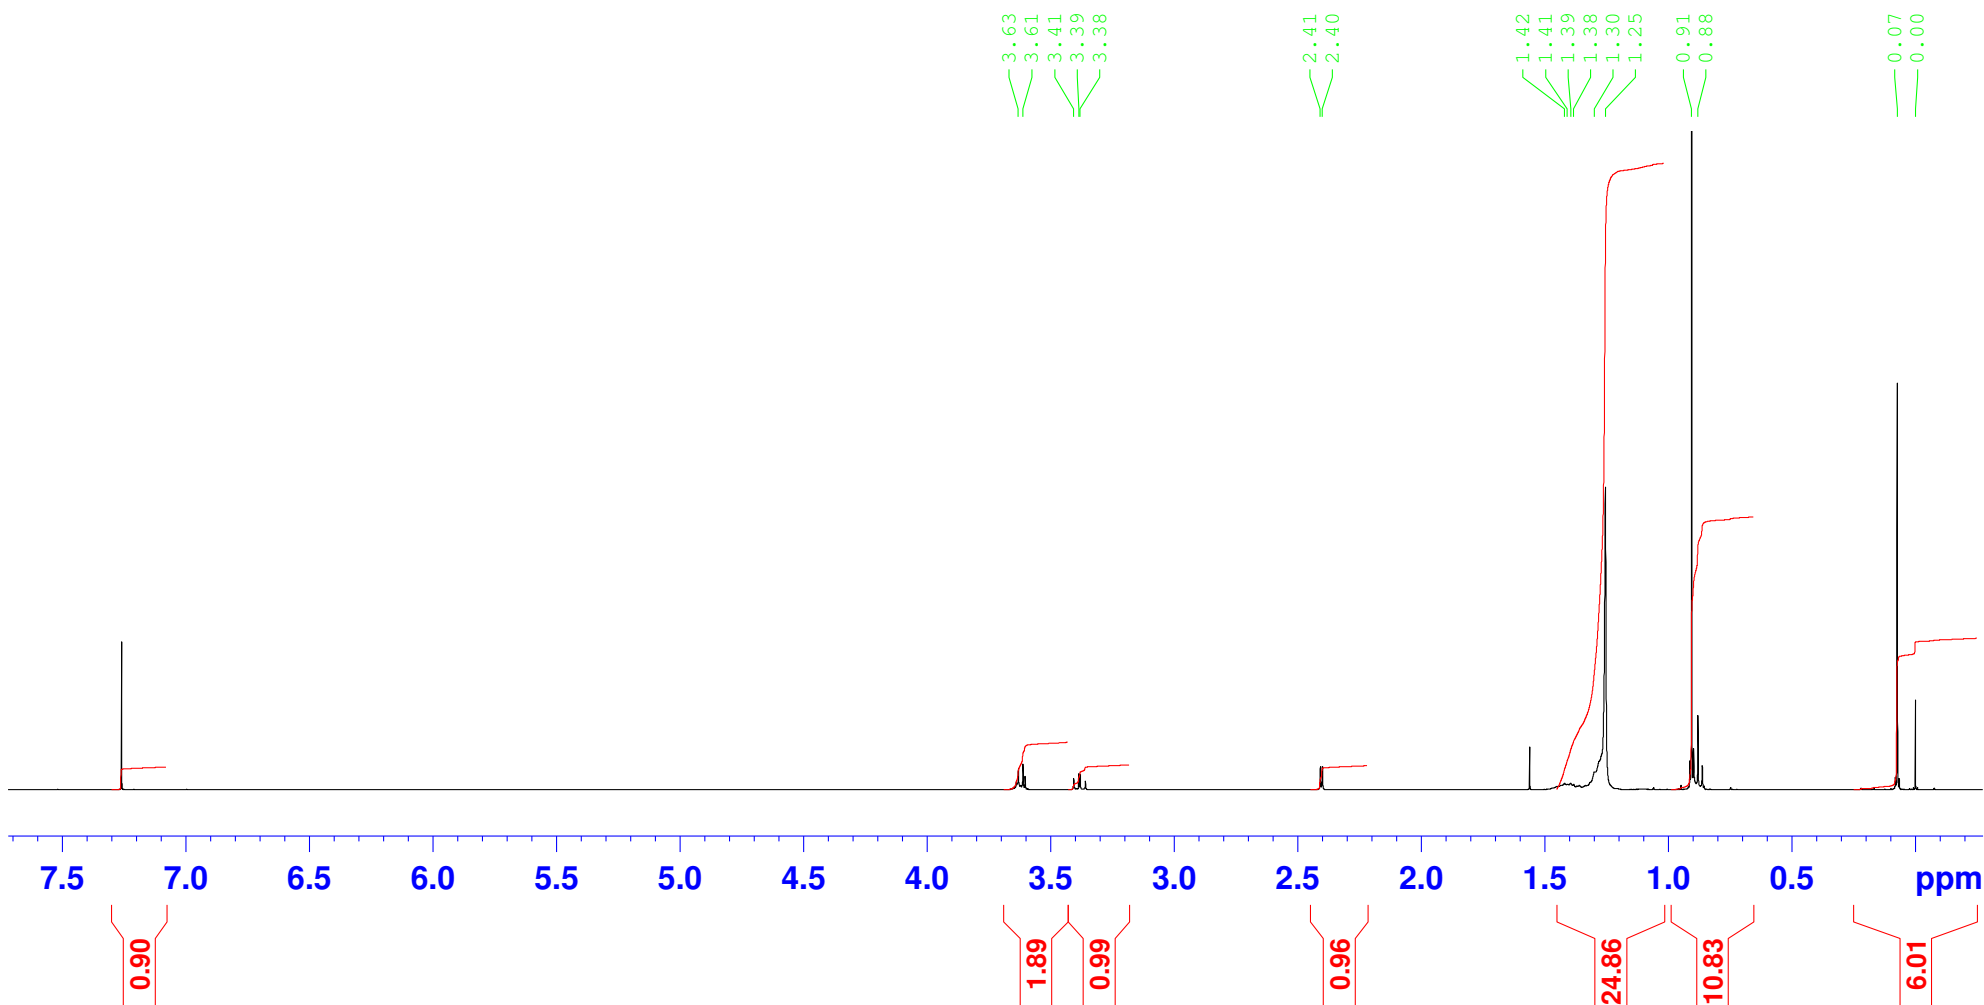

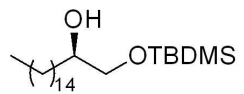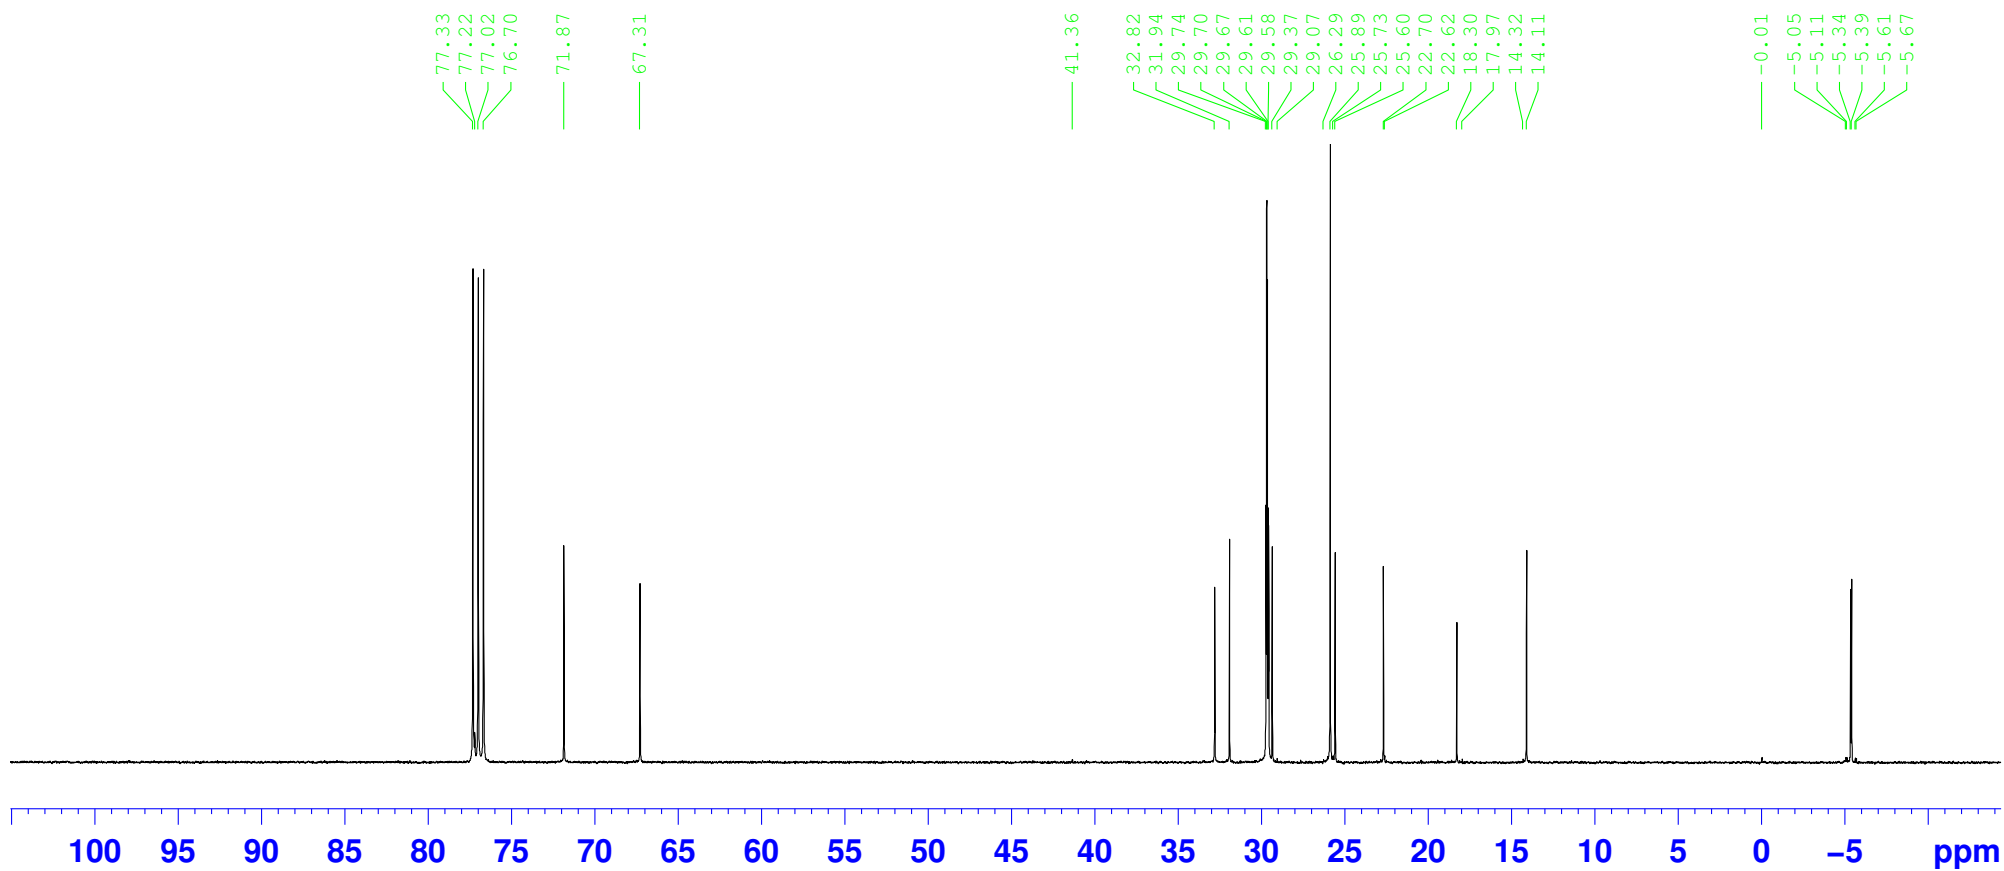



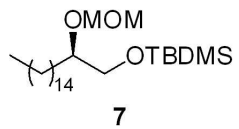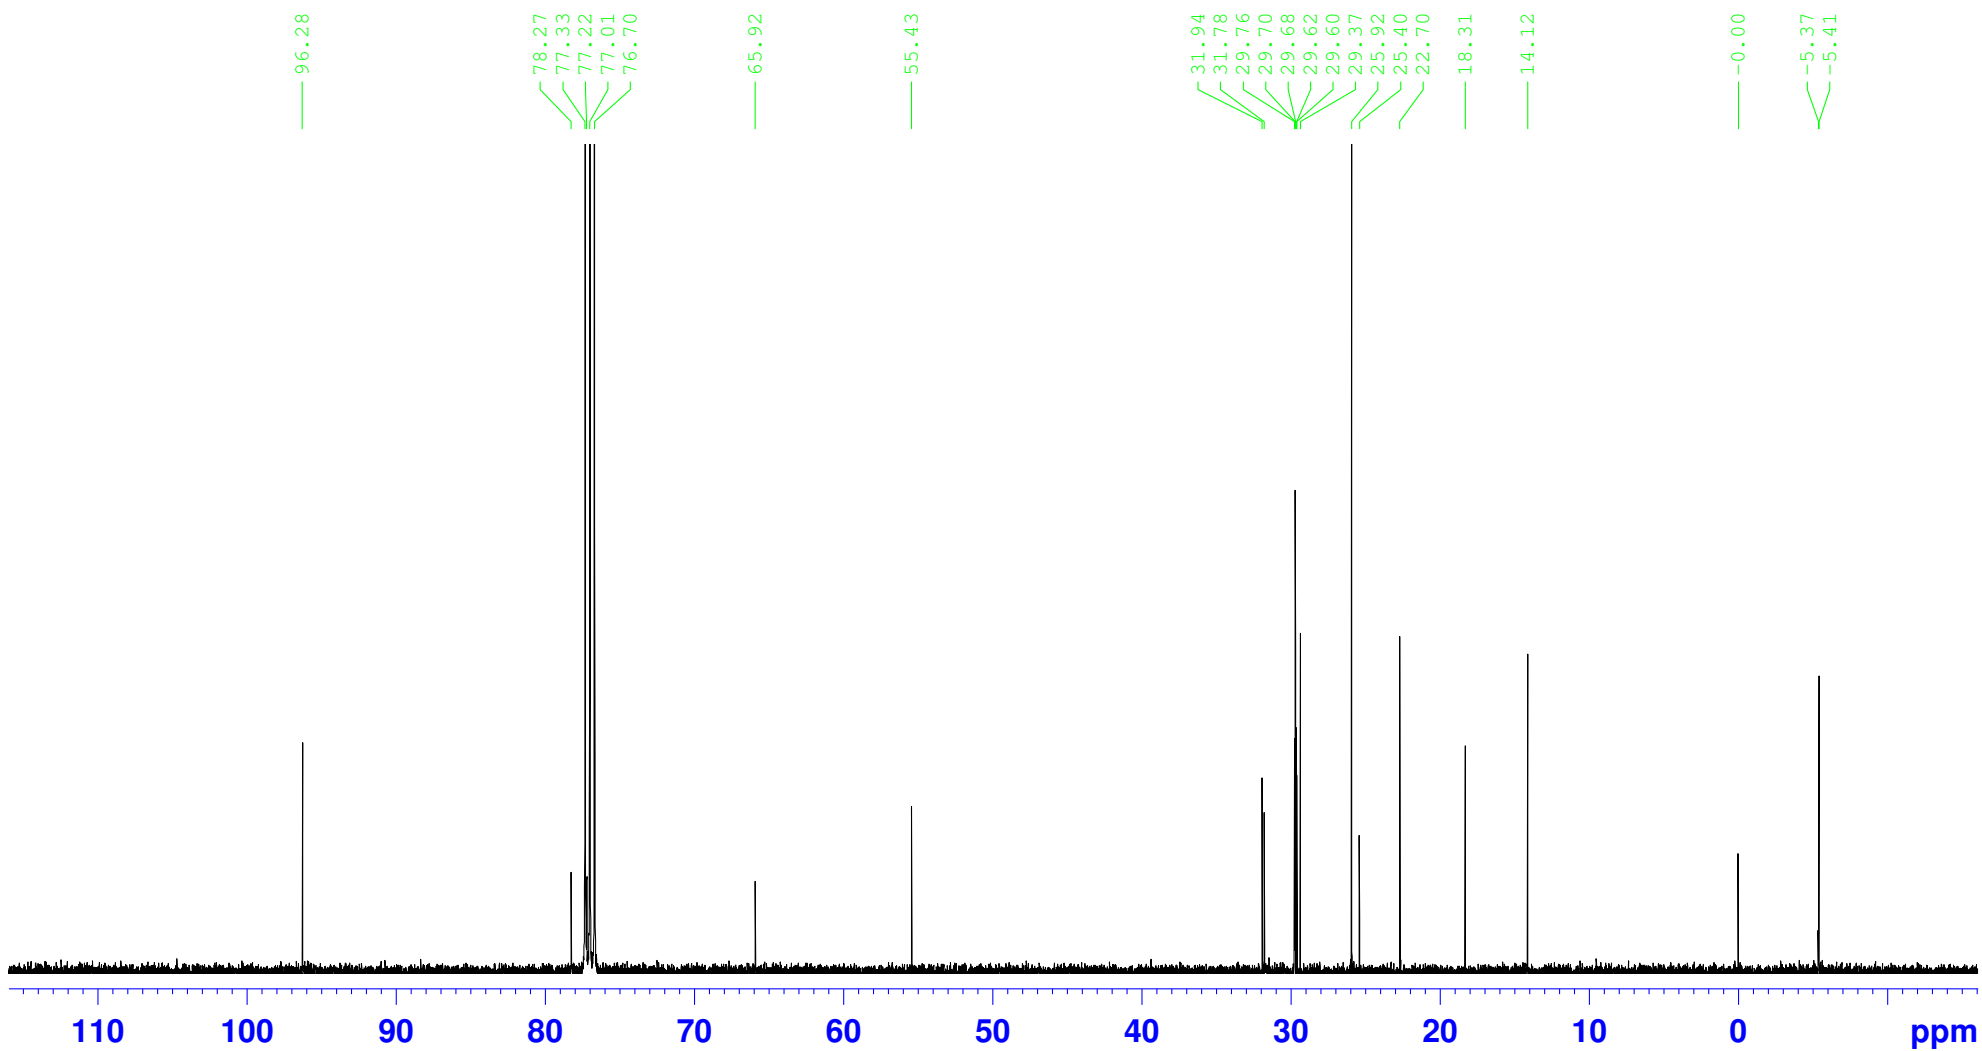

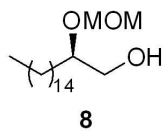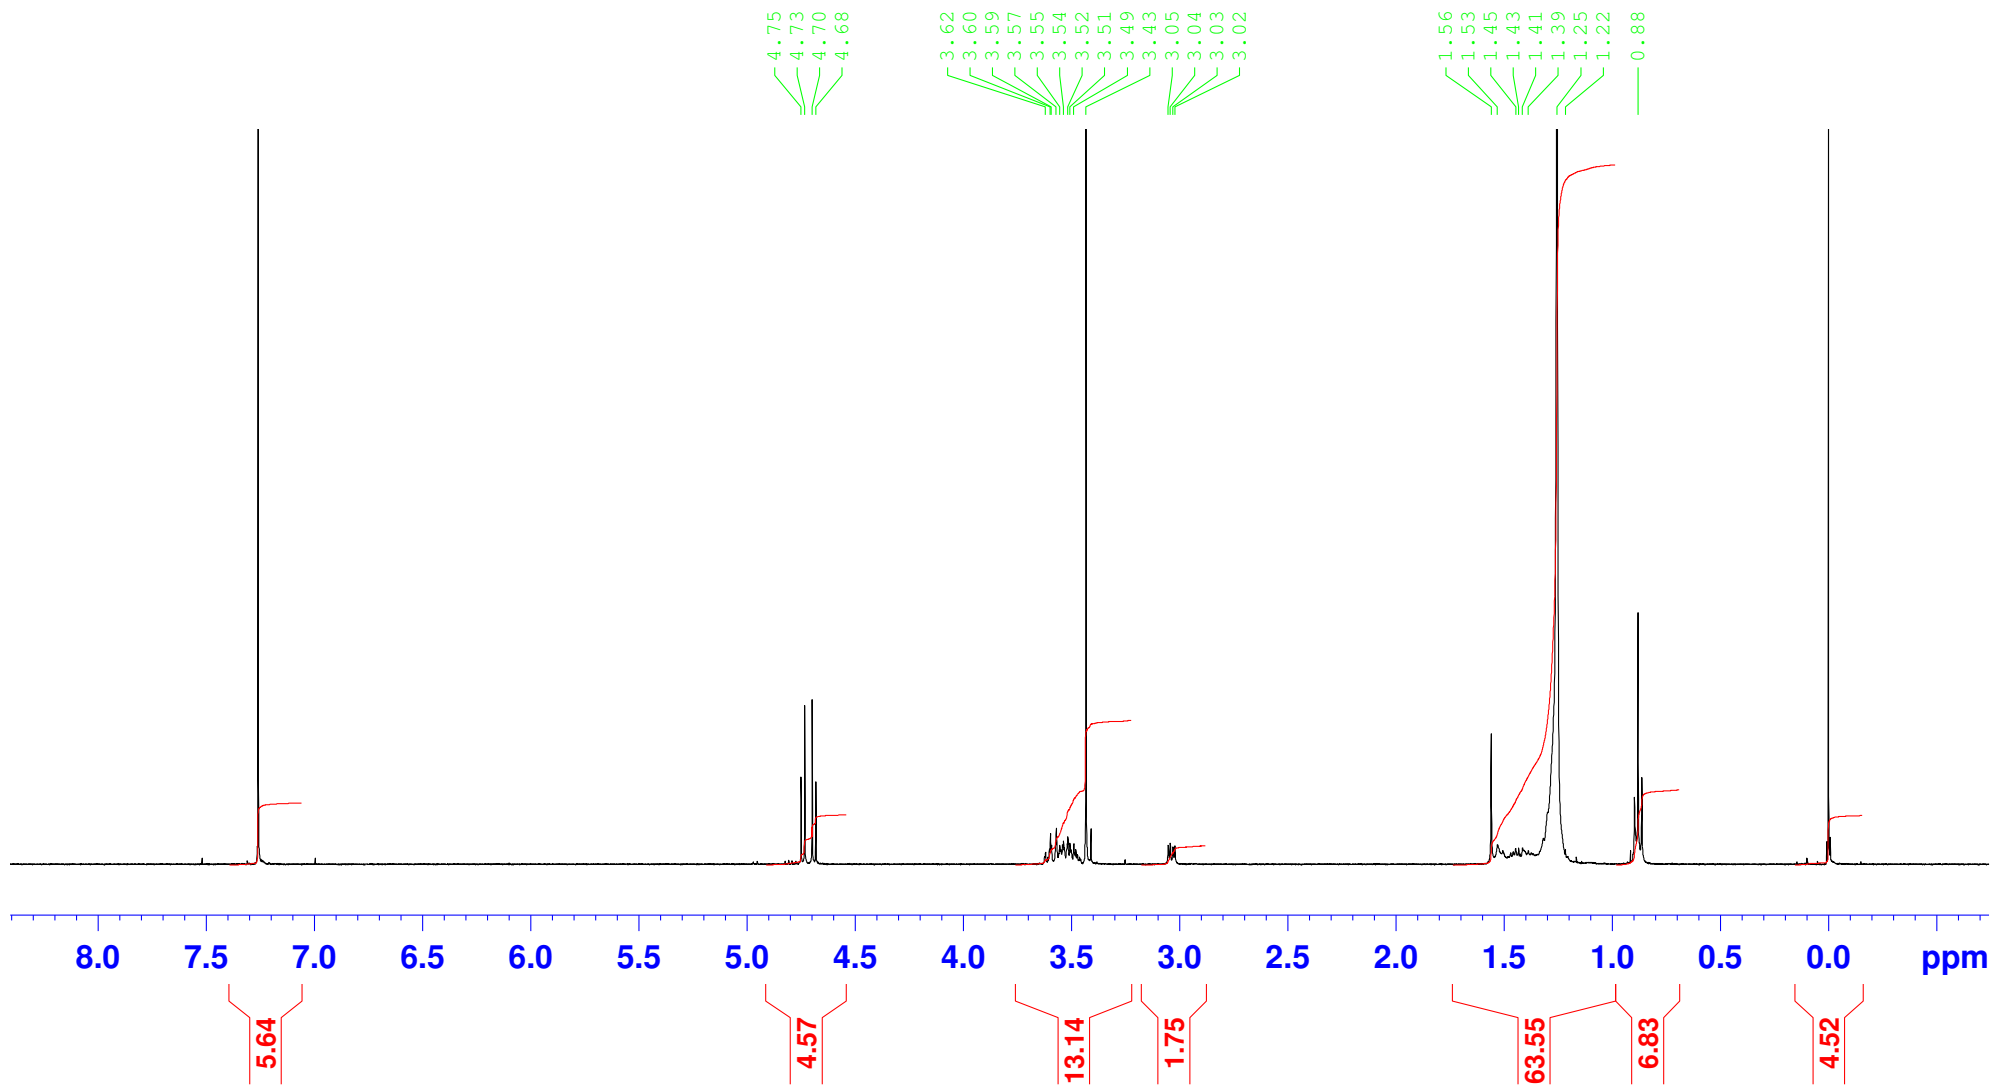

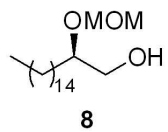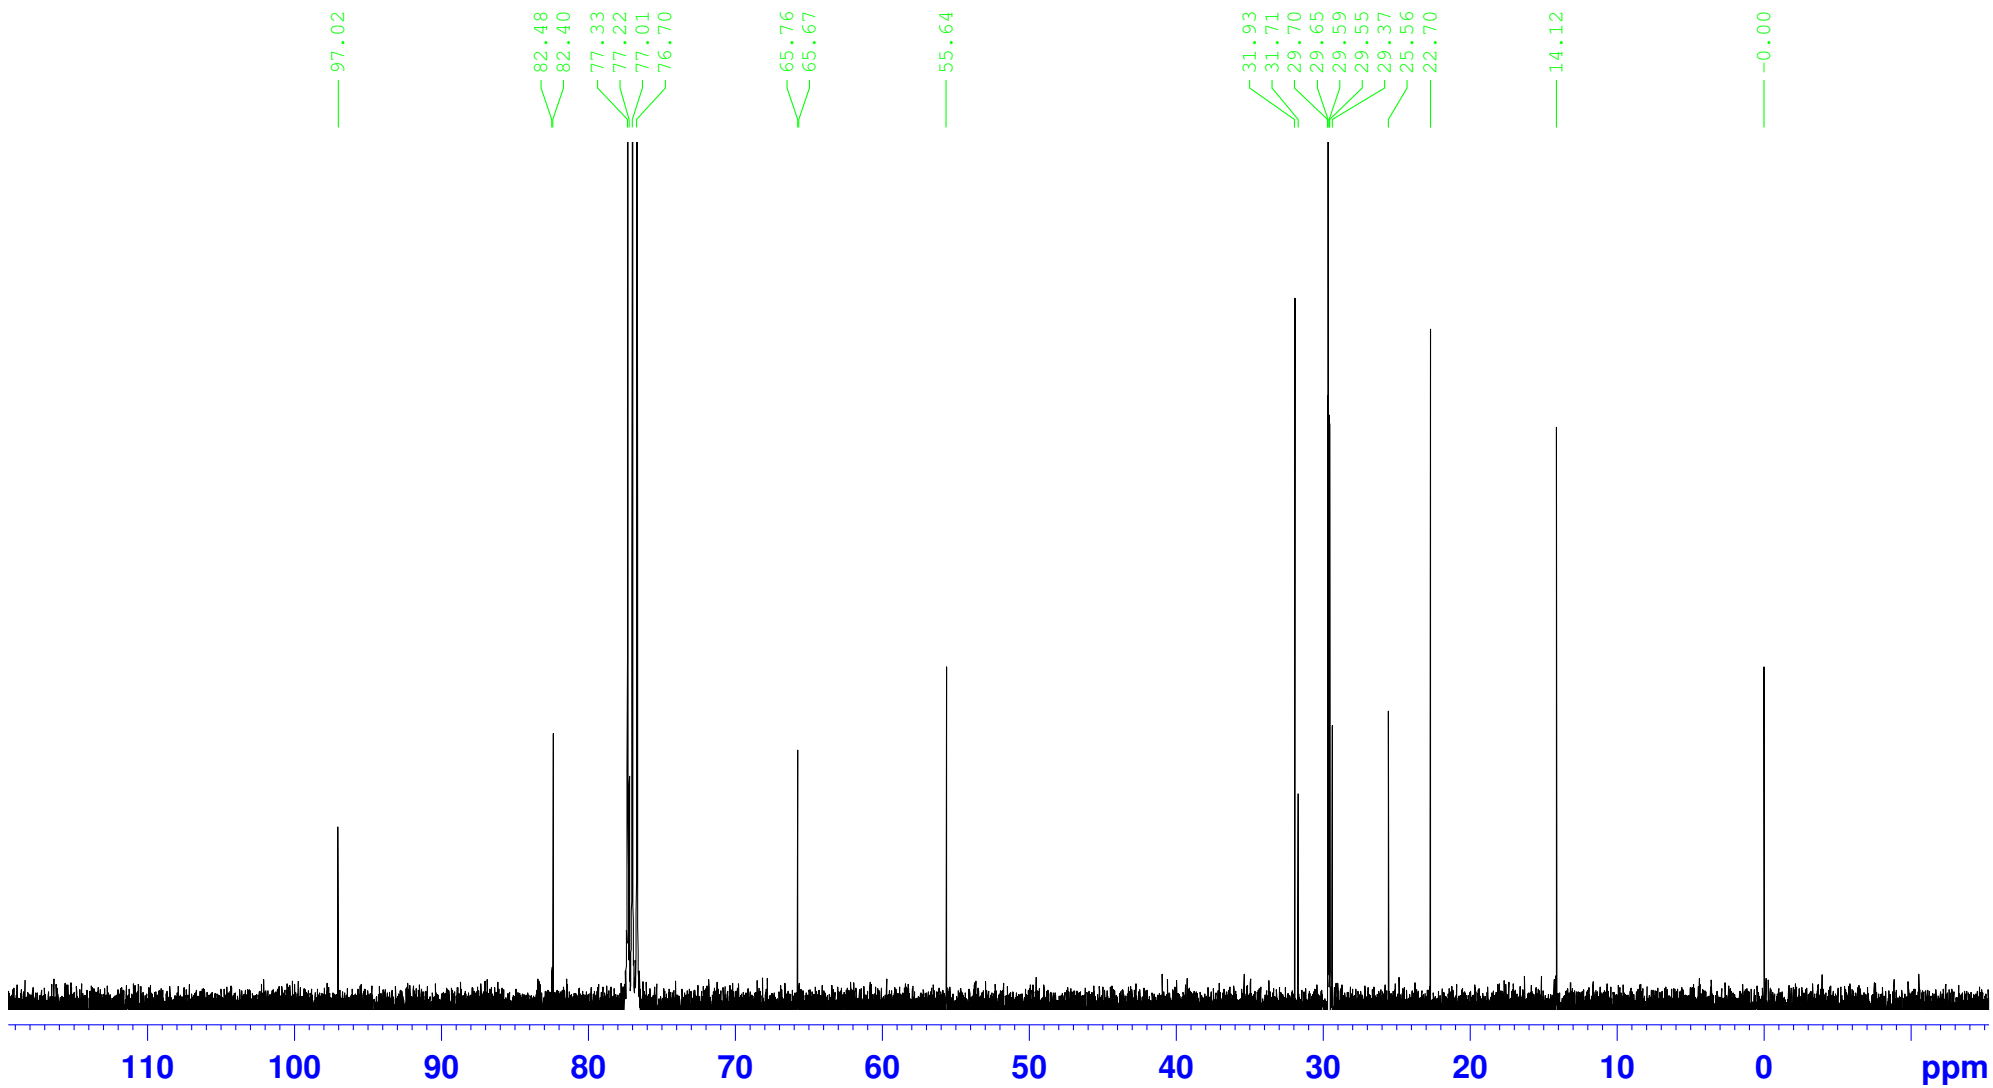

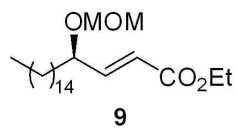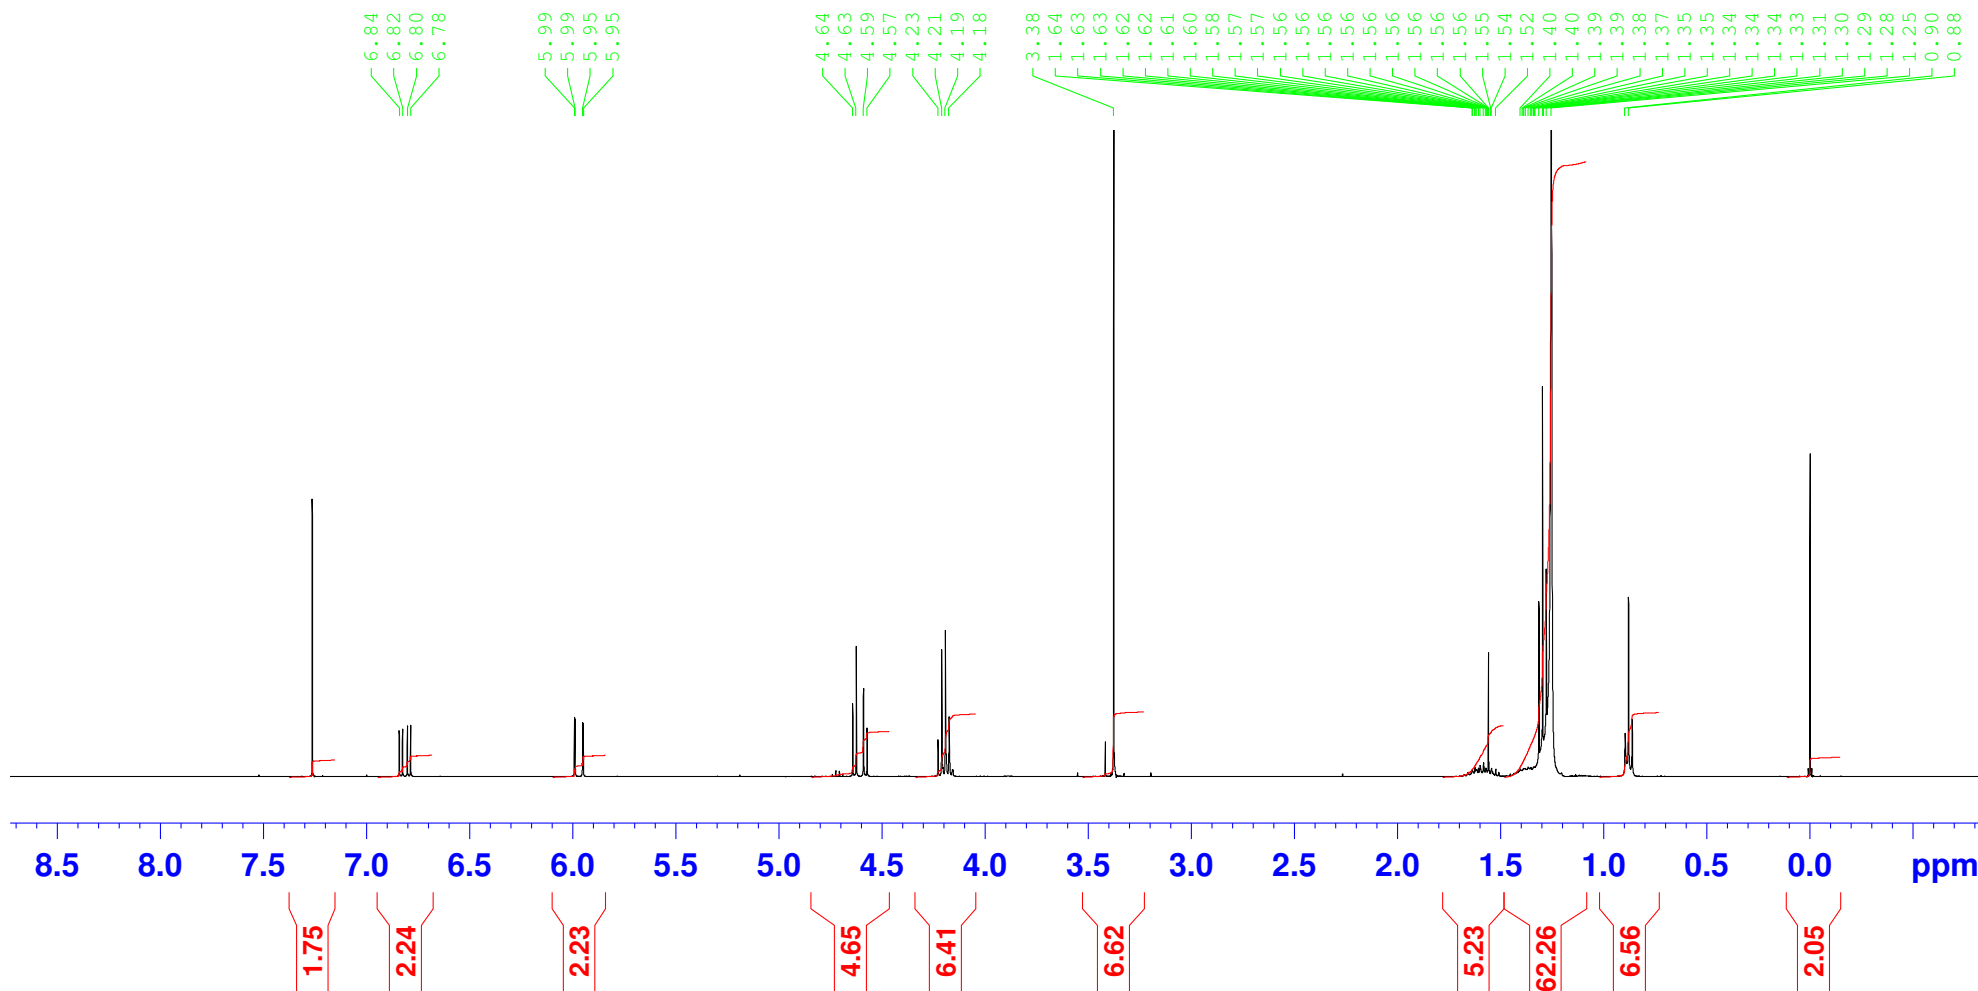



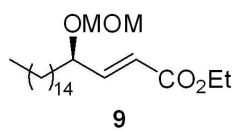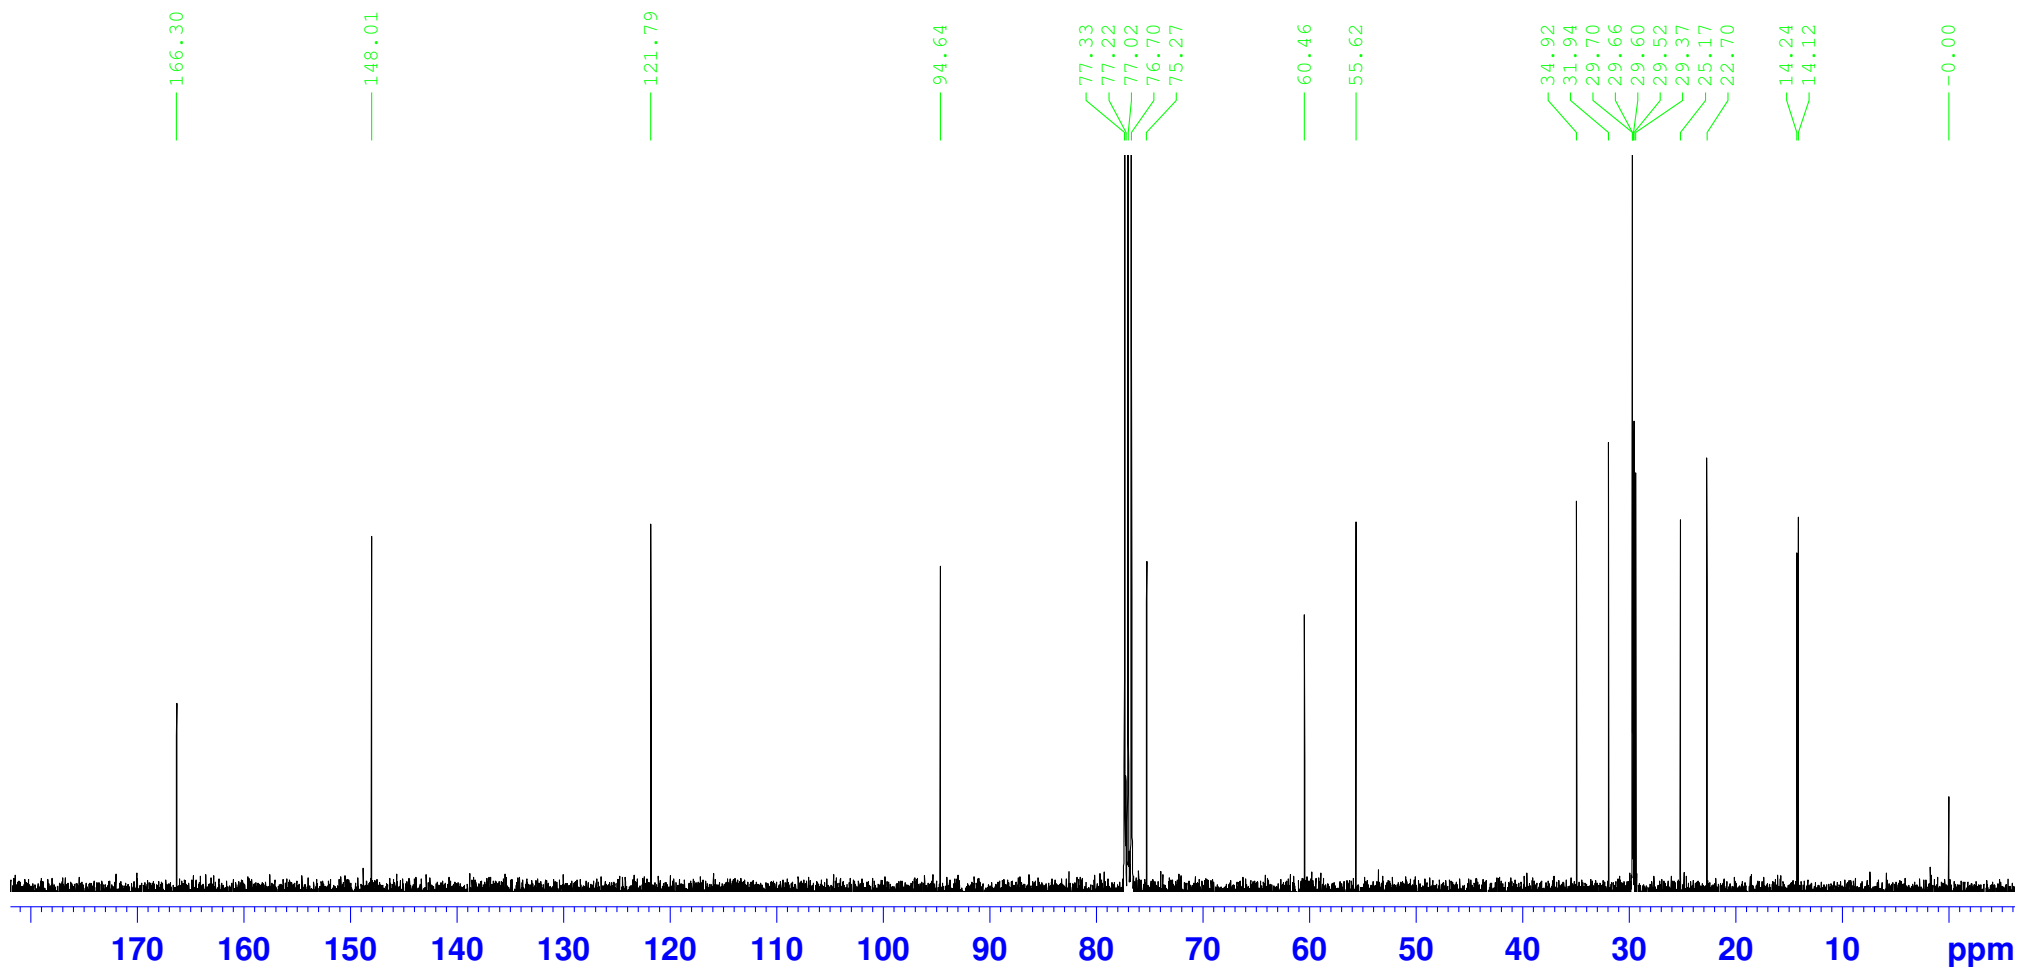

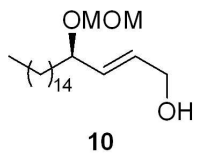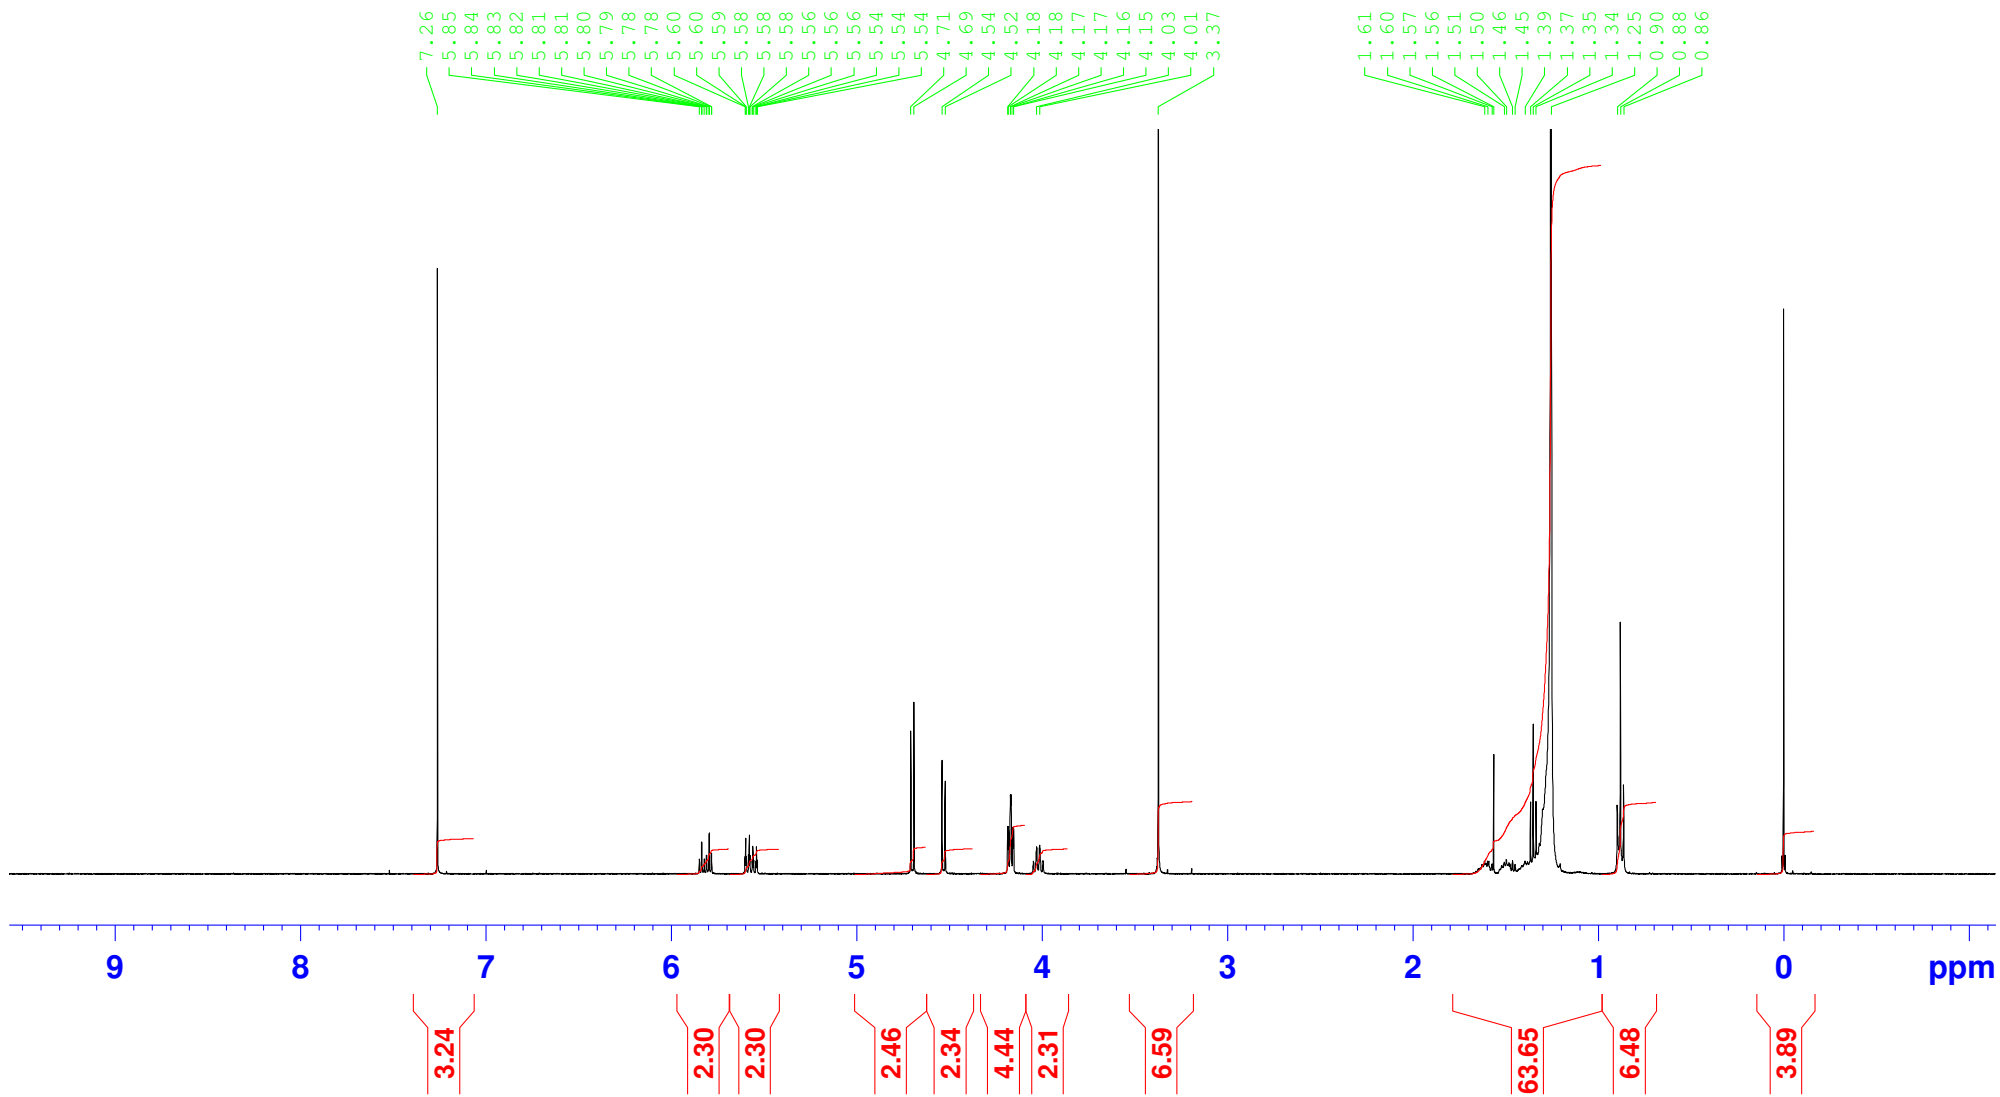

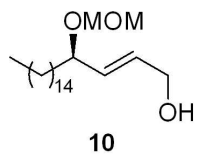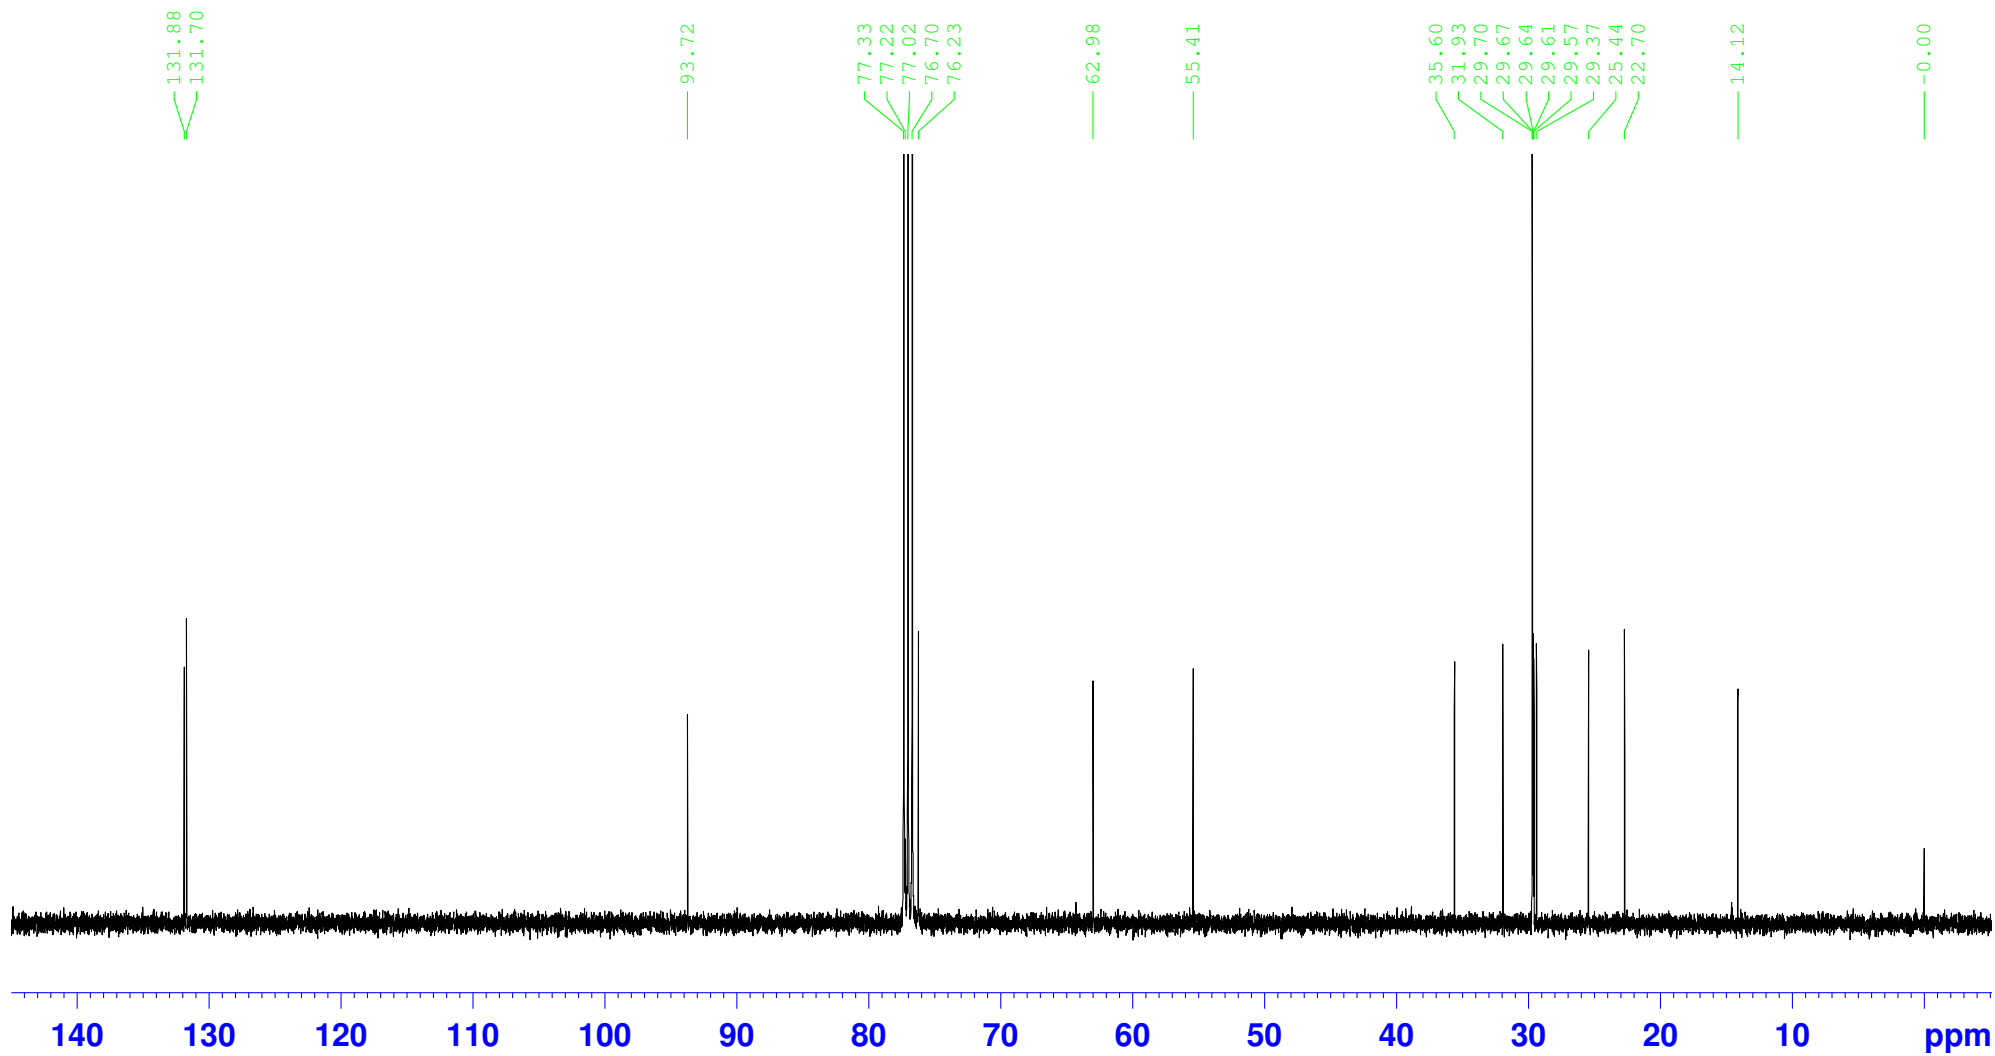

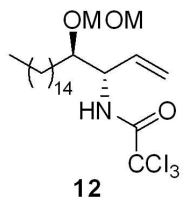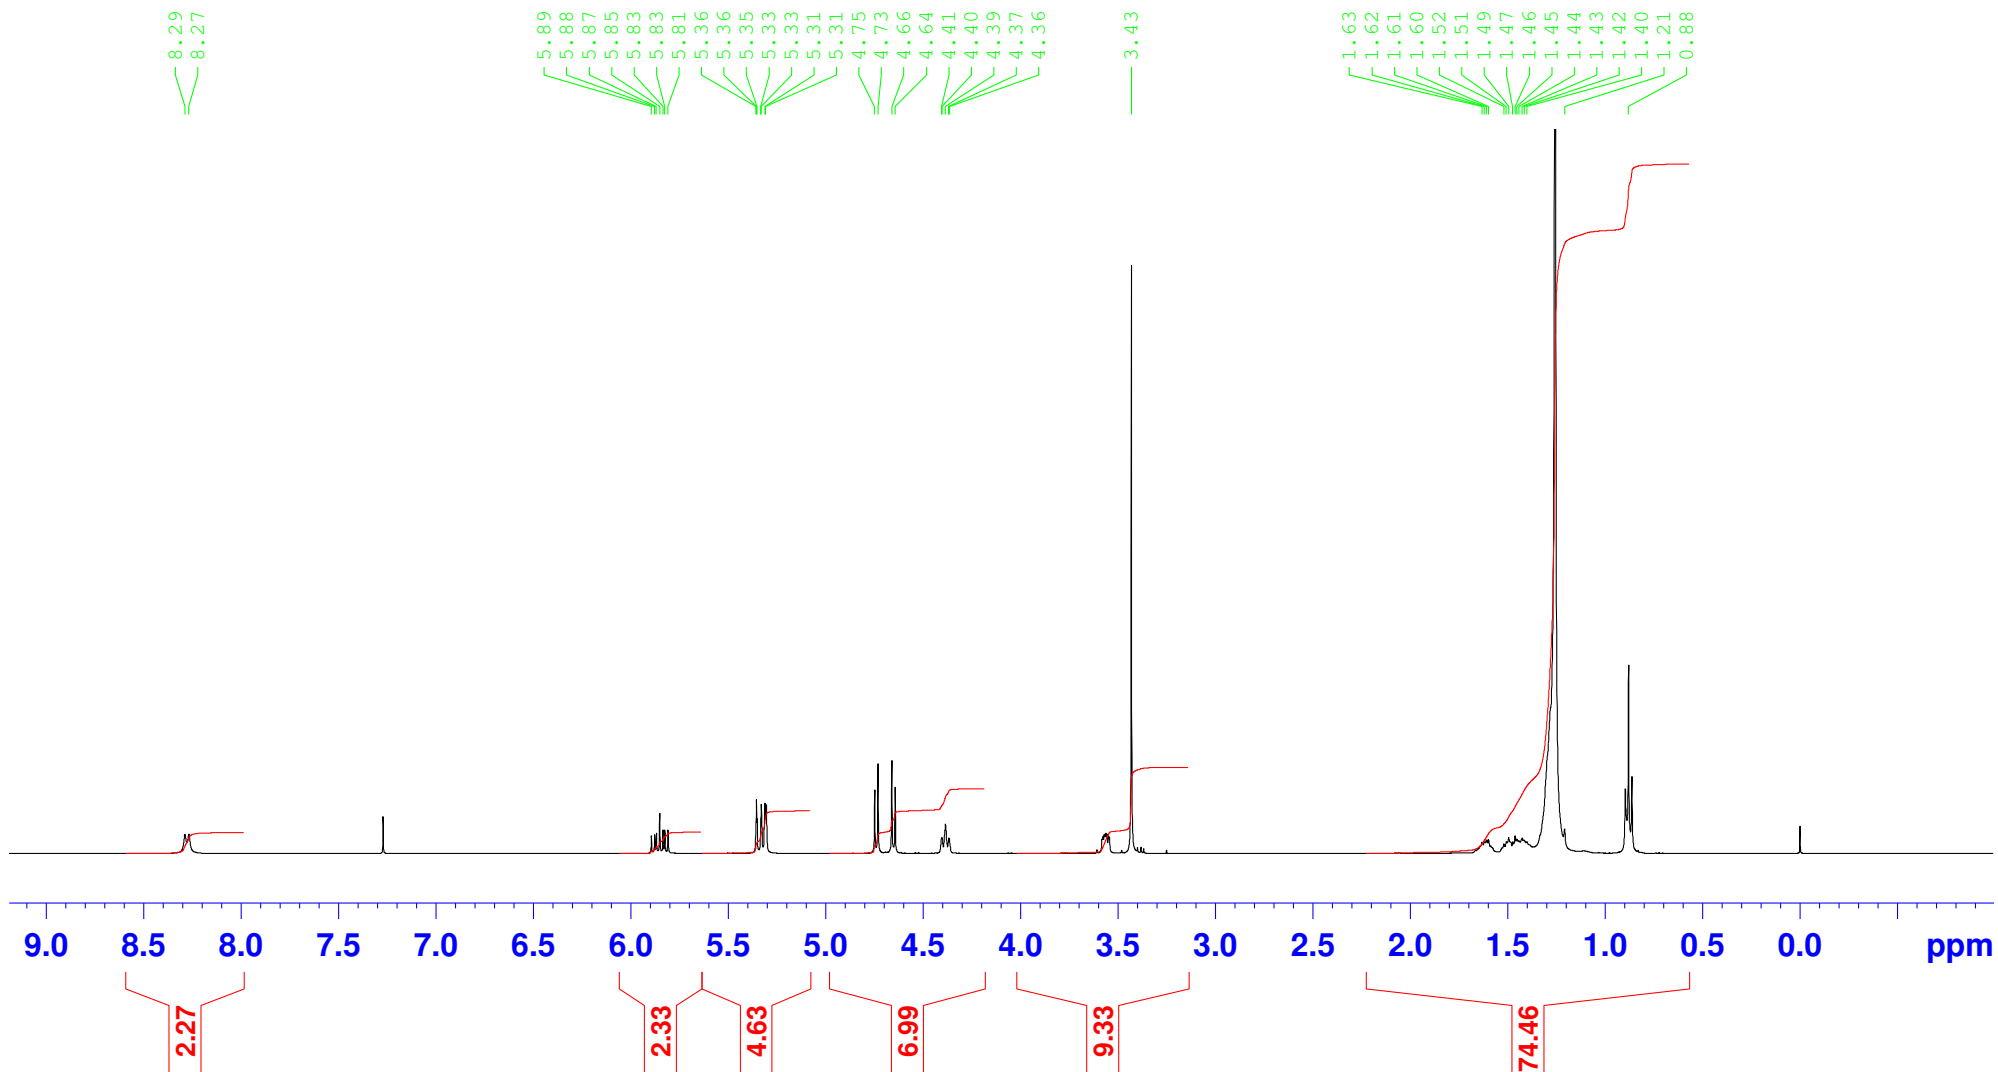

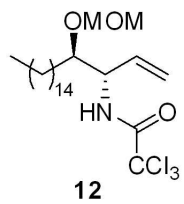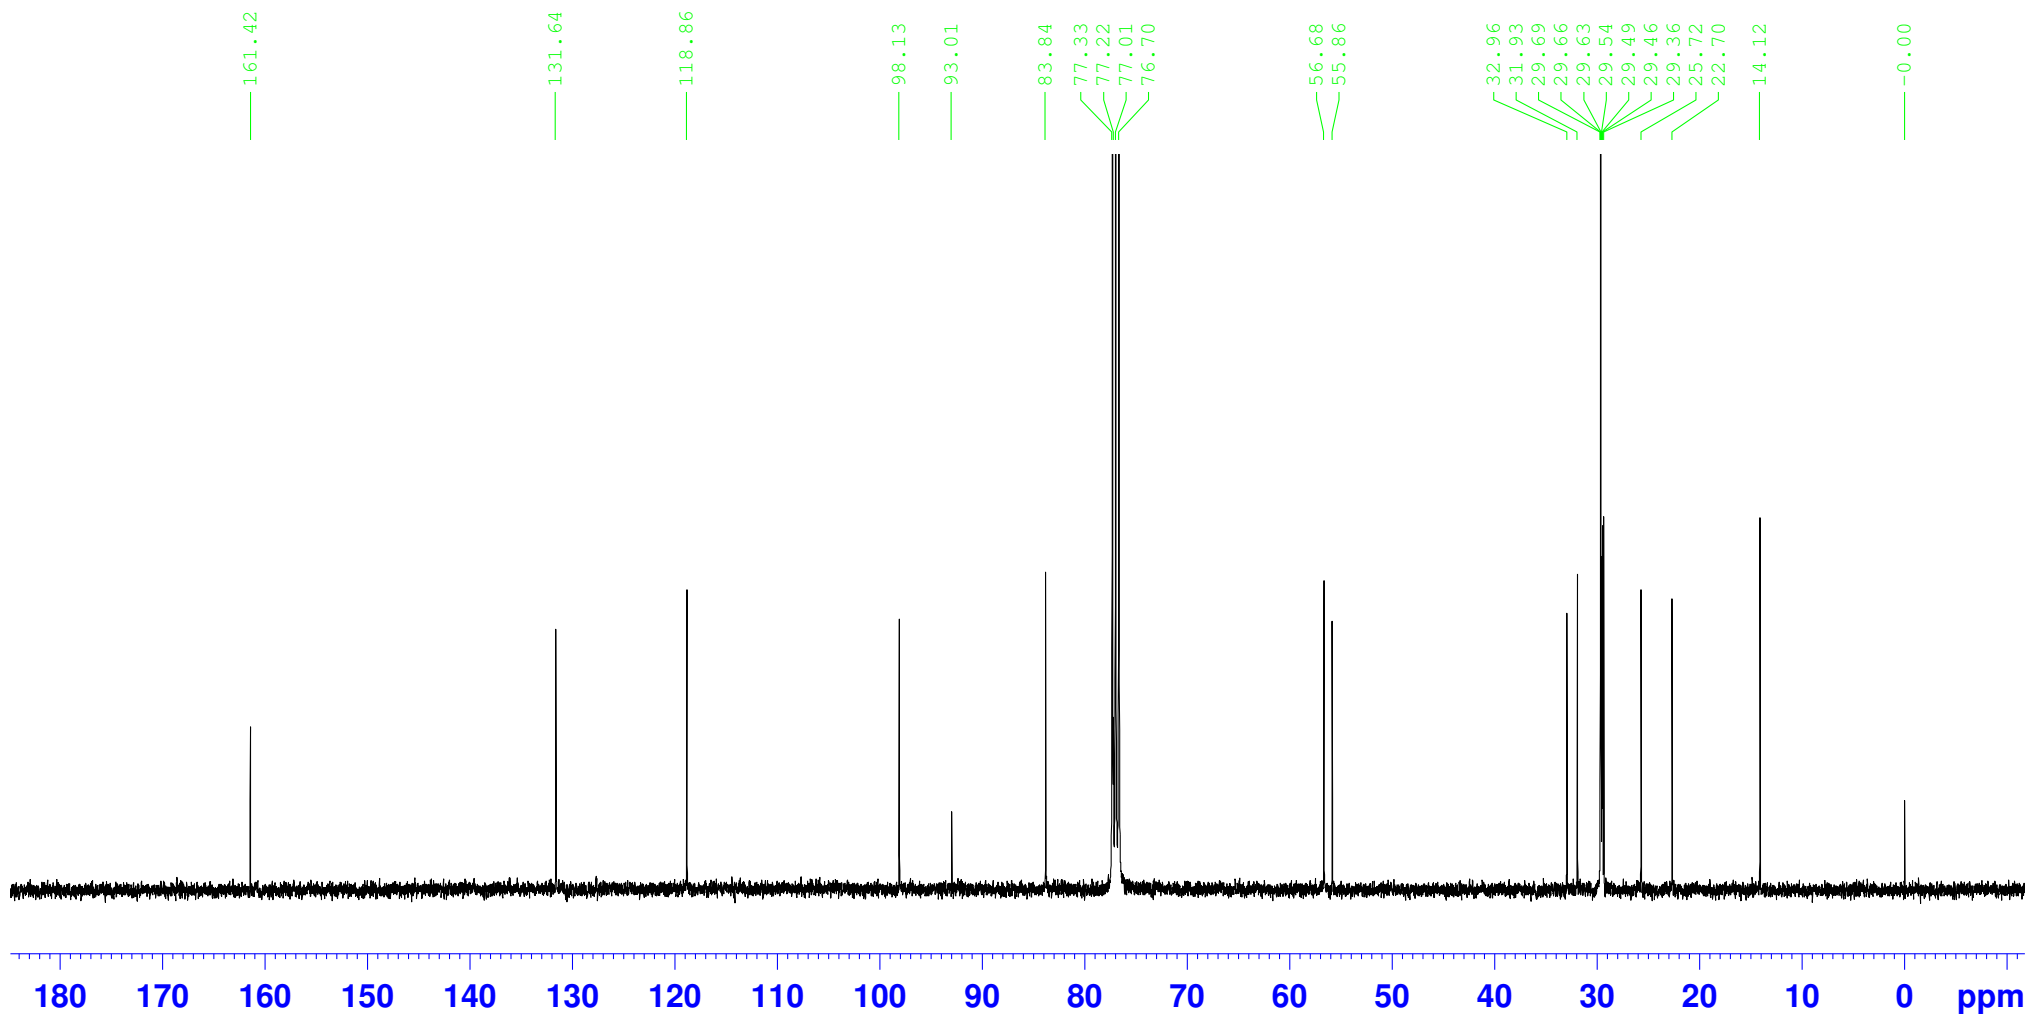

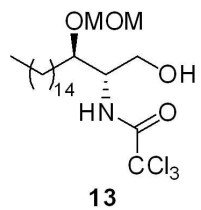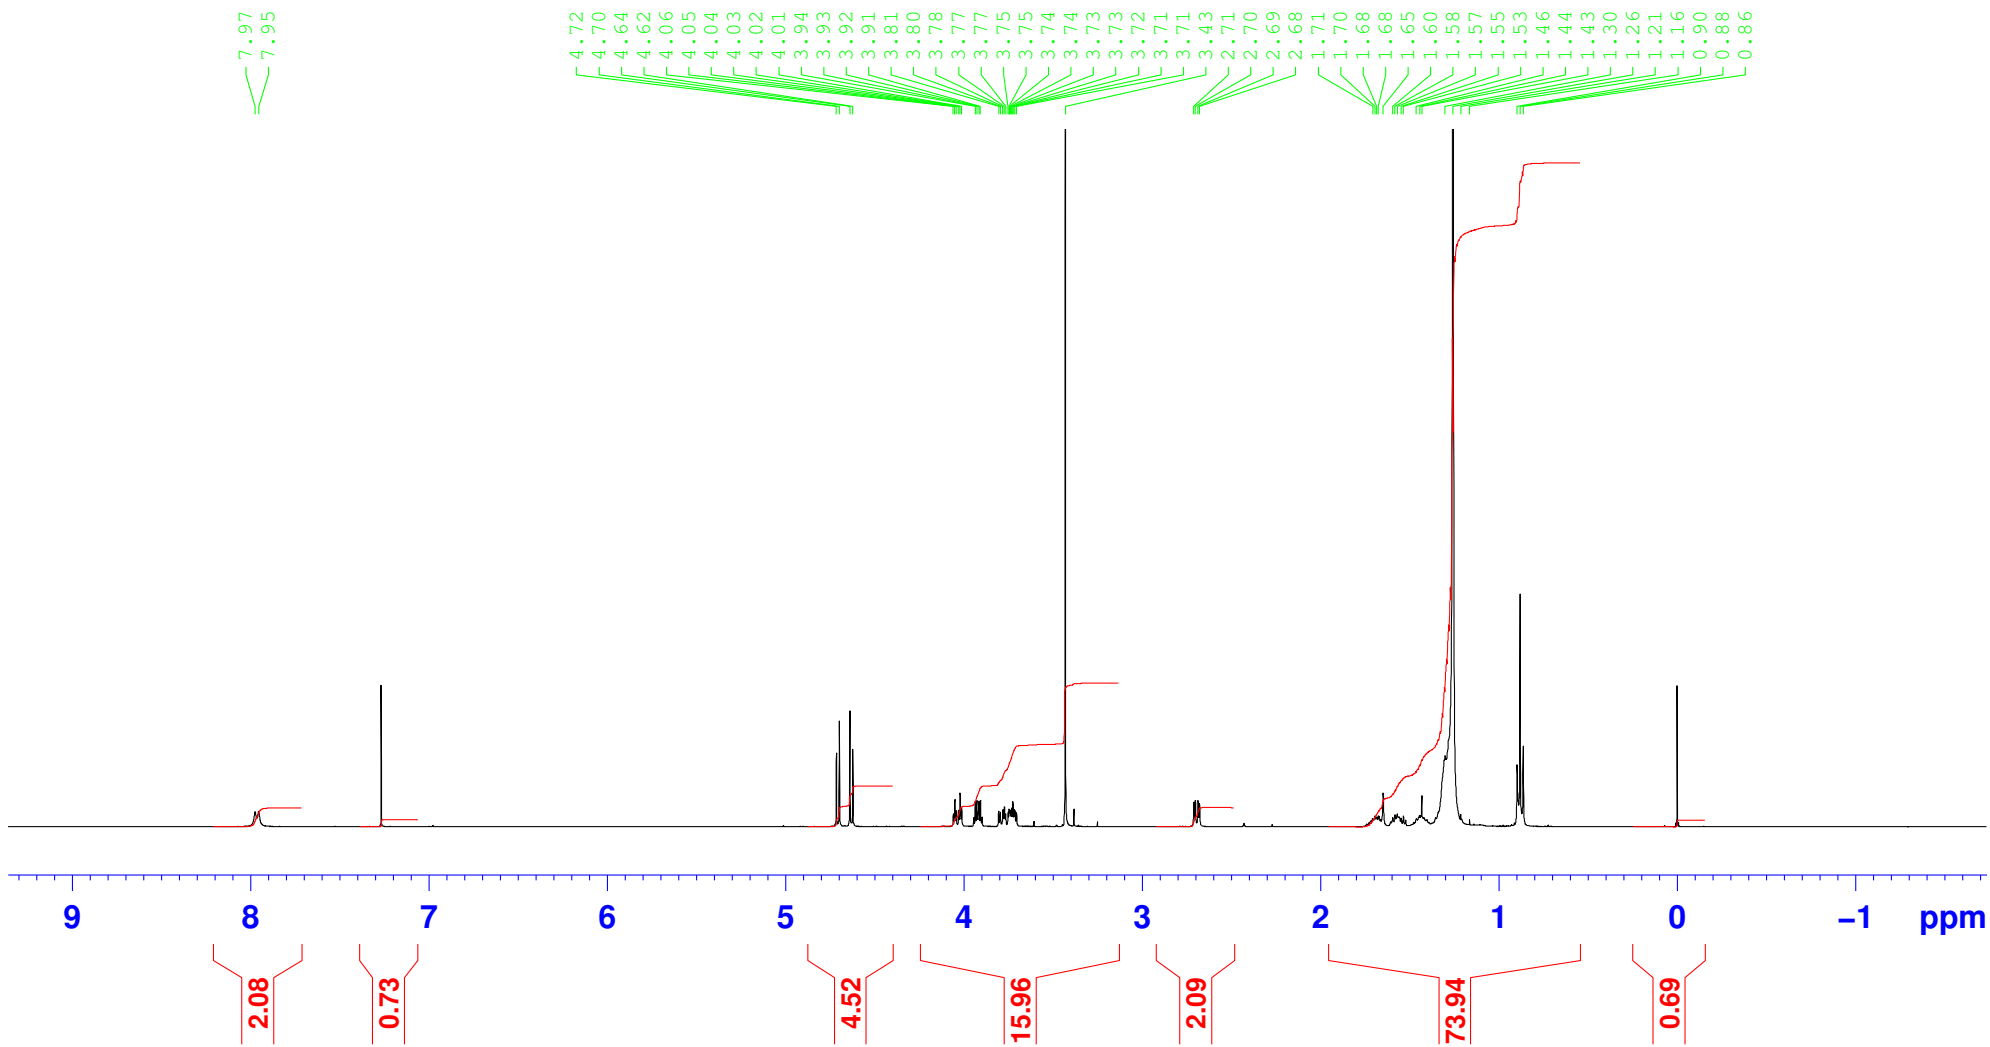

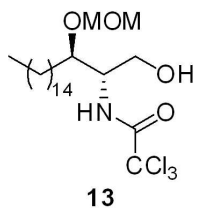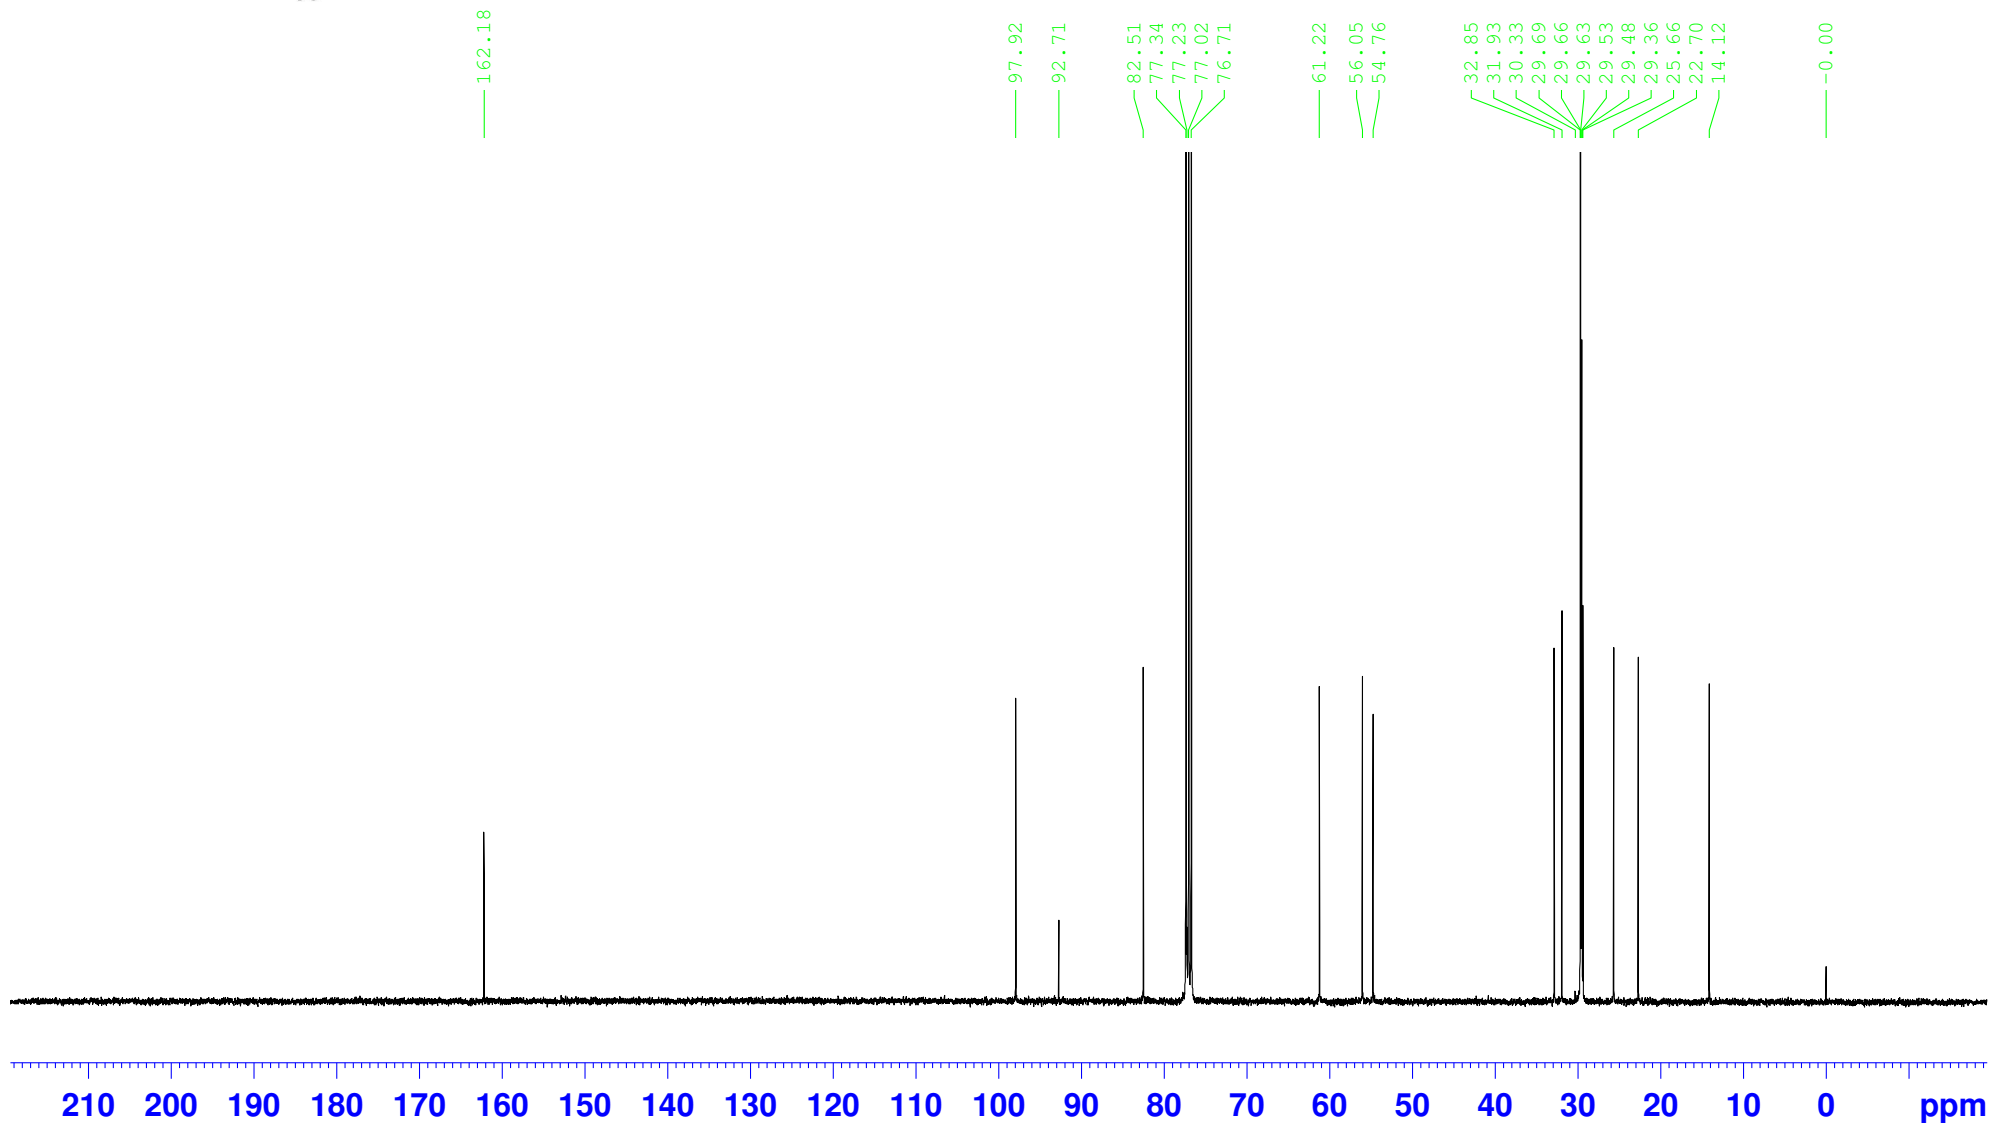

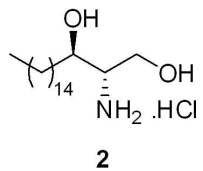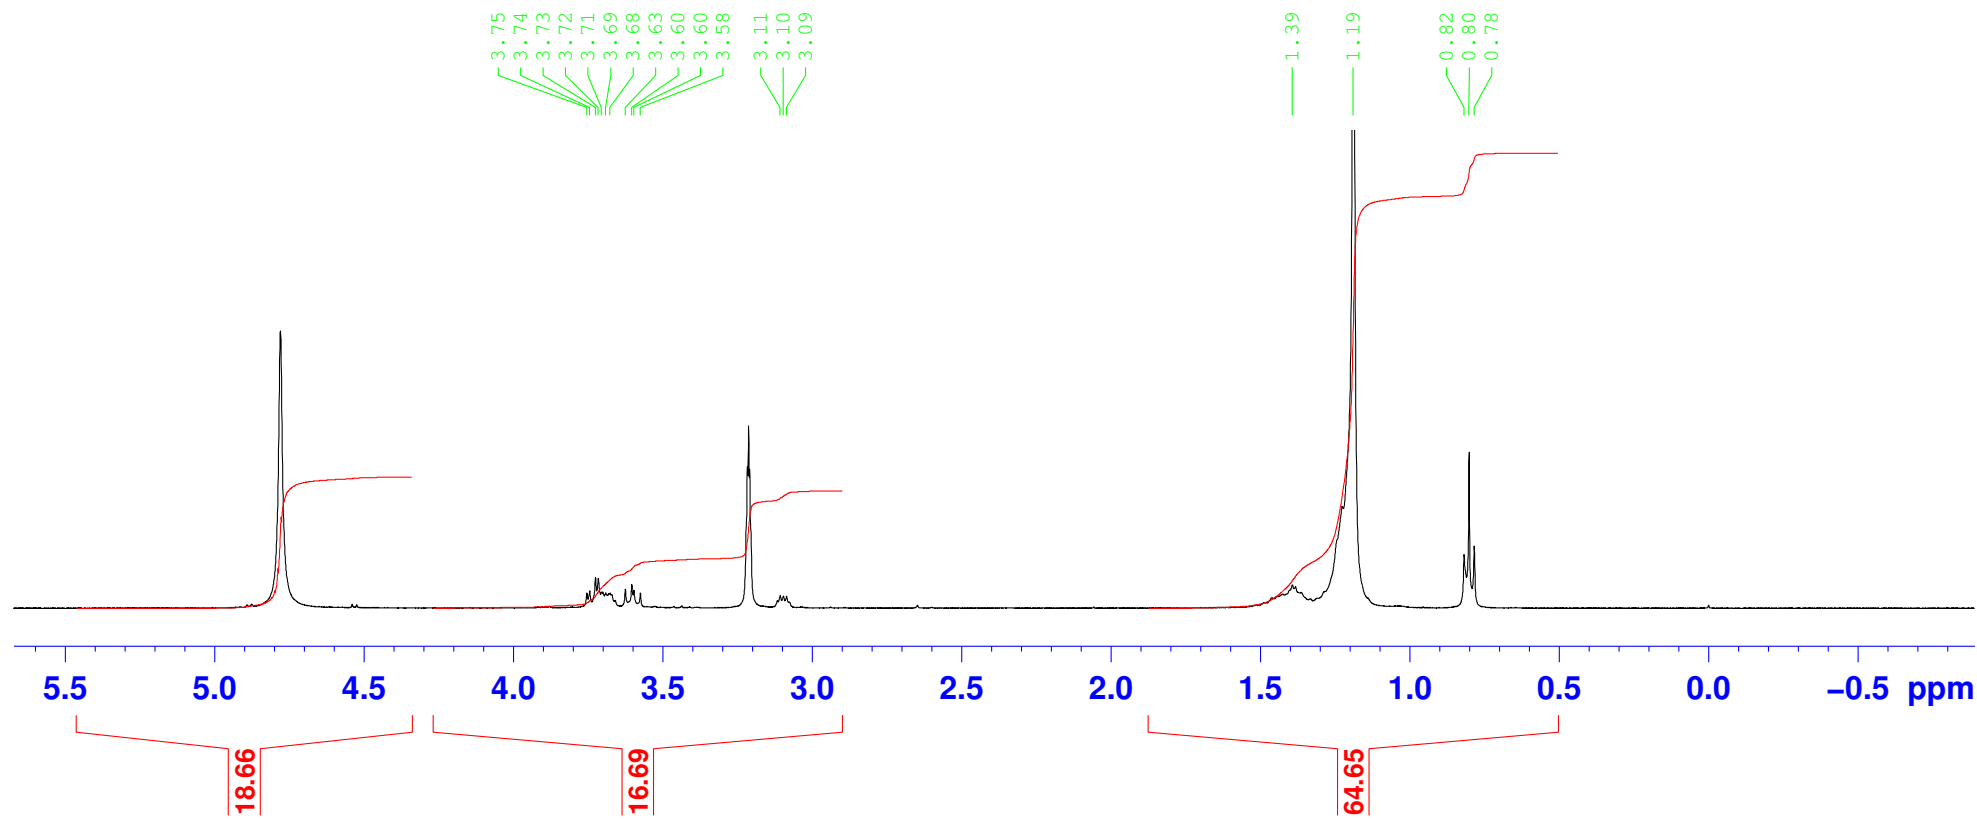



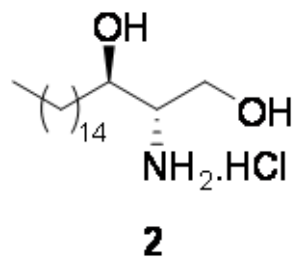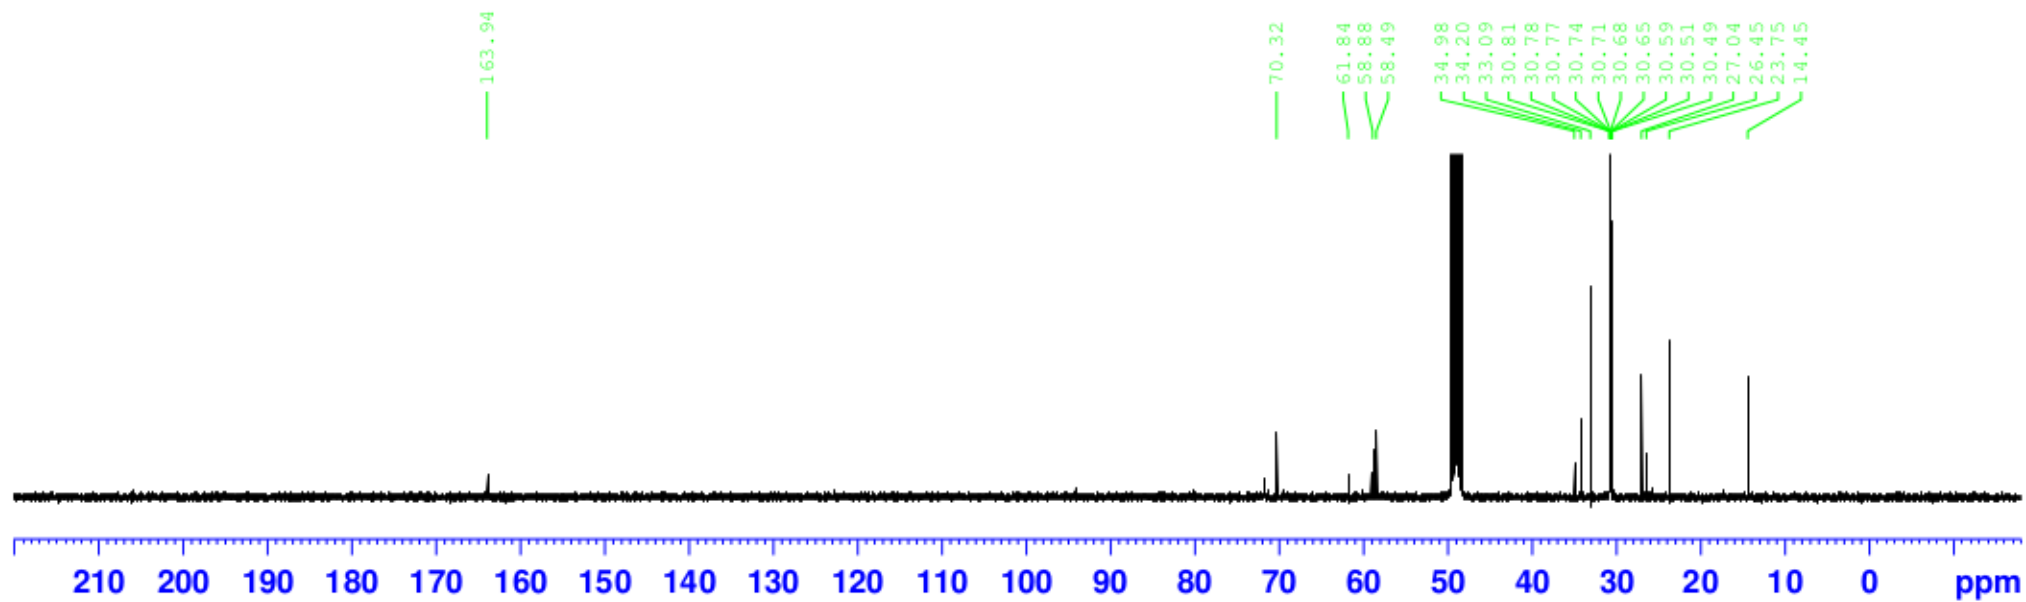

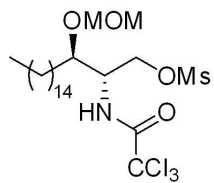

8.14  
8.12

4.74  
4.72  
4.64  
4.62  
4.51  
4.50  
4.49  
4.48  
4.37  
4.35  
4.34  
4.32  
4.29  
4.28  
4.28  
4.27  
4.26  
4.25  
4.24  
3.64  
3.64  
3.63  
3.62  
3.62  
3.61  
3.60  
3.45  
3.06  
1.68  
1.68  
1.66  
1.65  
1.63  
1.60  
1.58  
1.57  
1.56  
1.55  
1.54  
1.52  
1.45  
1.43  
1.30  
1.26  
1.21  
0.88

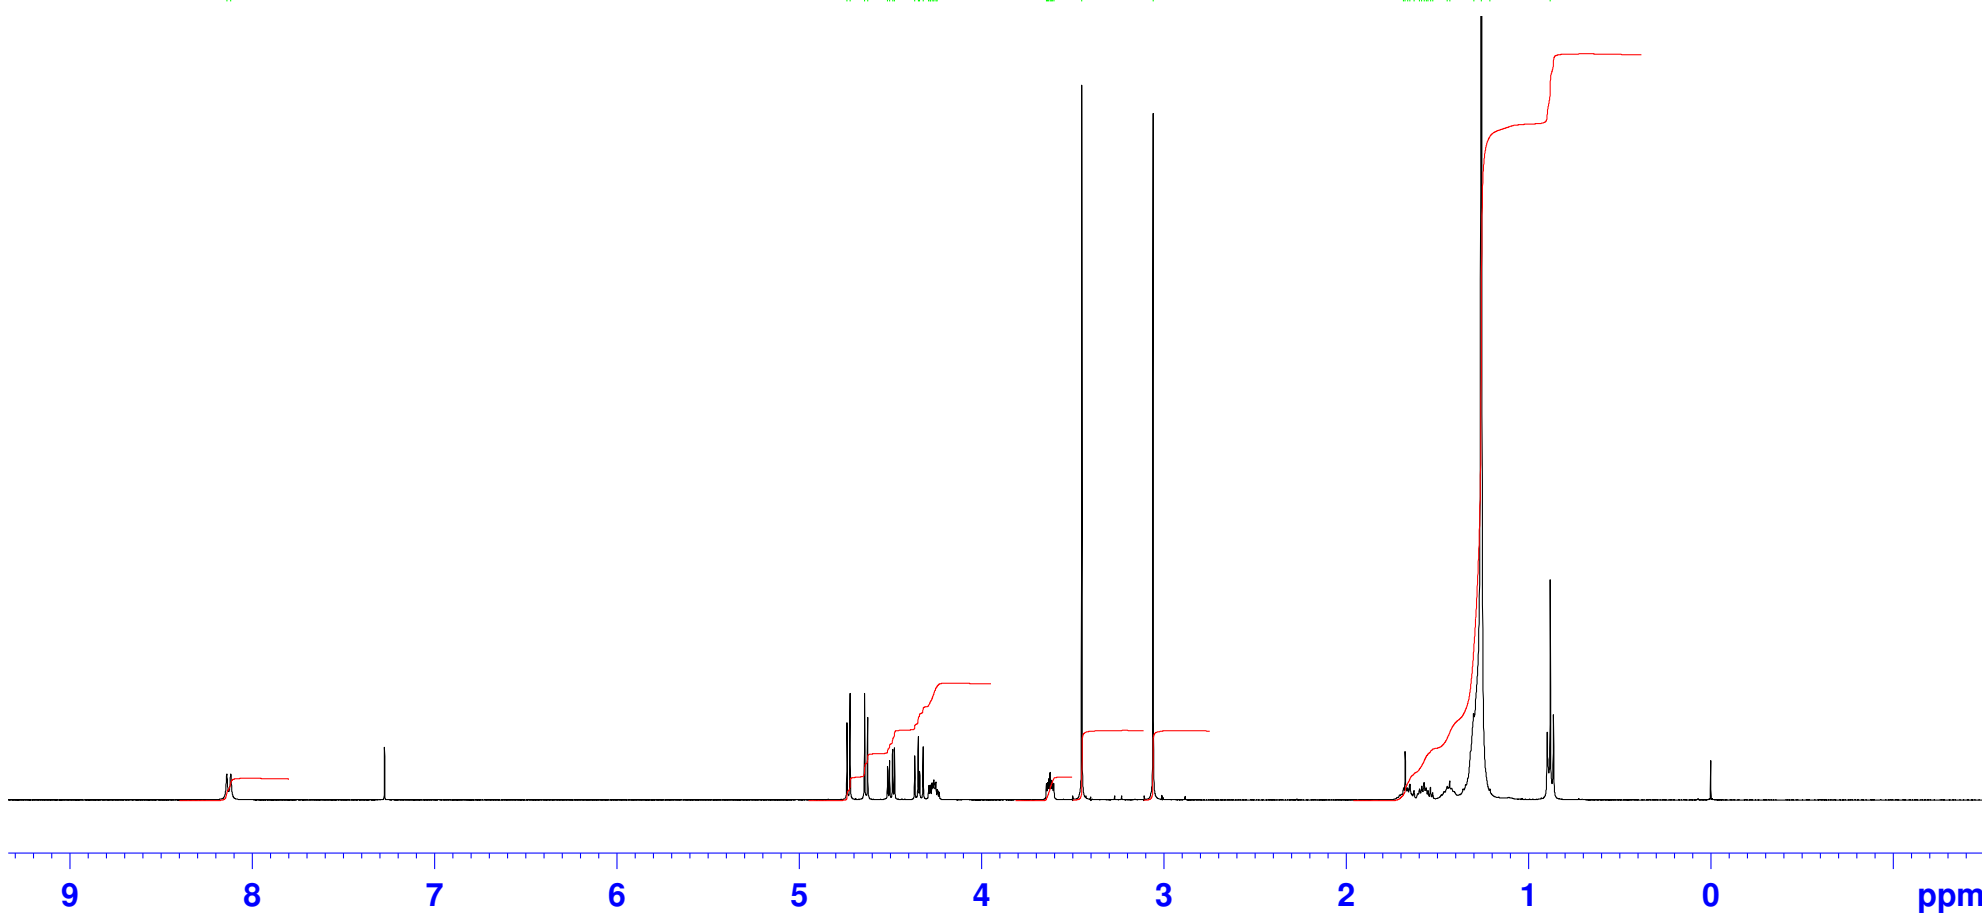

2.04

11.14

2.24

6.69

6.63

71.27



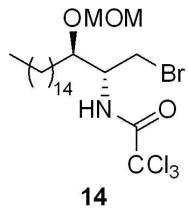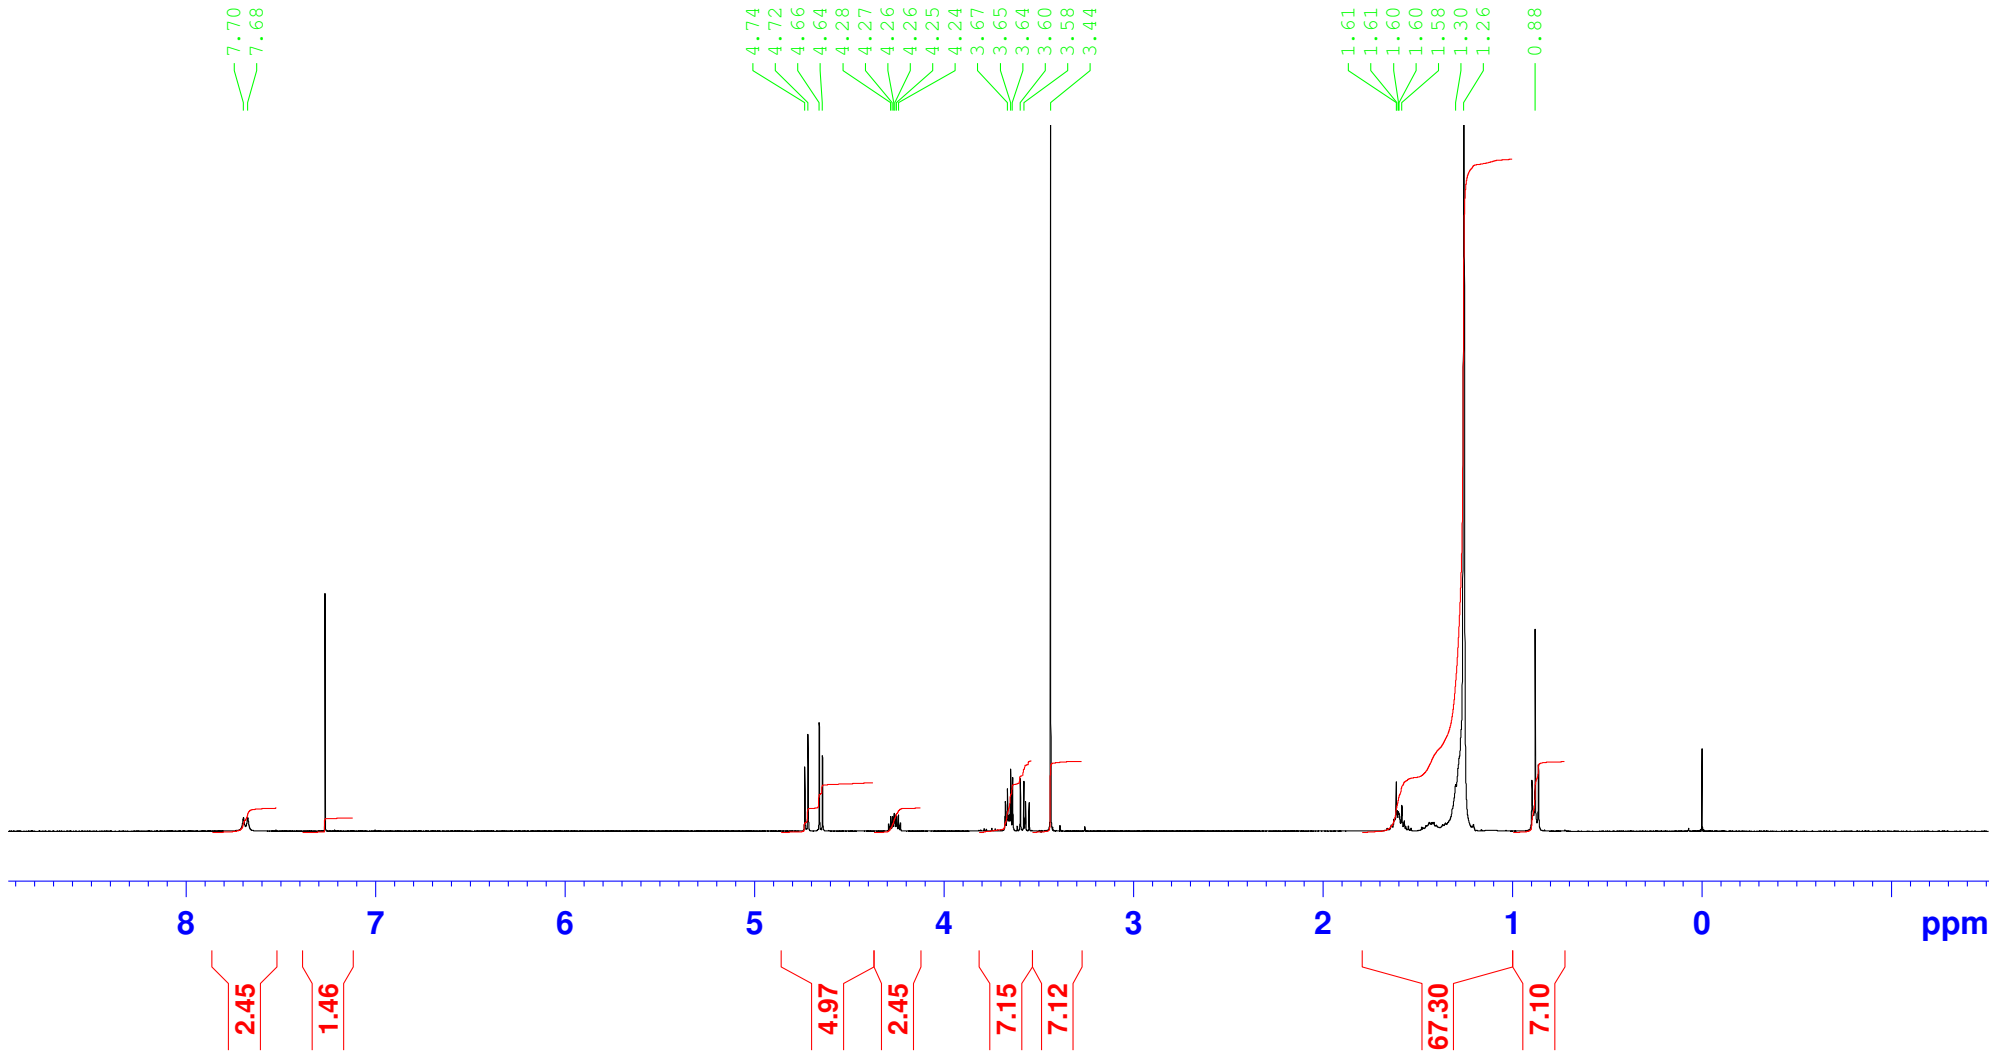



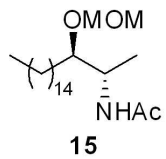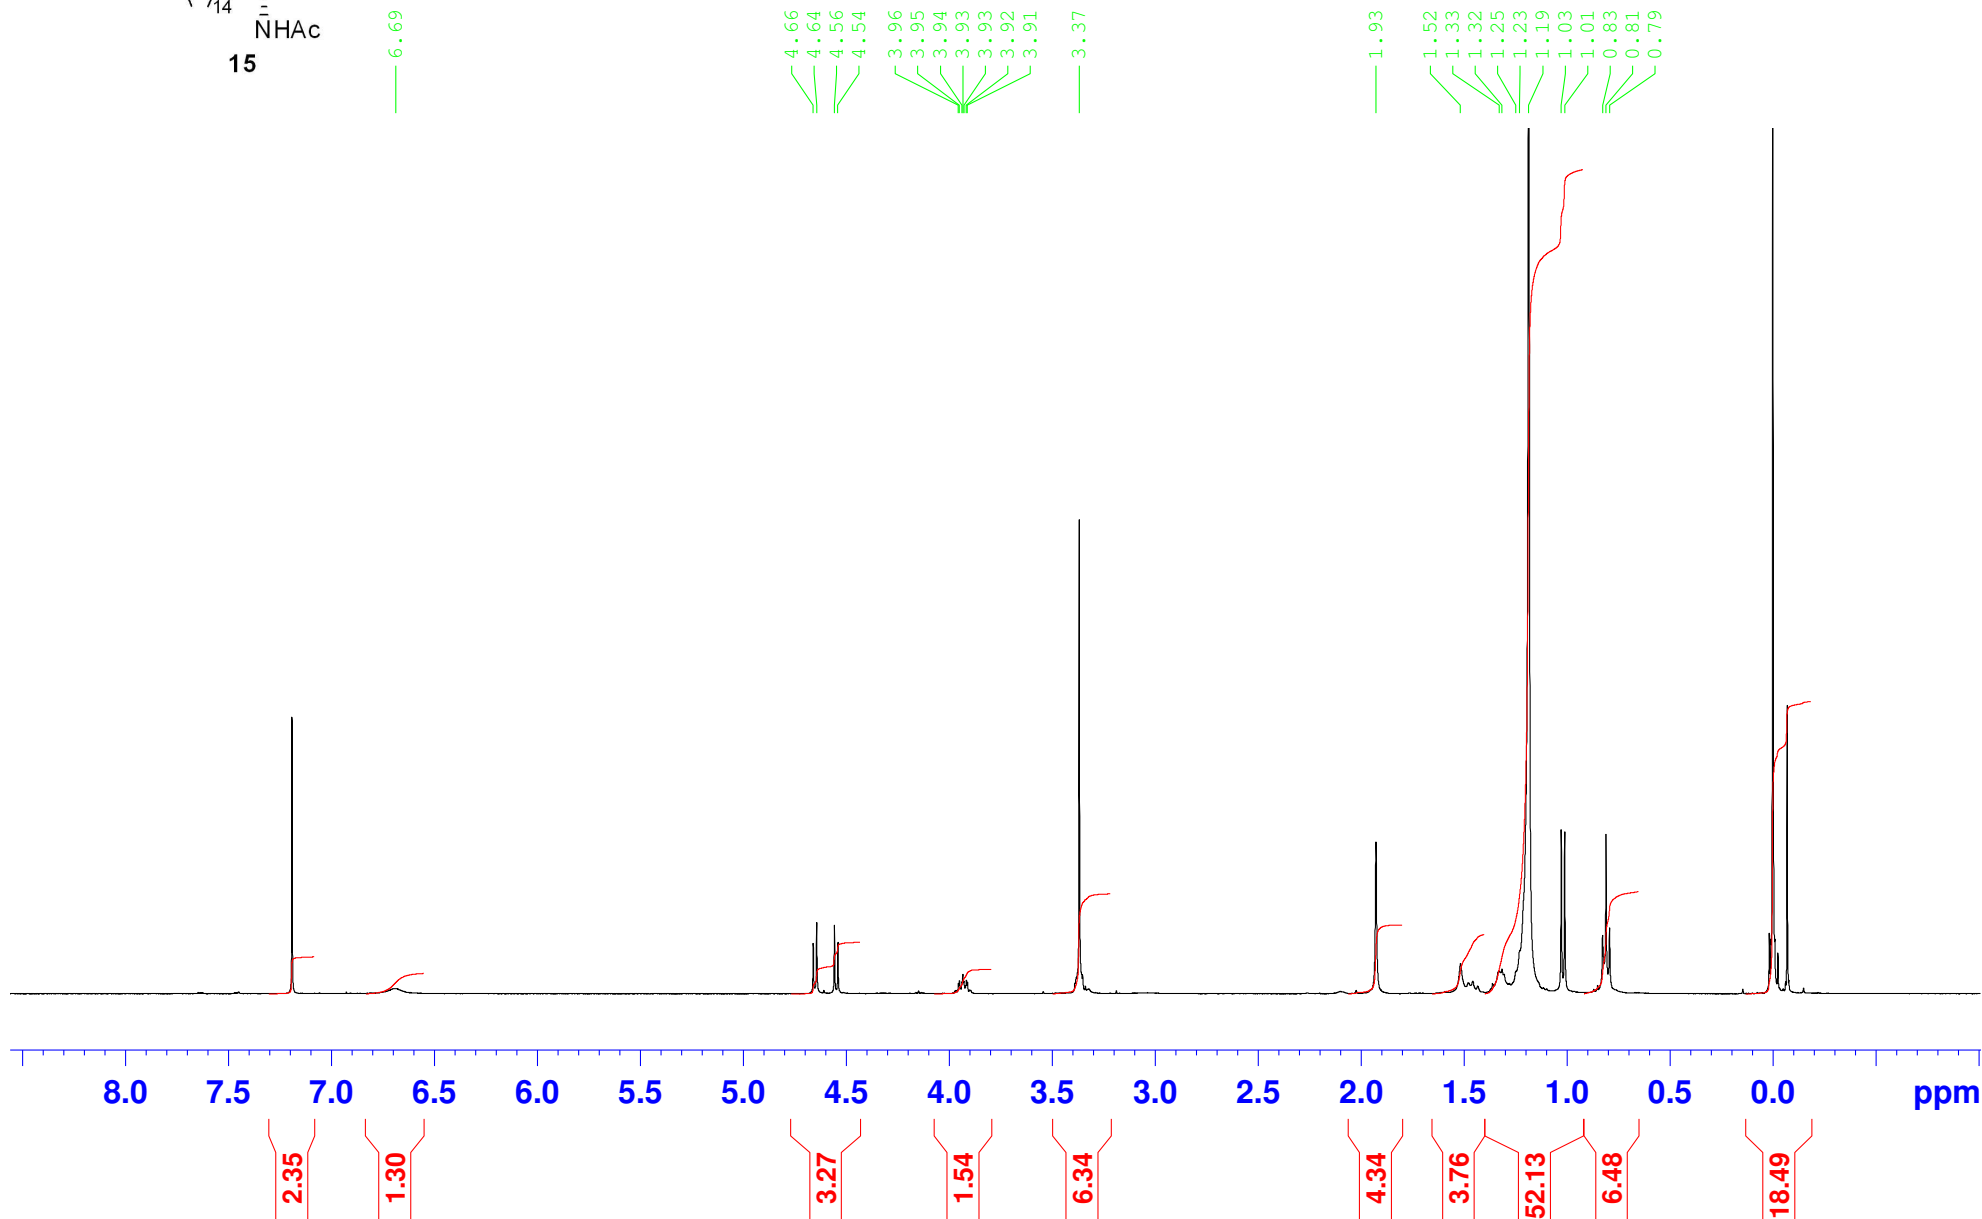

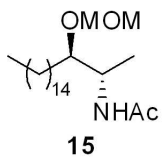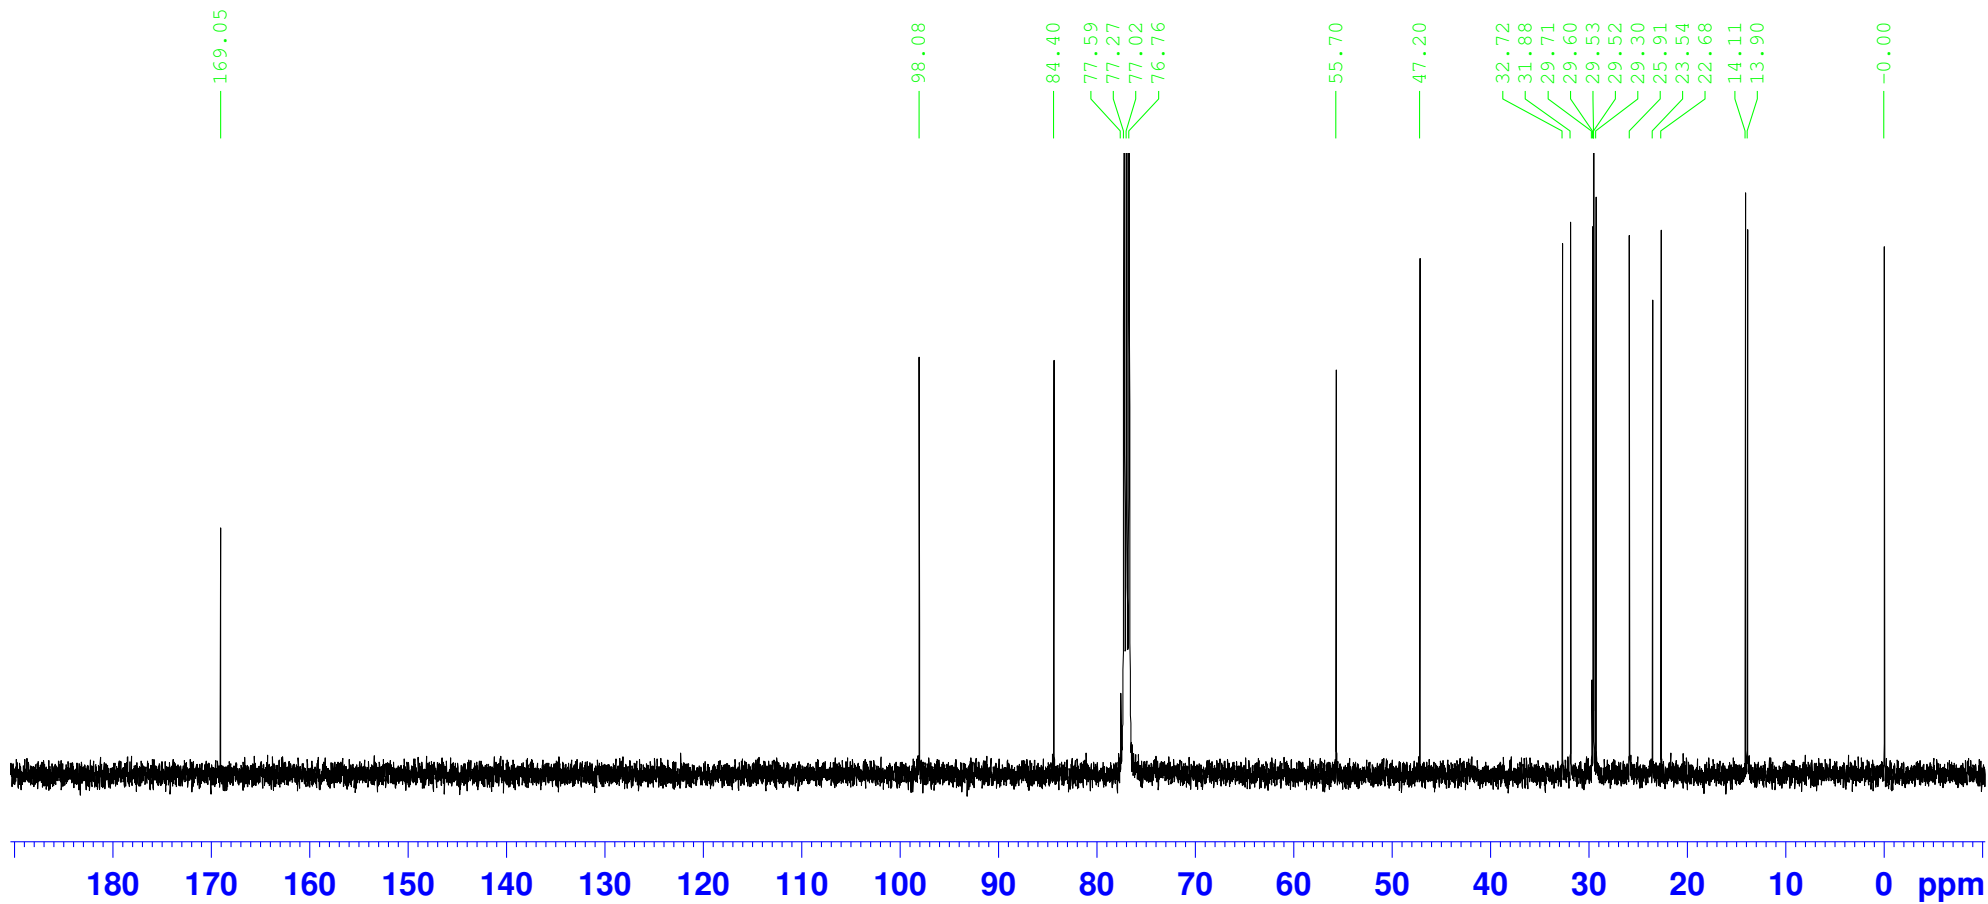

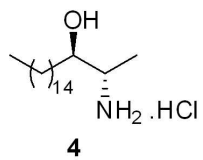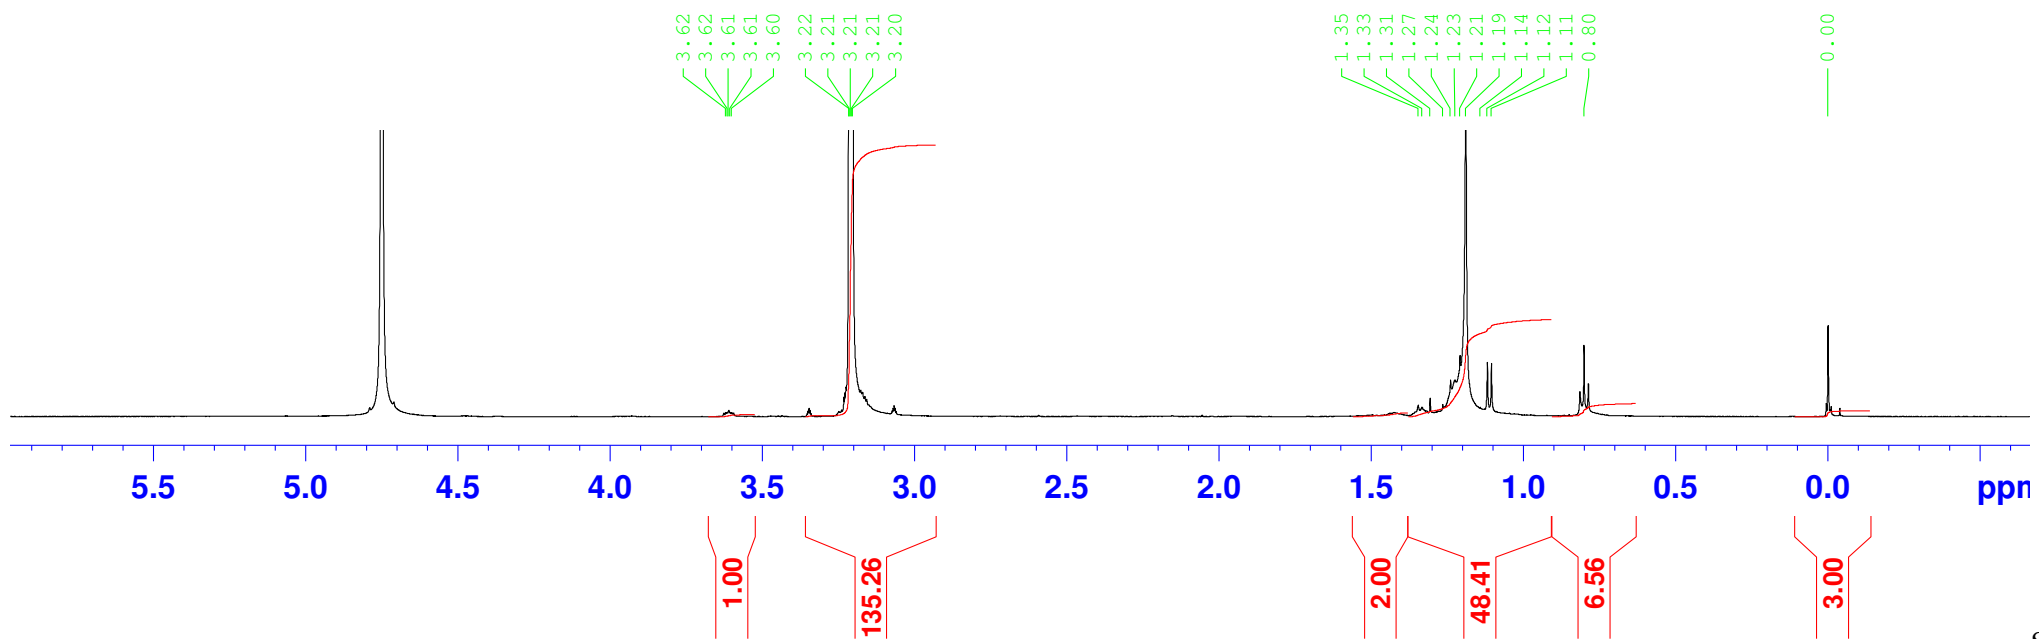



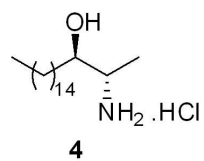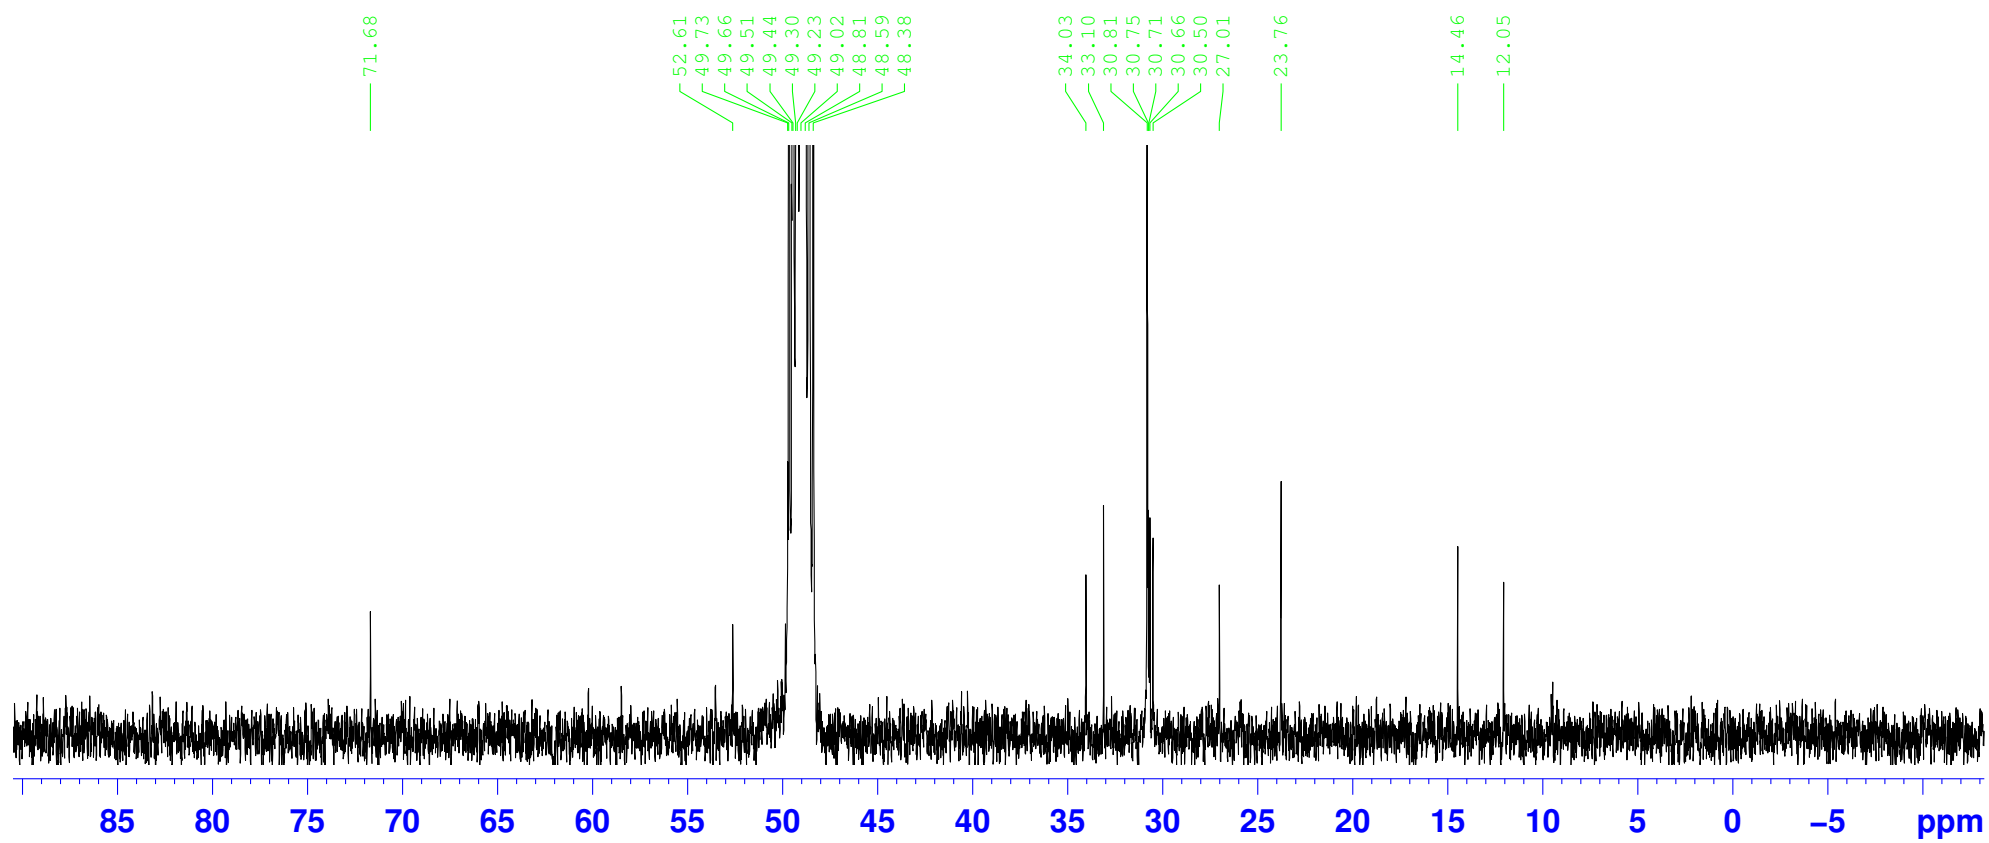

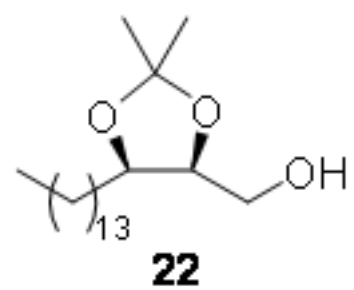

7.260

4.174  
4.163  
4.159  
4.148  
4.136  
4.133  
4.121  
4.106  
3.635  
3.606  
3.599  
3.590  
3.573  
3.573  
3.572  
3.572  
3.571  
3.563

1.942  
1.593  
1.583  
1.561  
1.552  
1.533  
1.516  
1.498  
1.482  
1.466  
1.444  
1.430  
1.425  
1.408  
1.399  
1.380  
1.361  
1.325  
1.293  
1.274  
1.248  
0.890  
0.873  
0.856

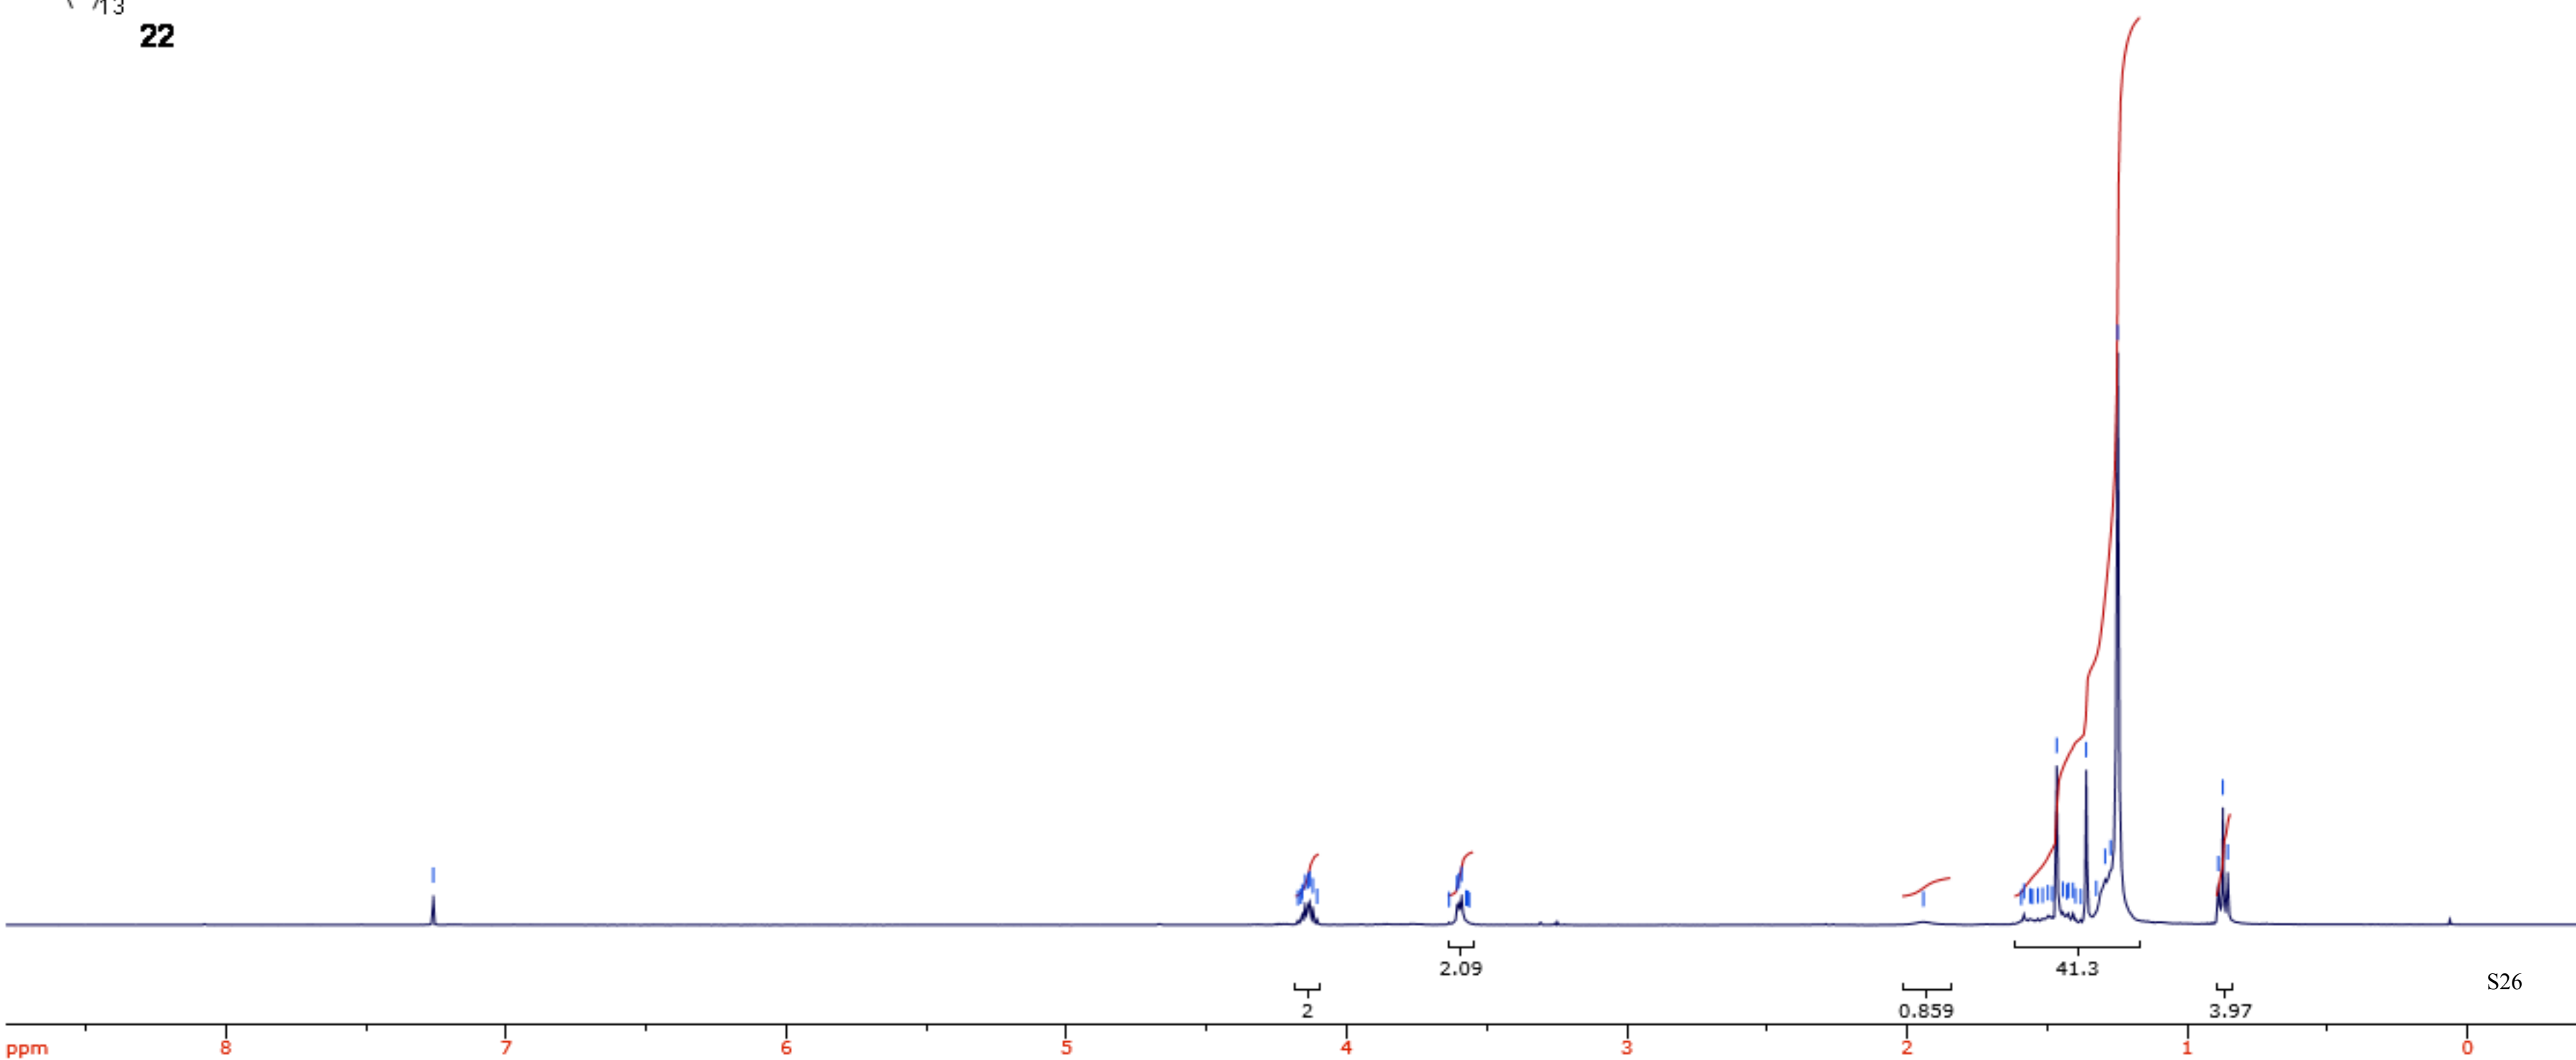

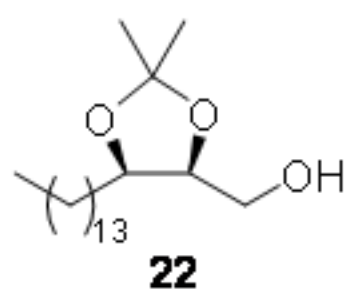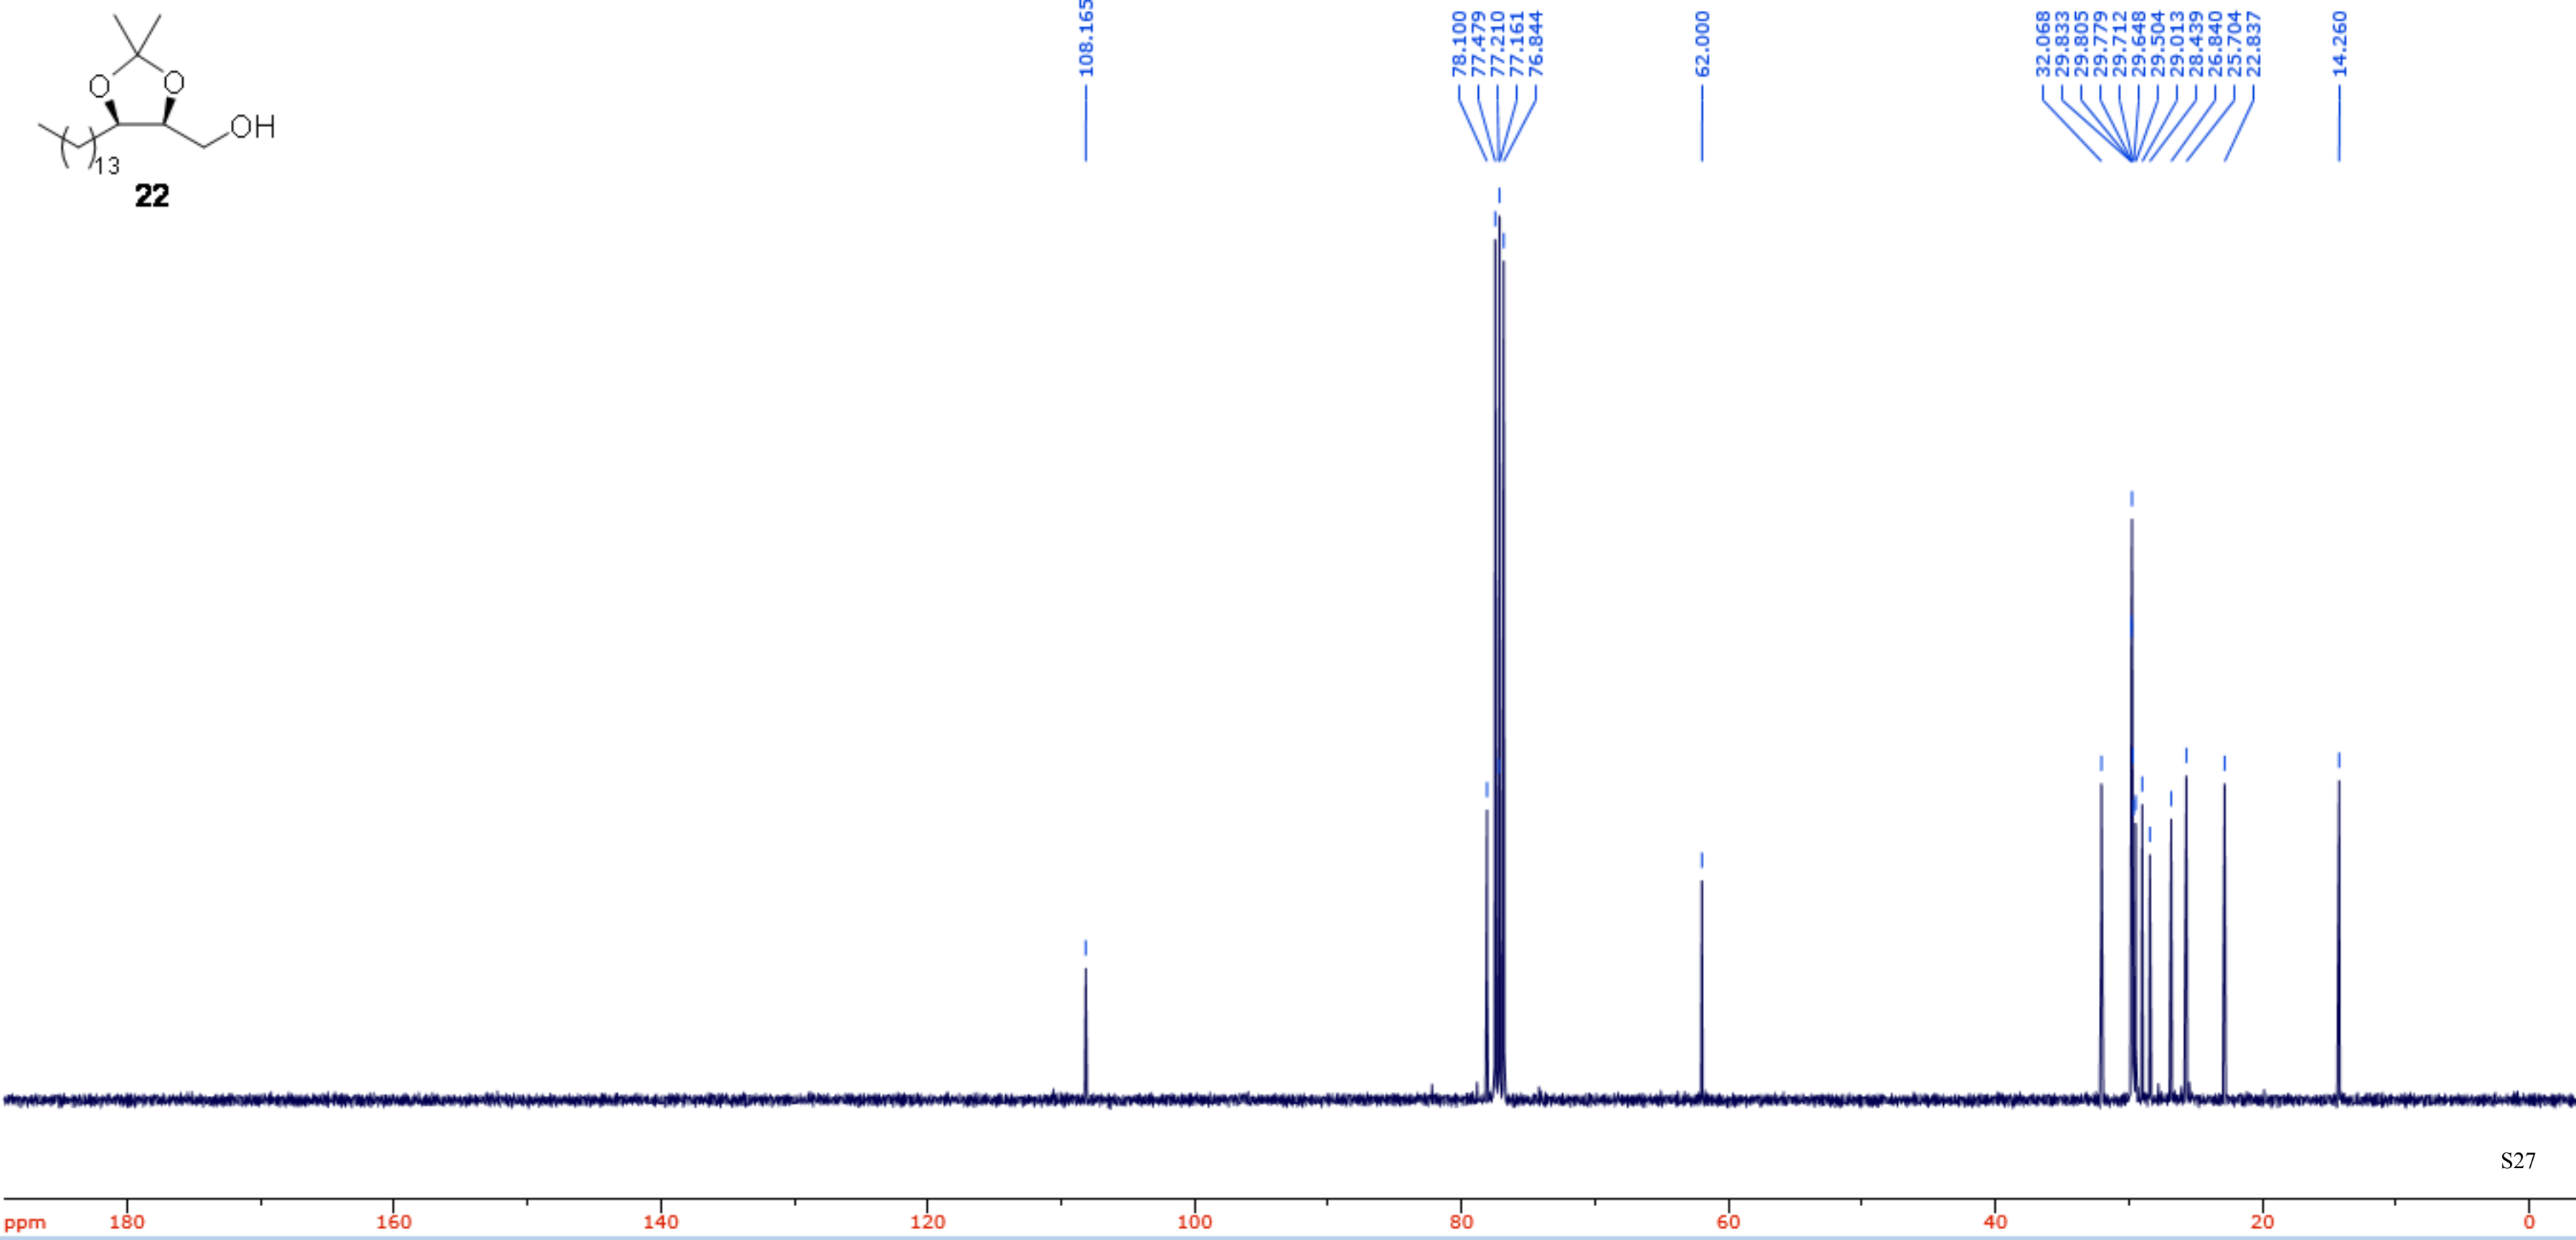

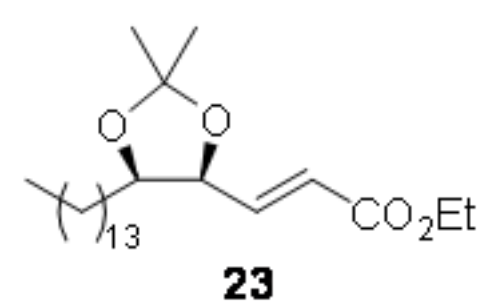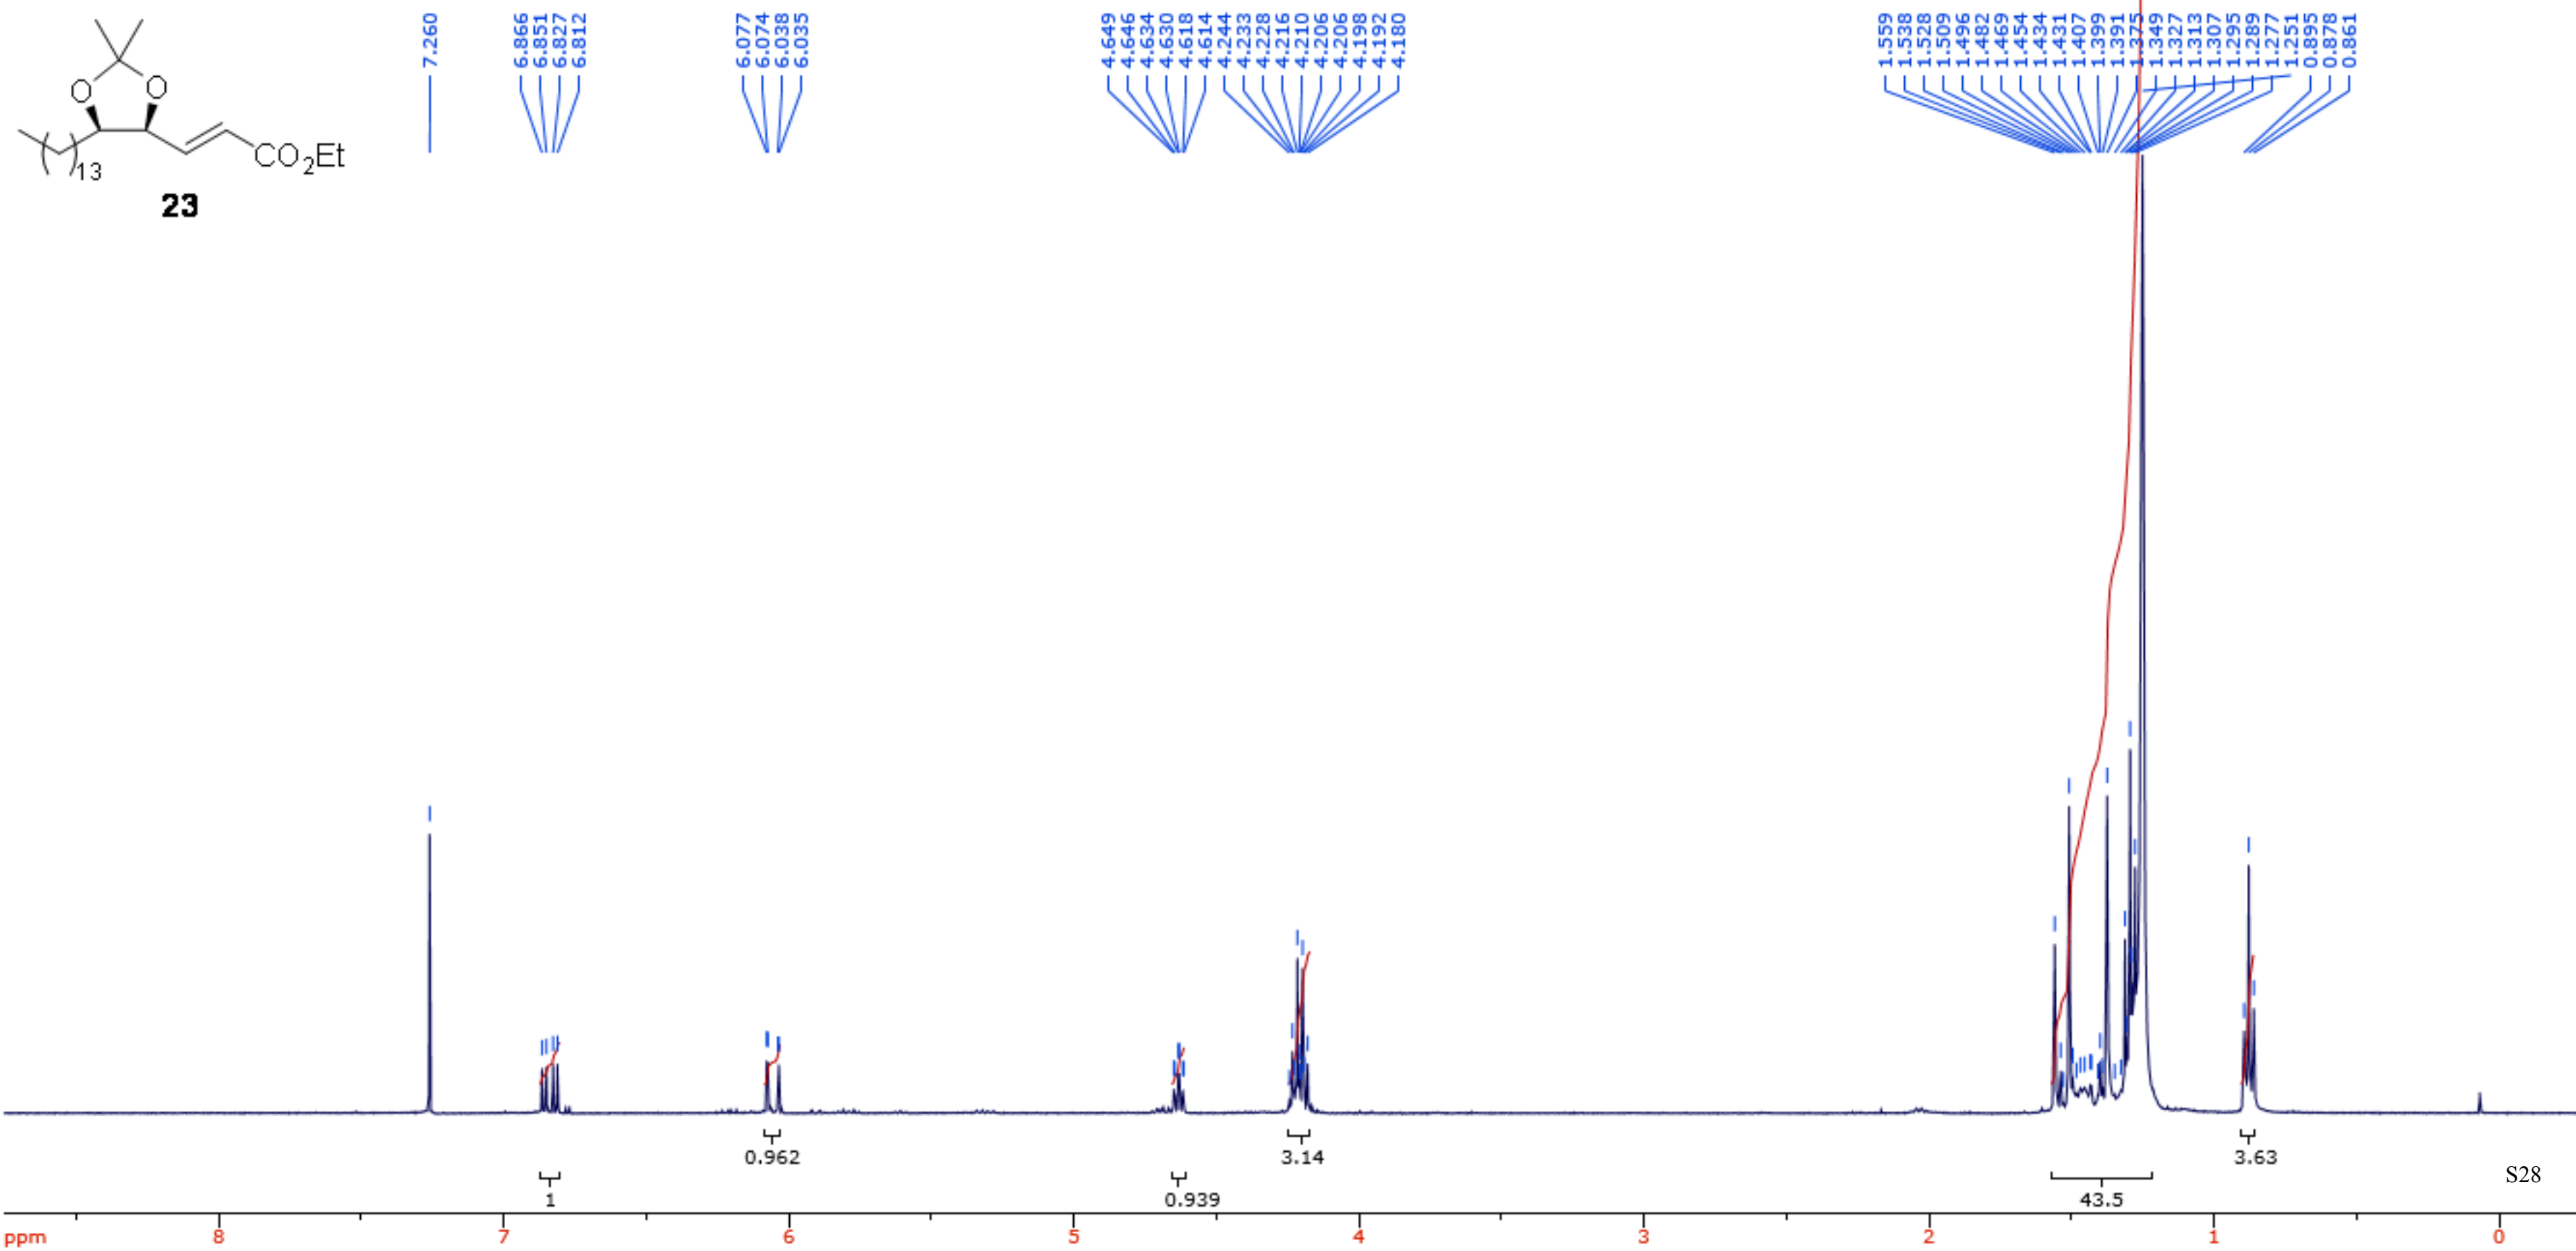

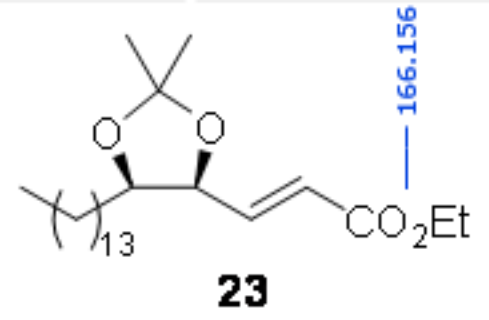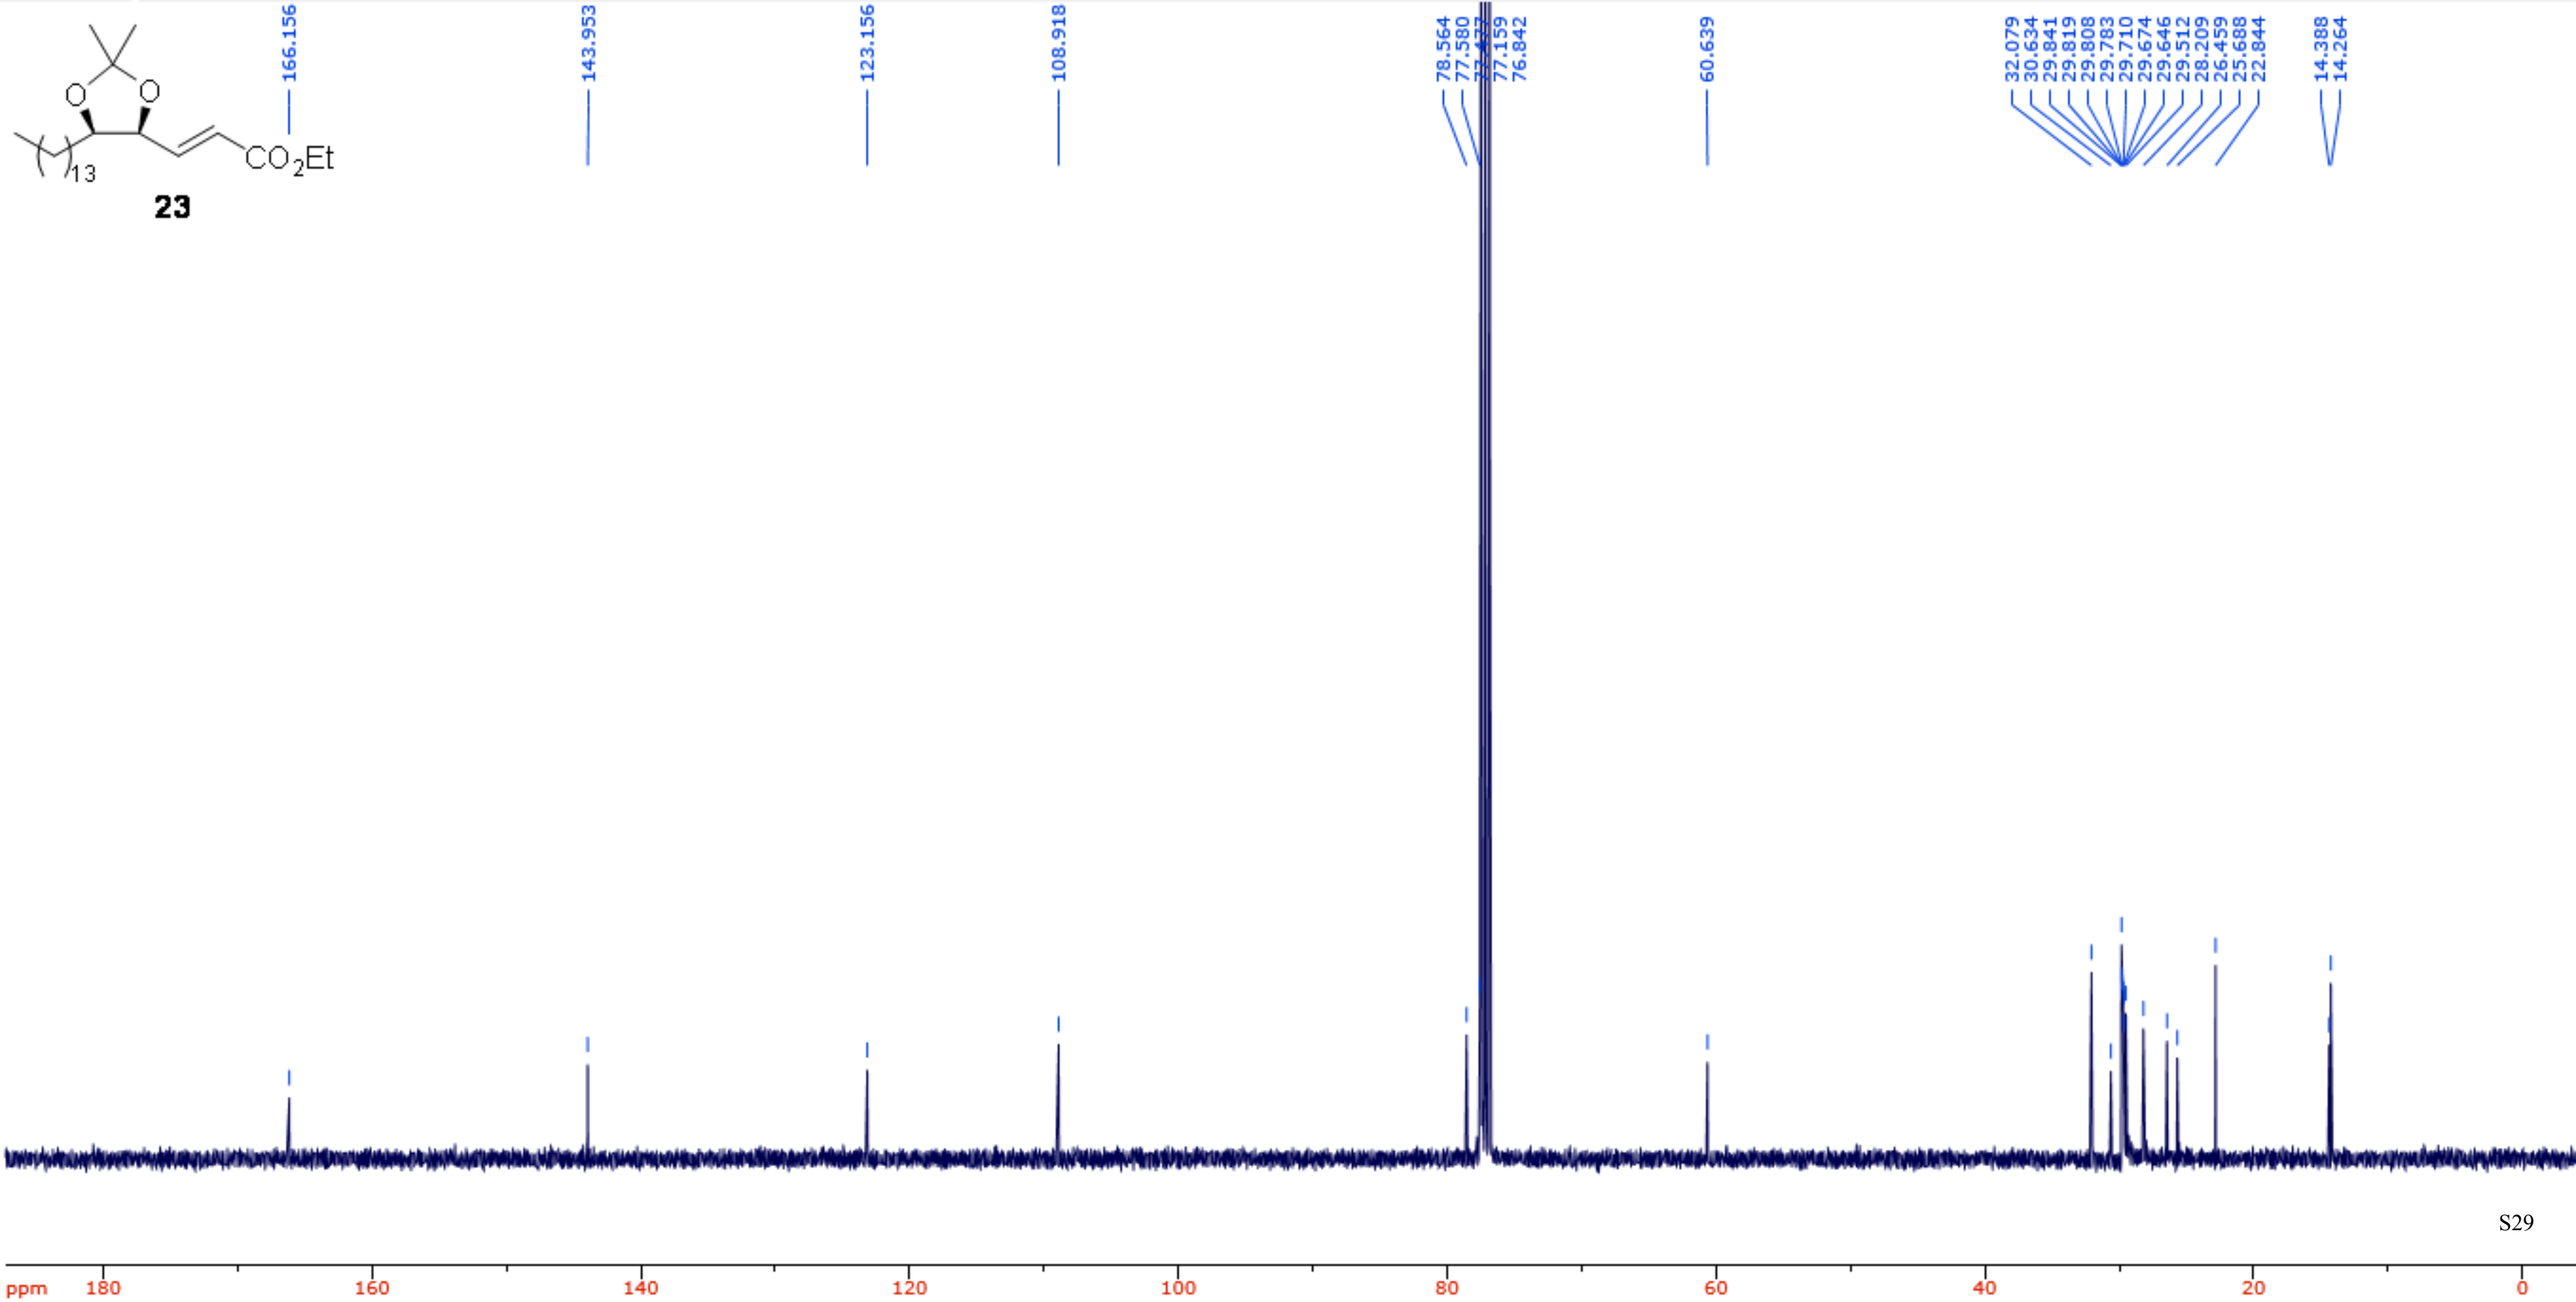

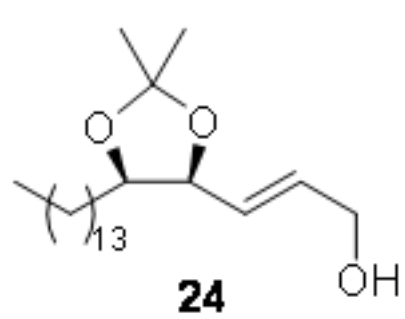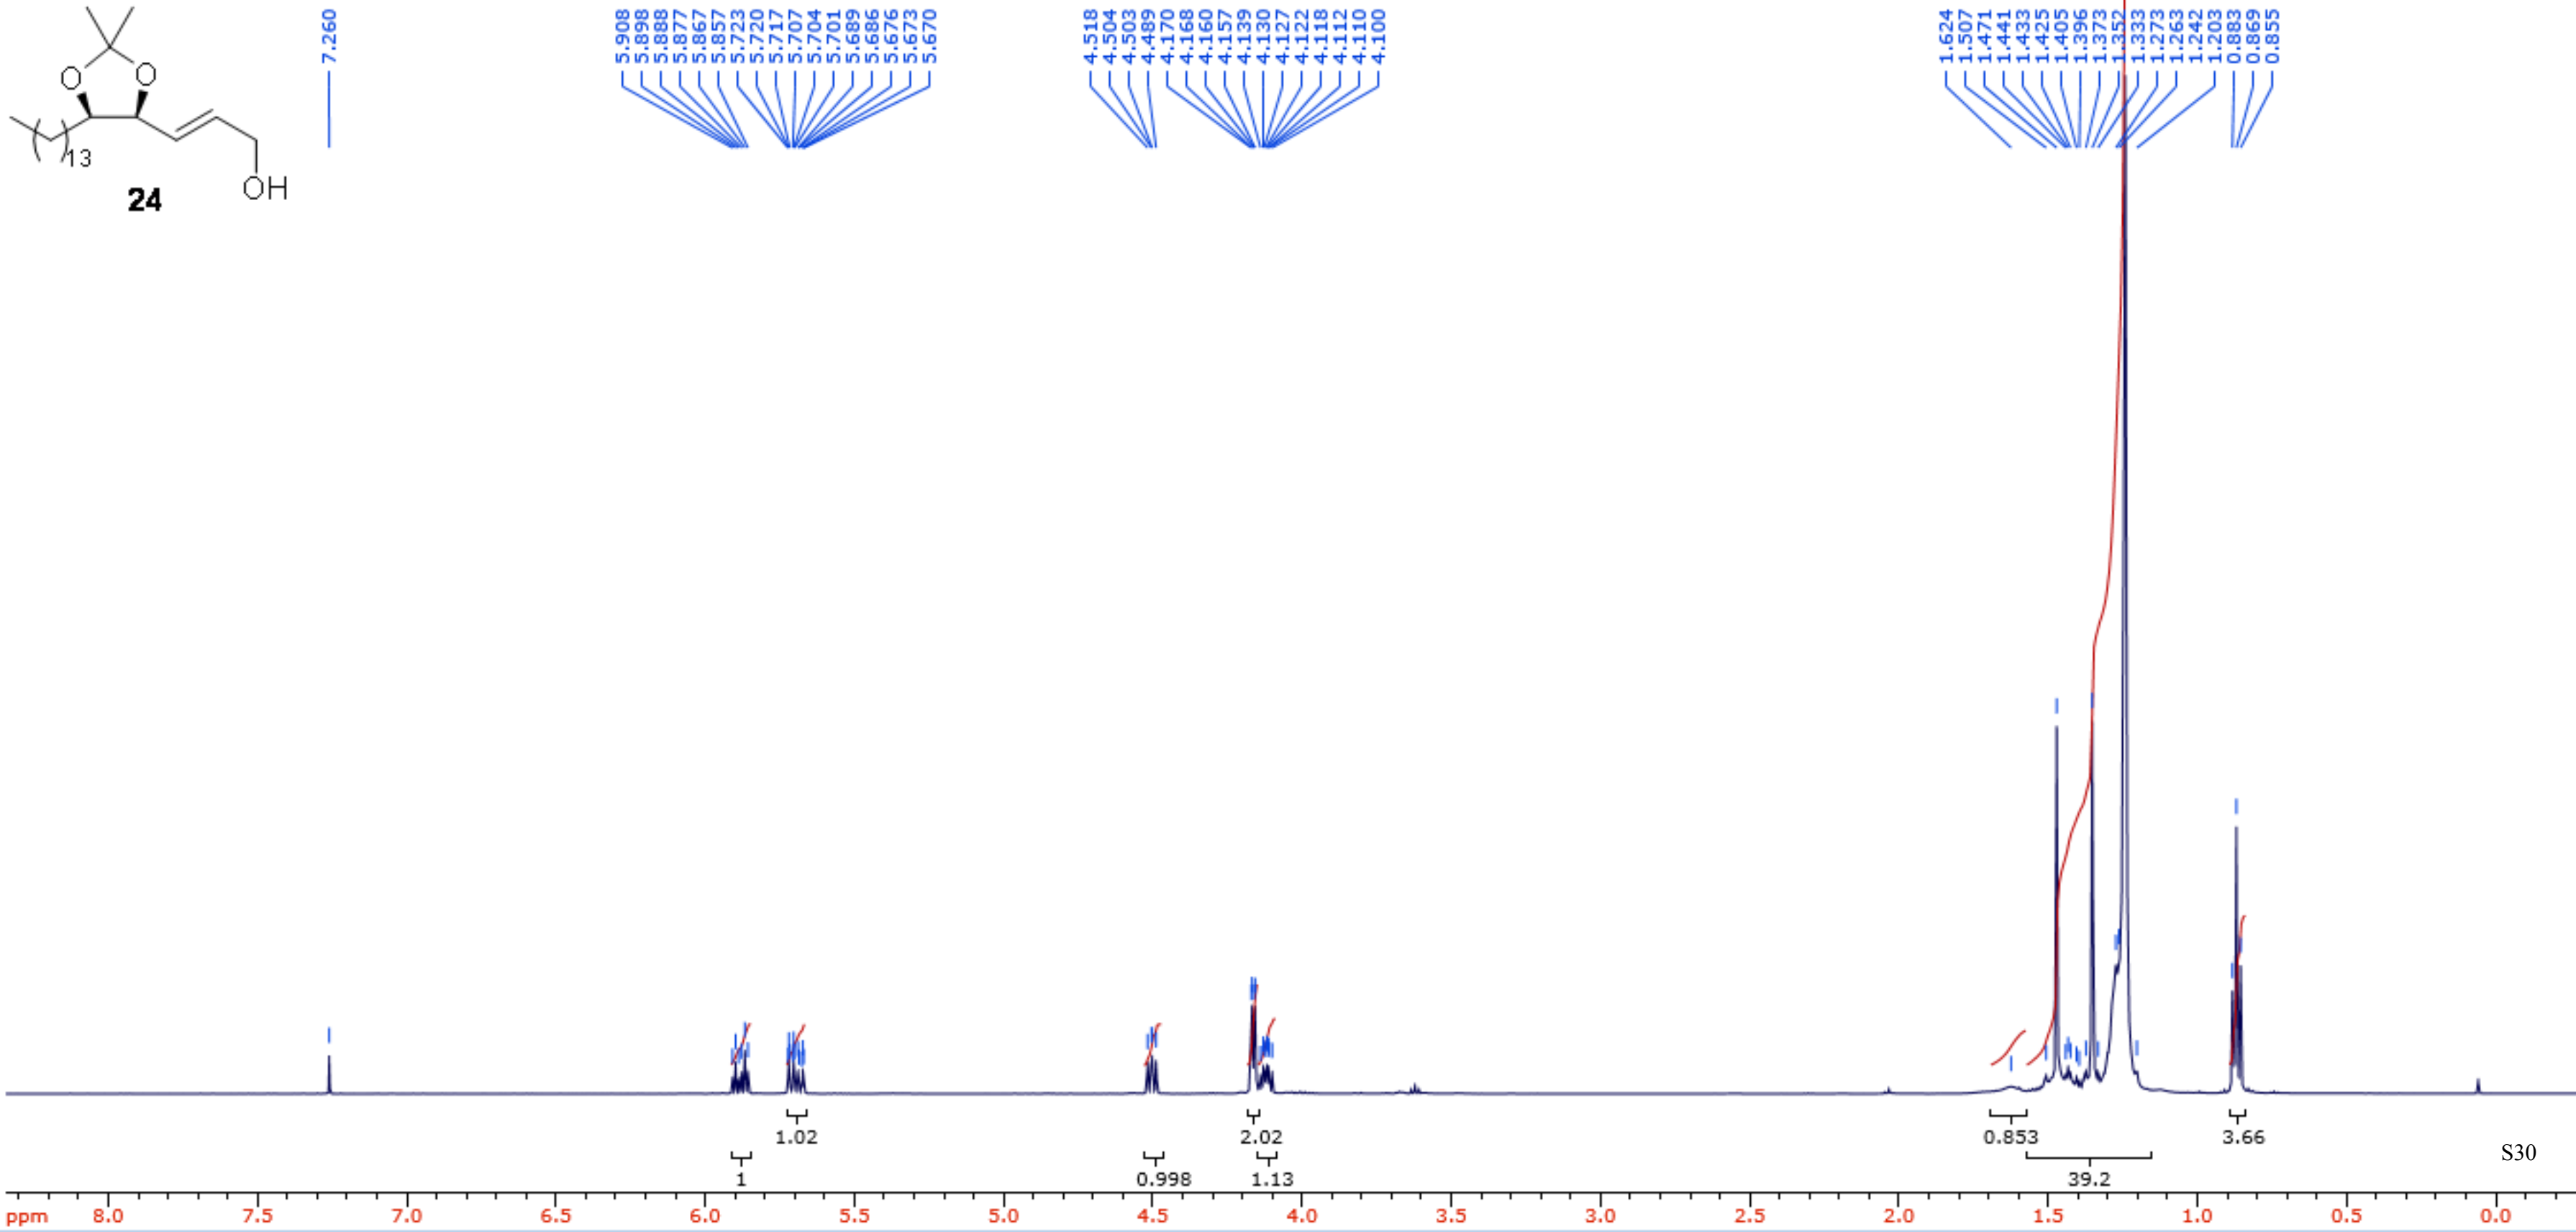

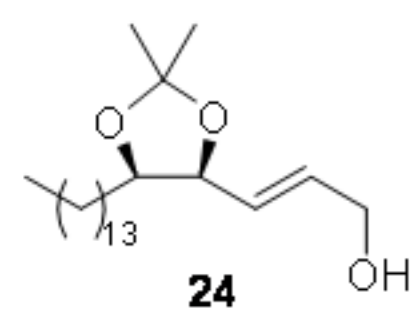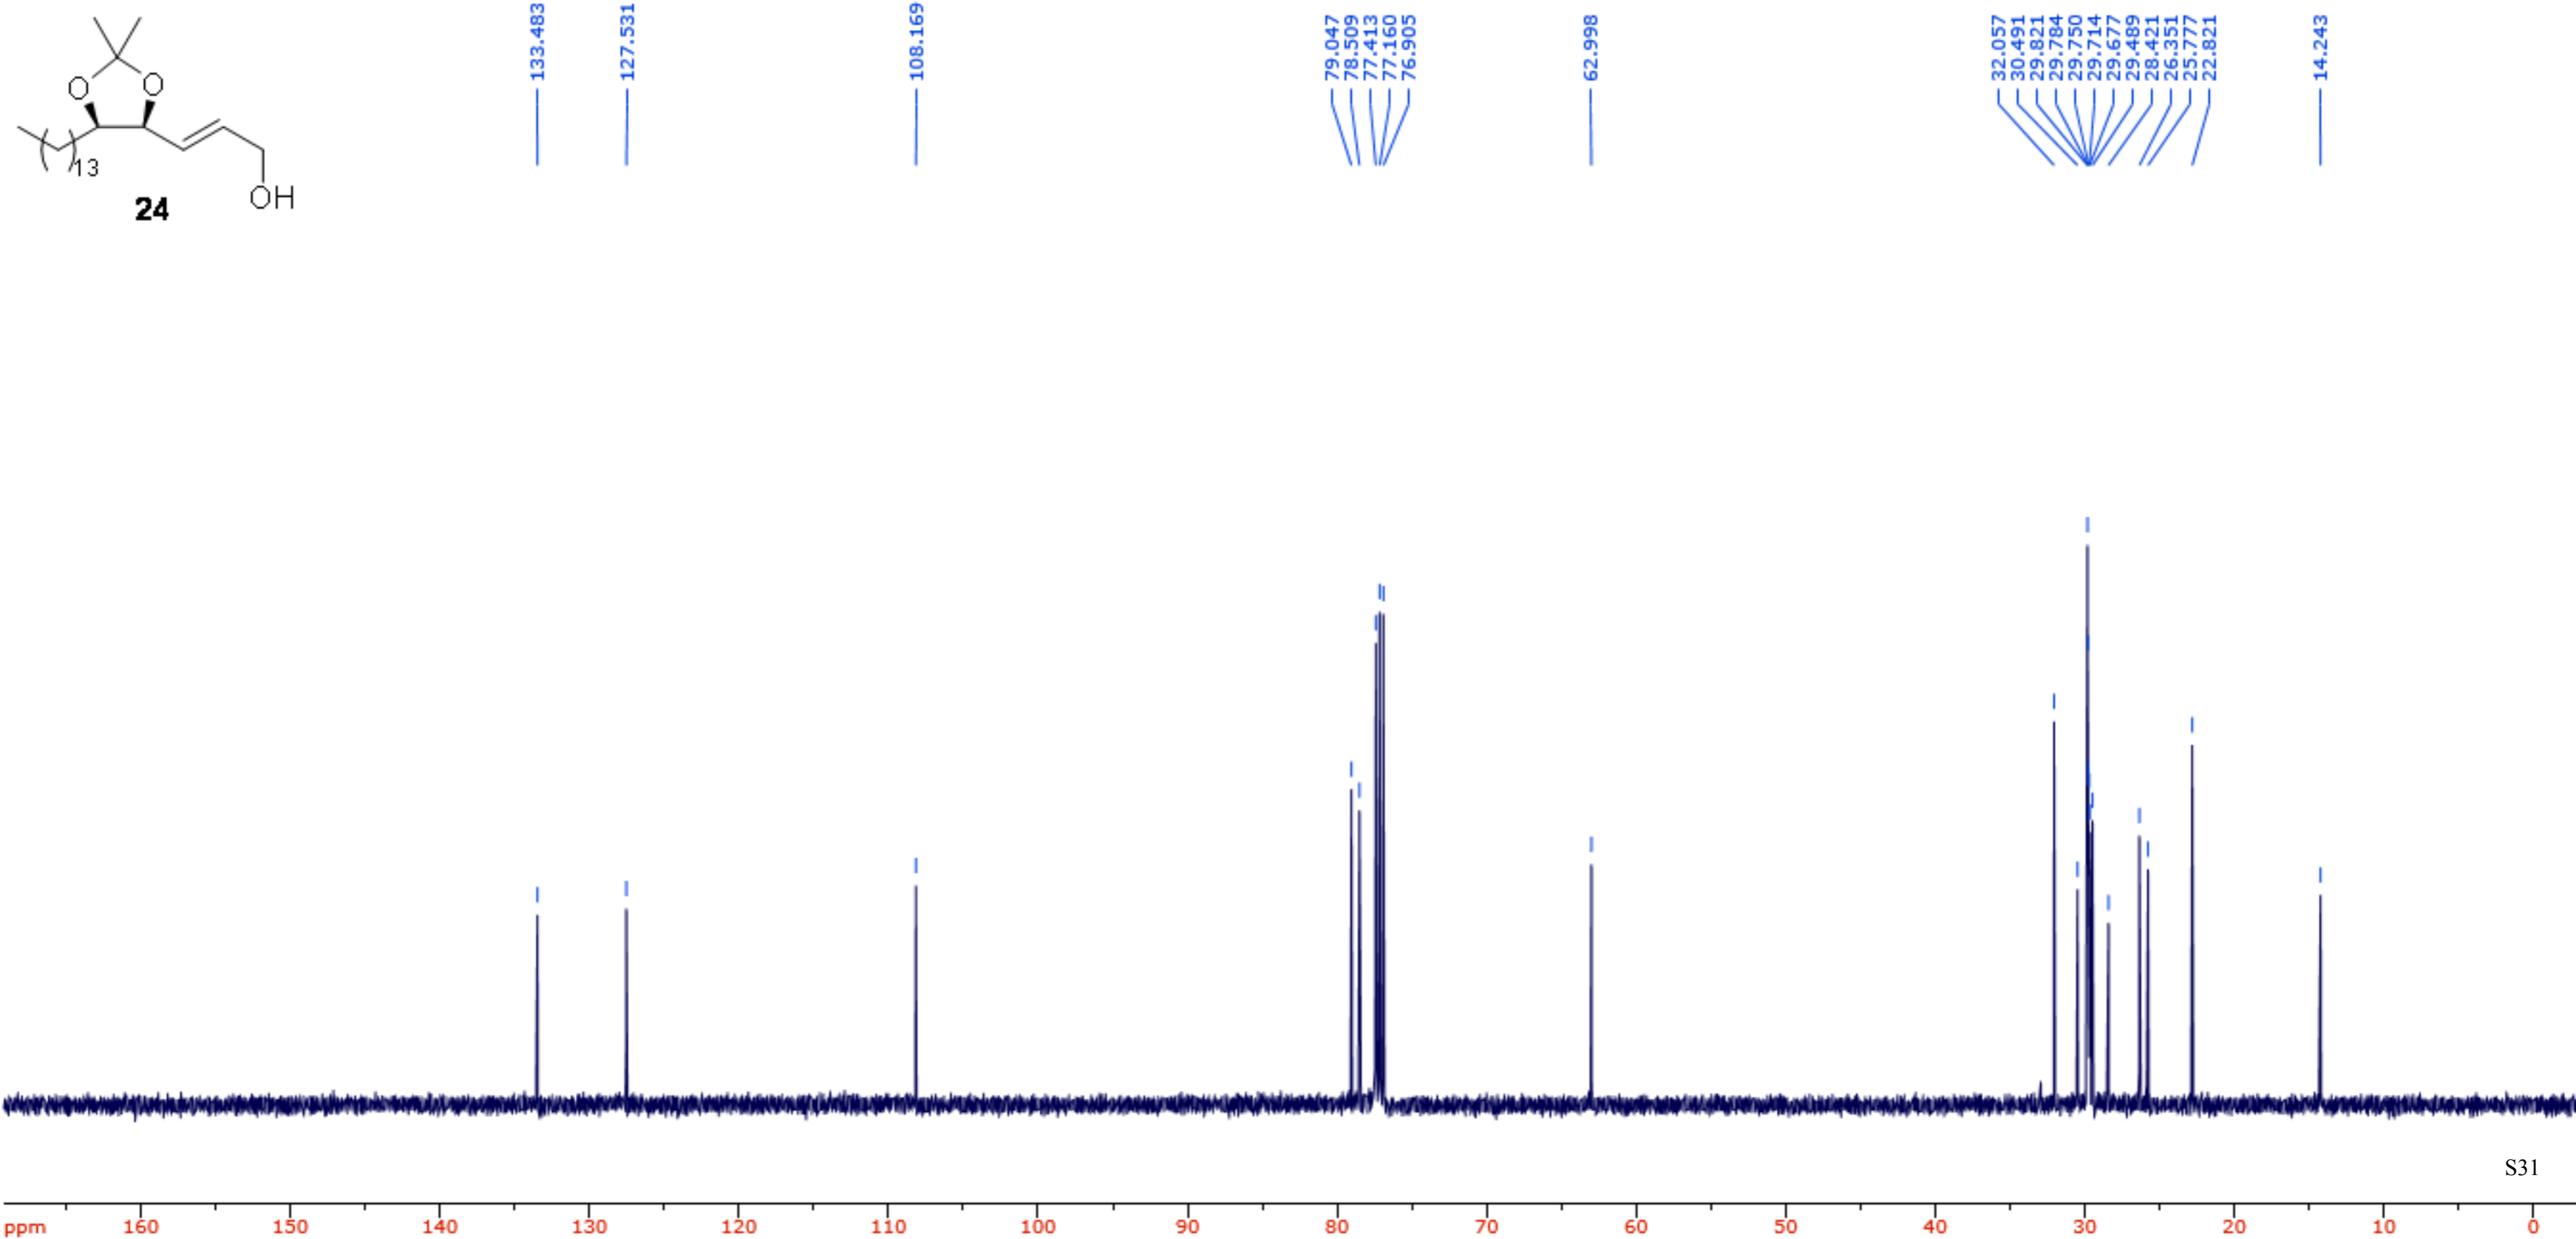

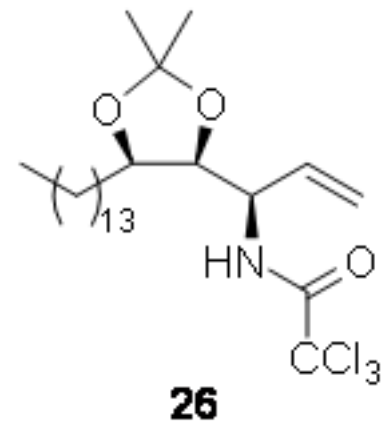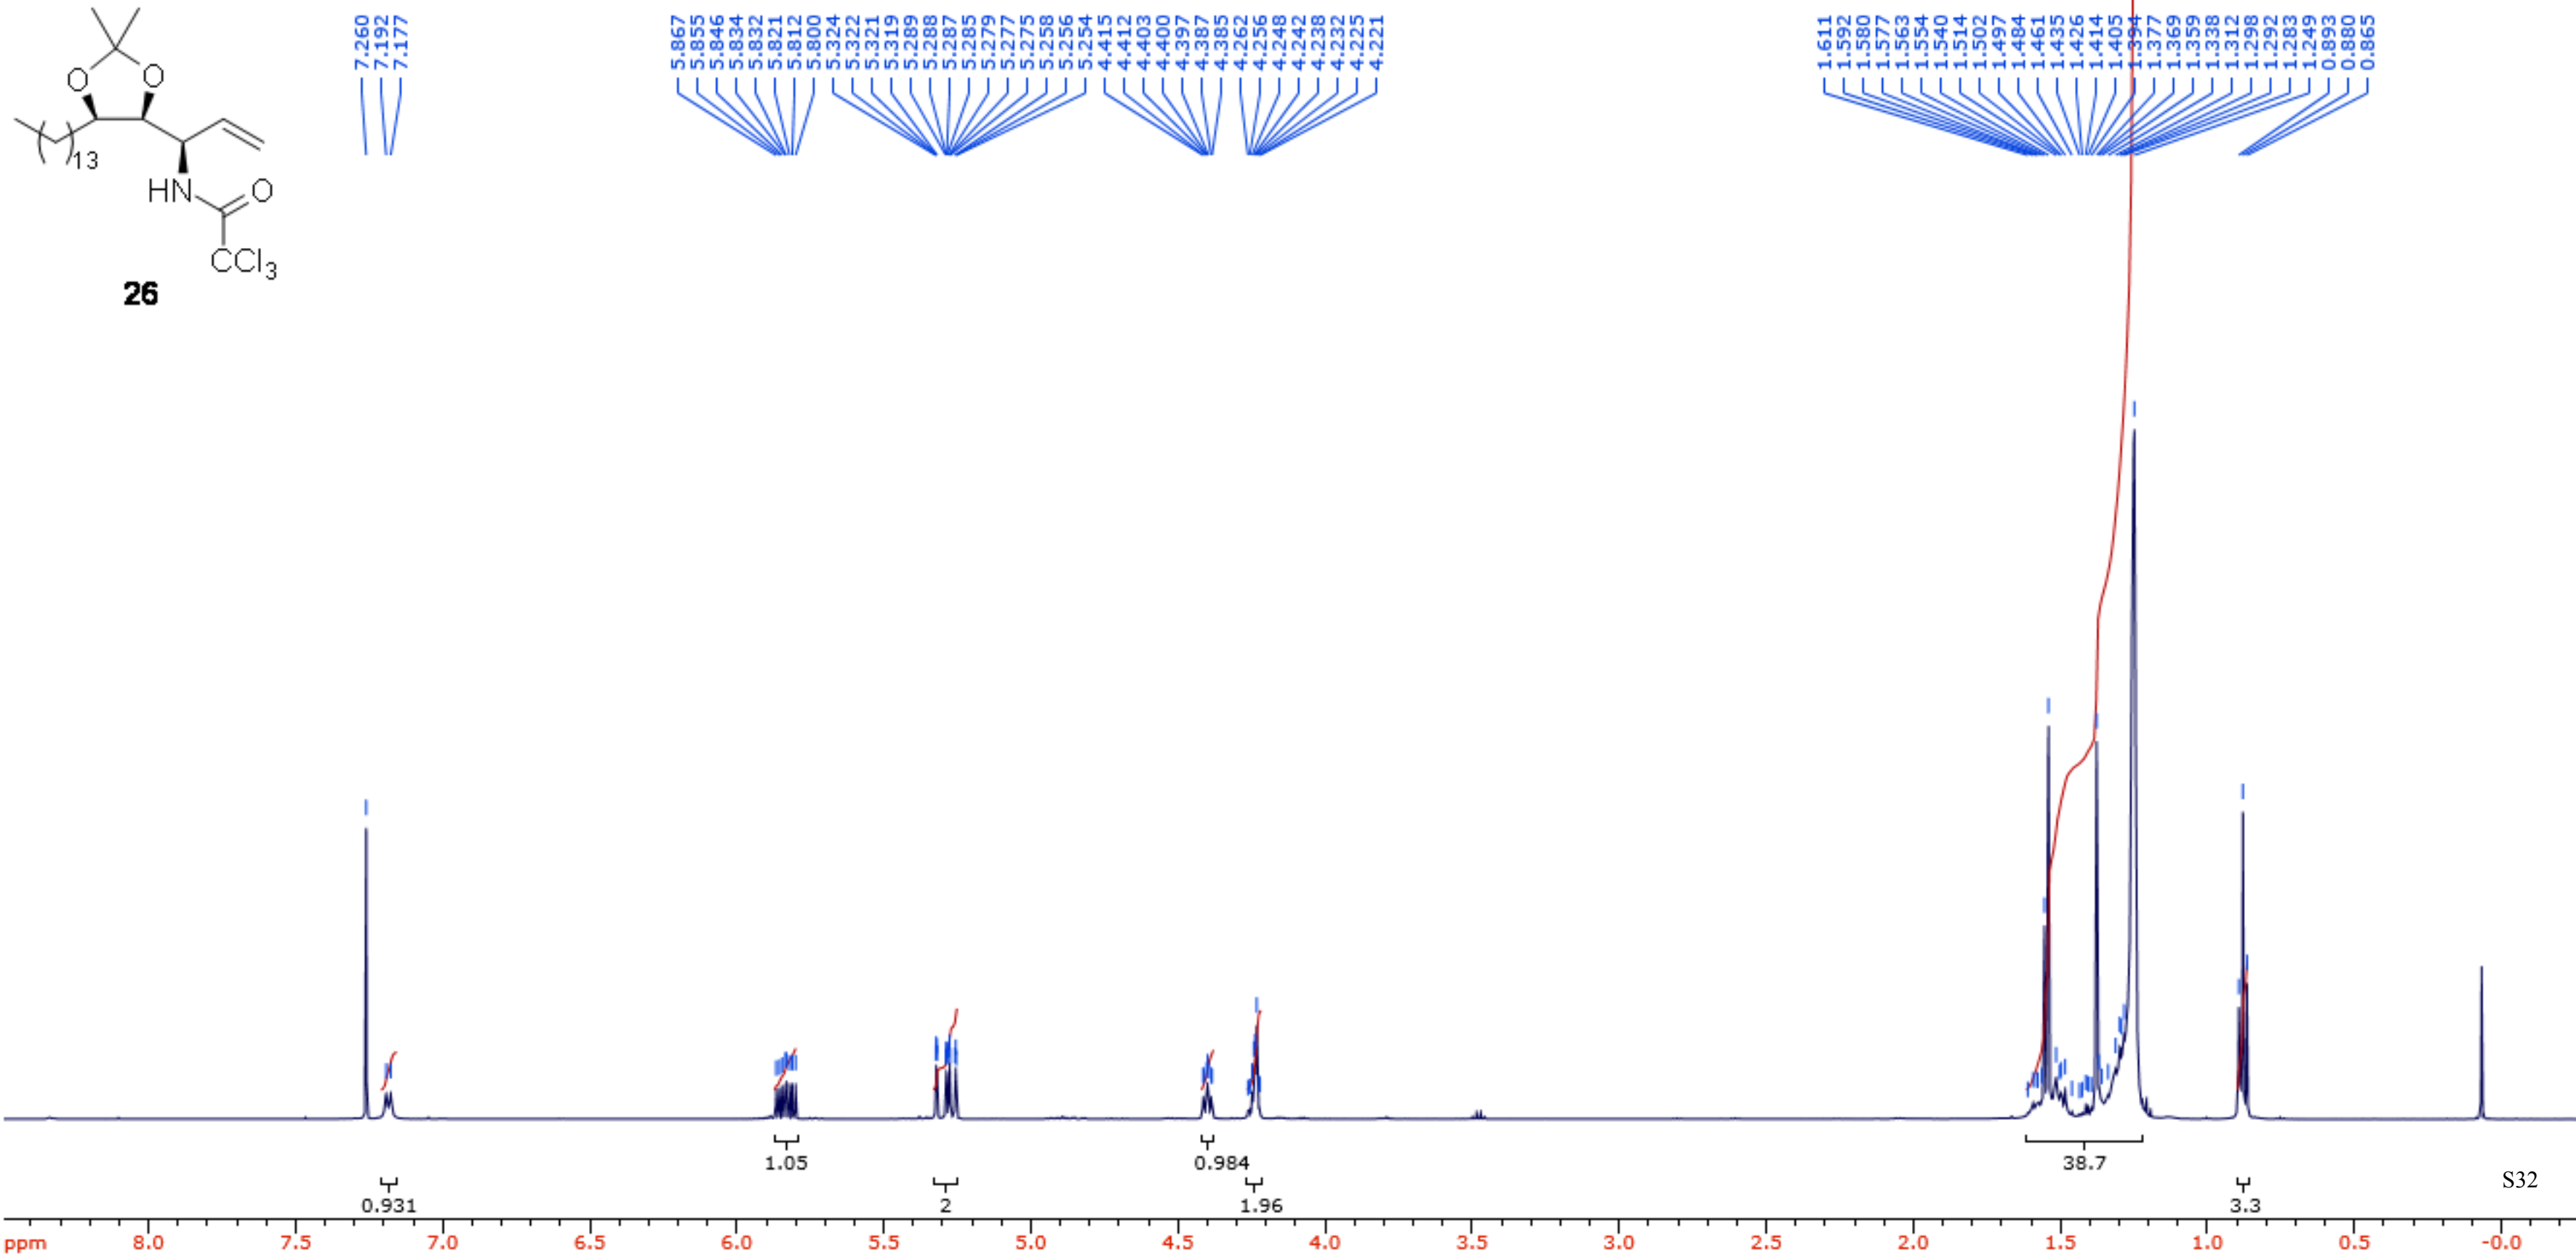



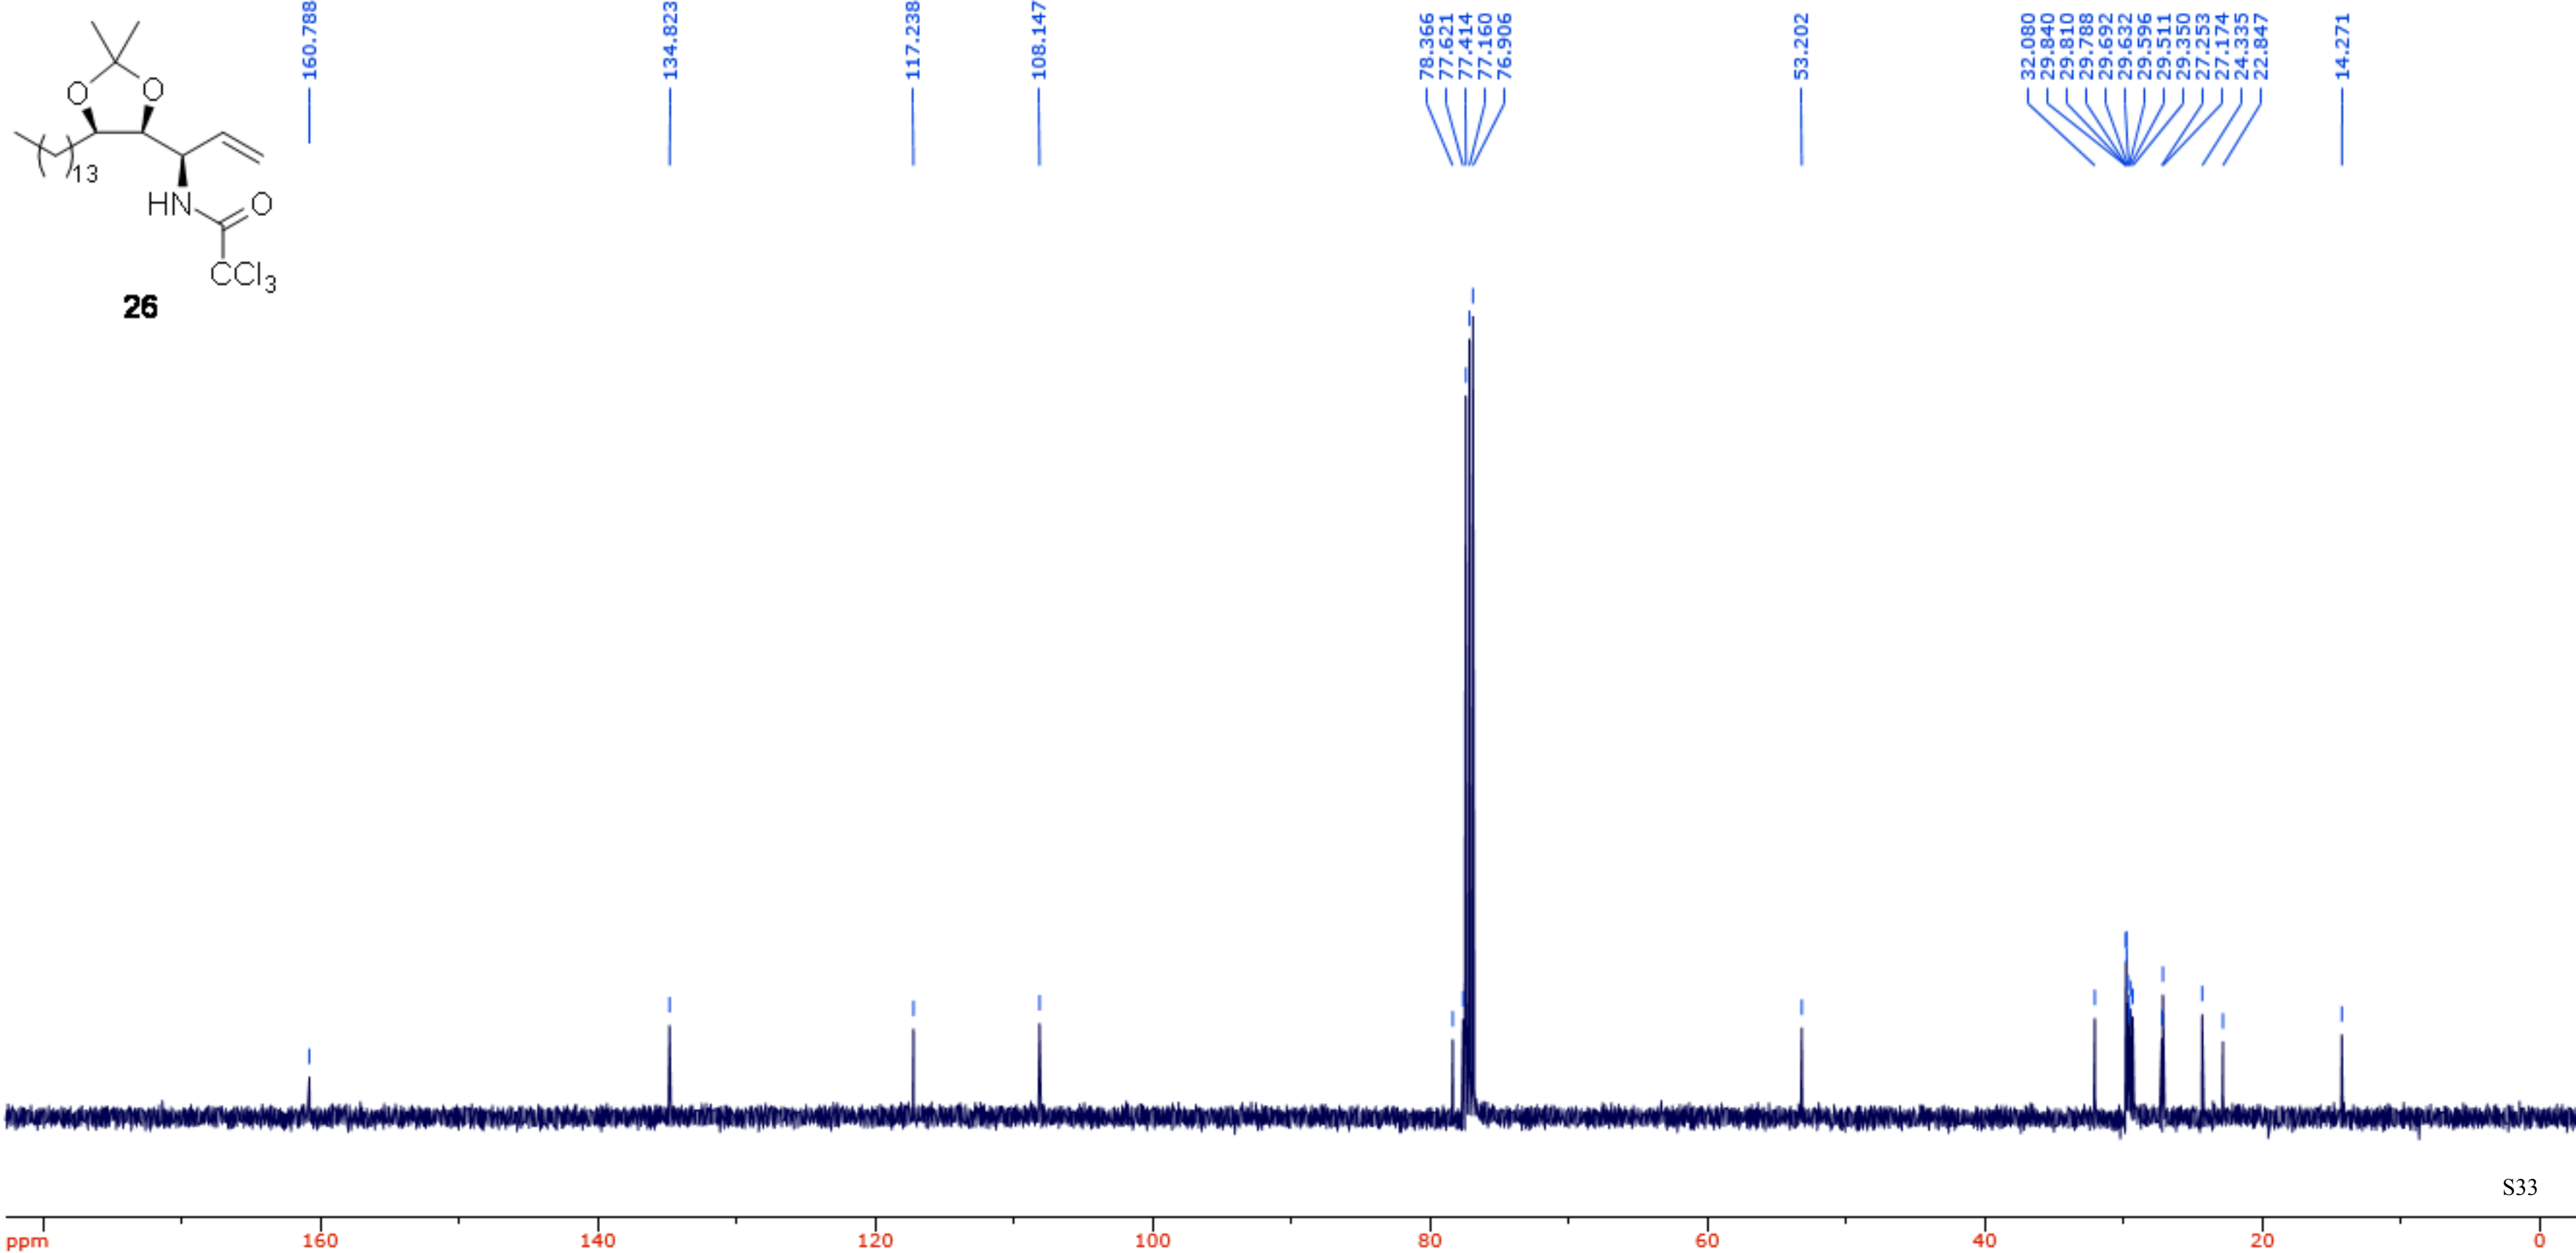

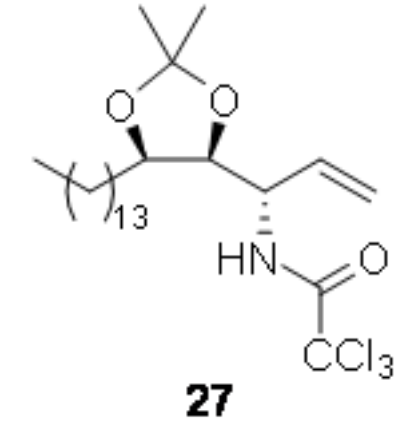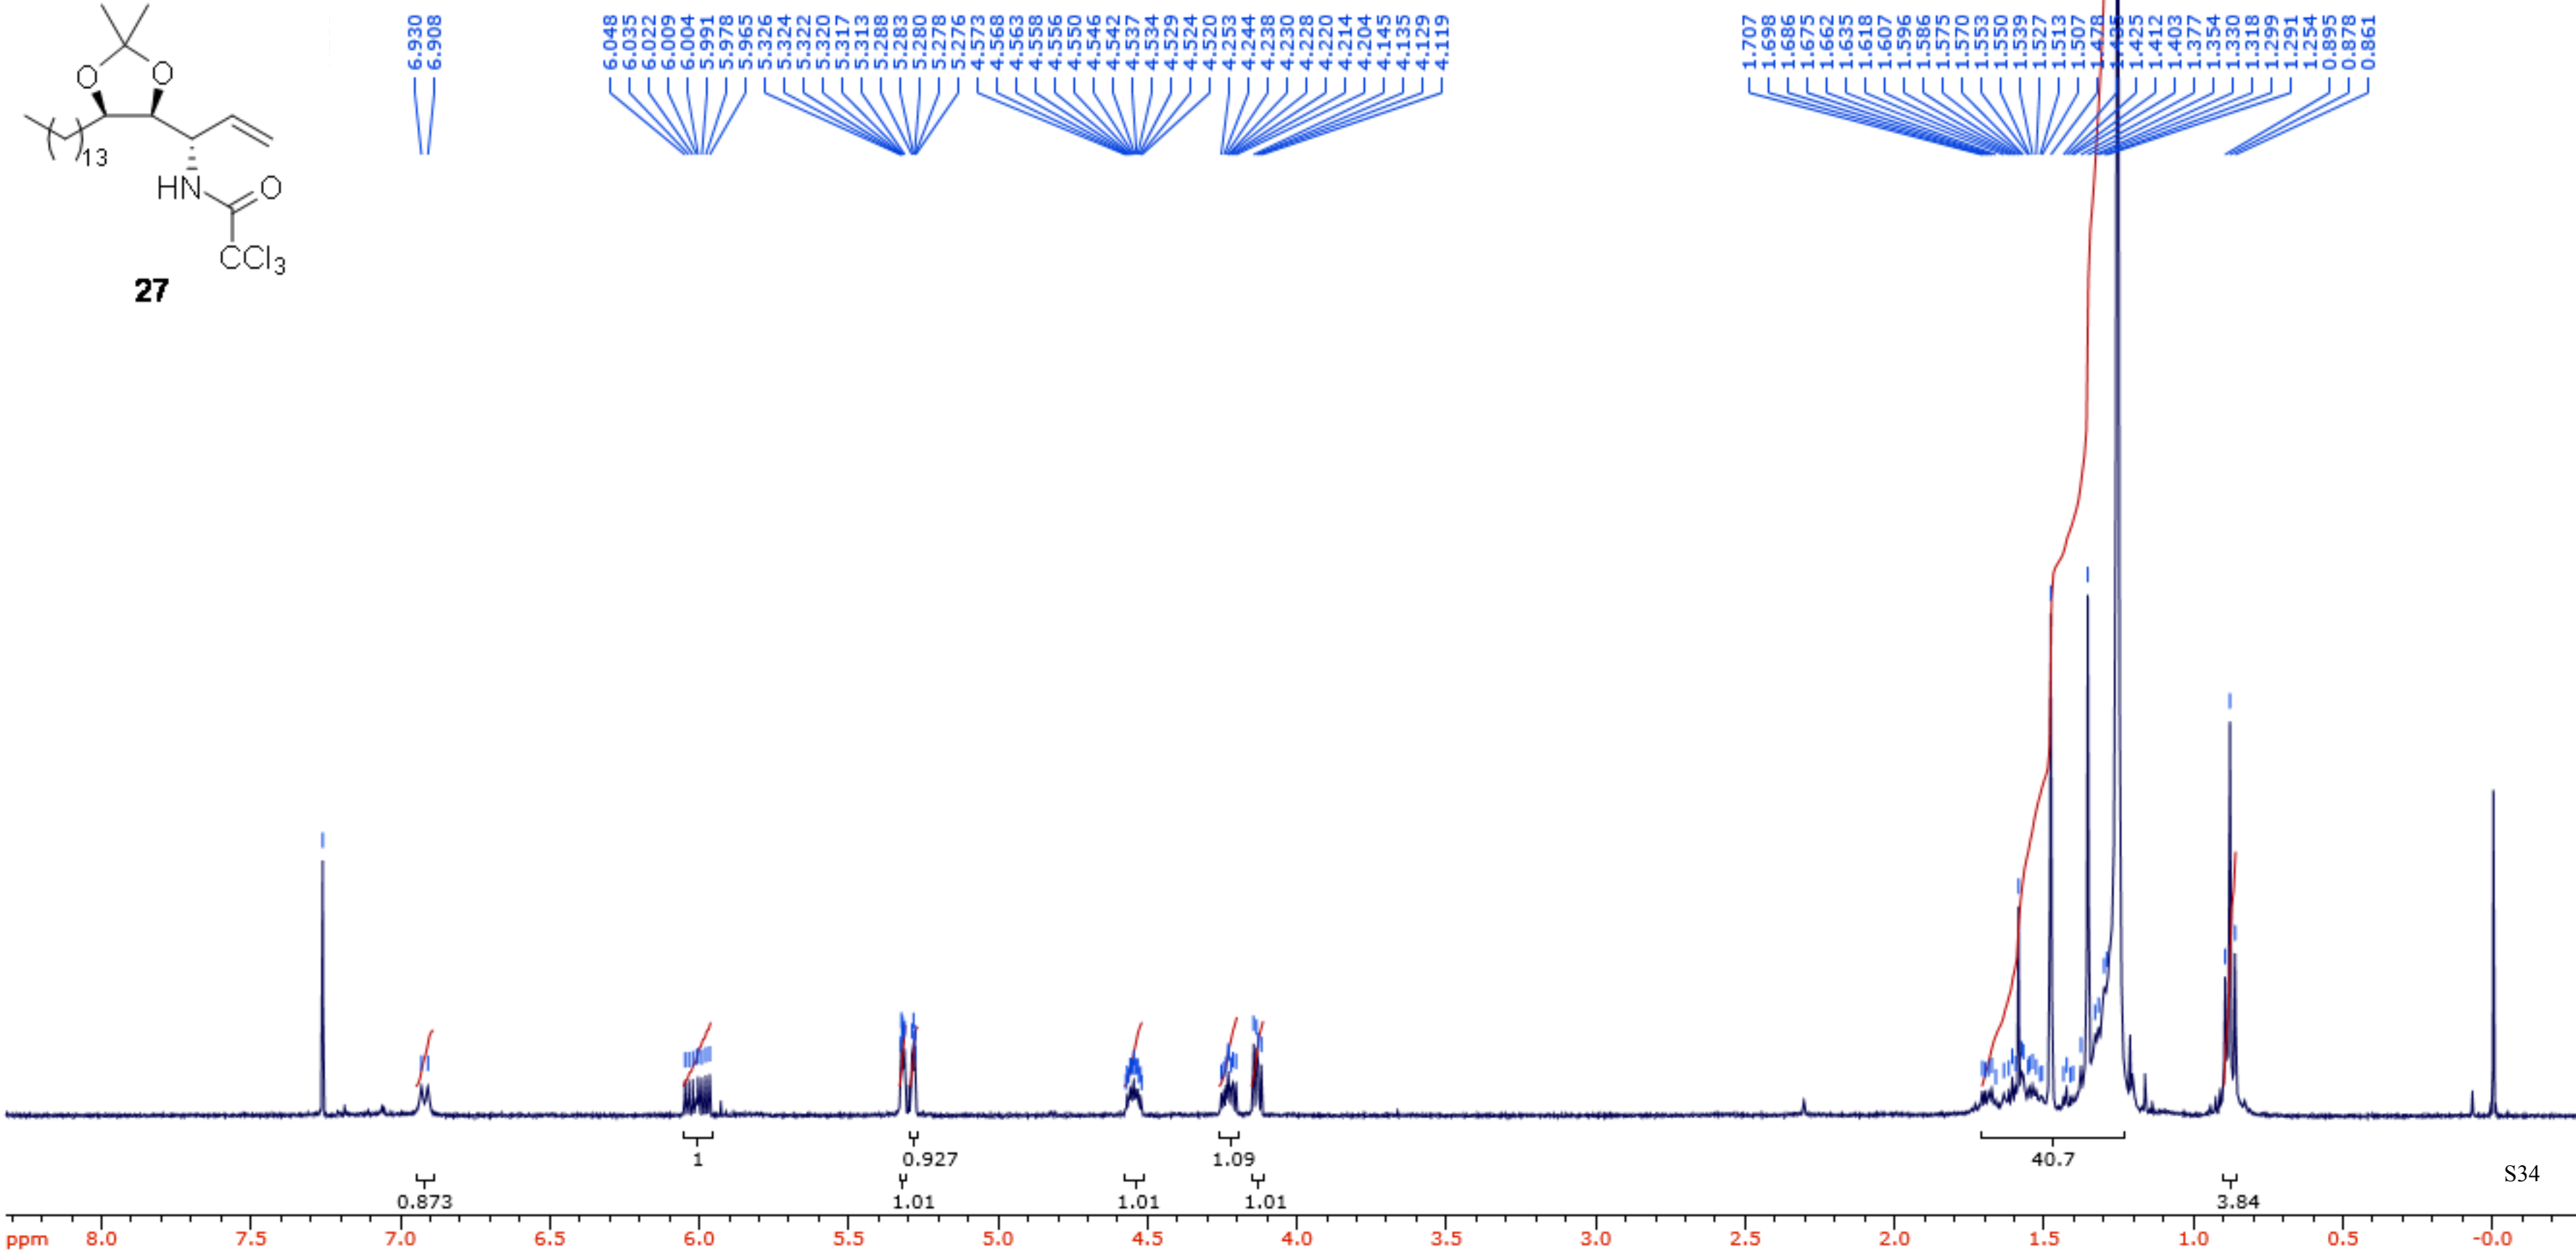

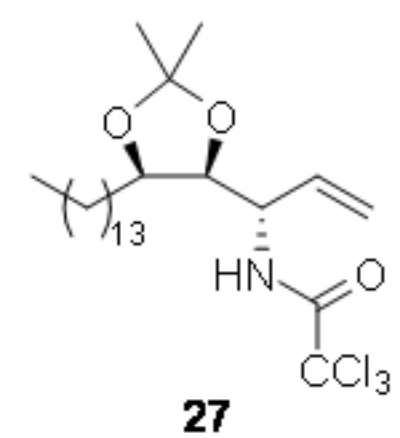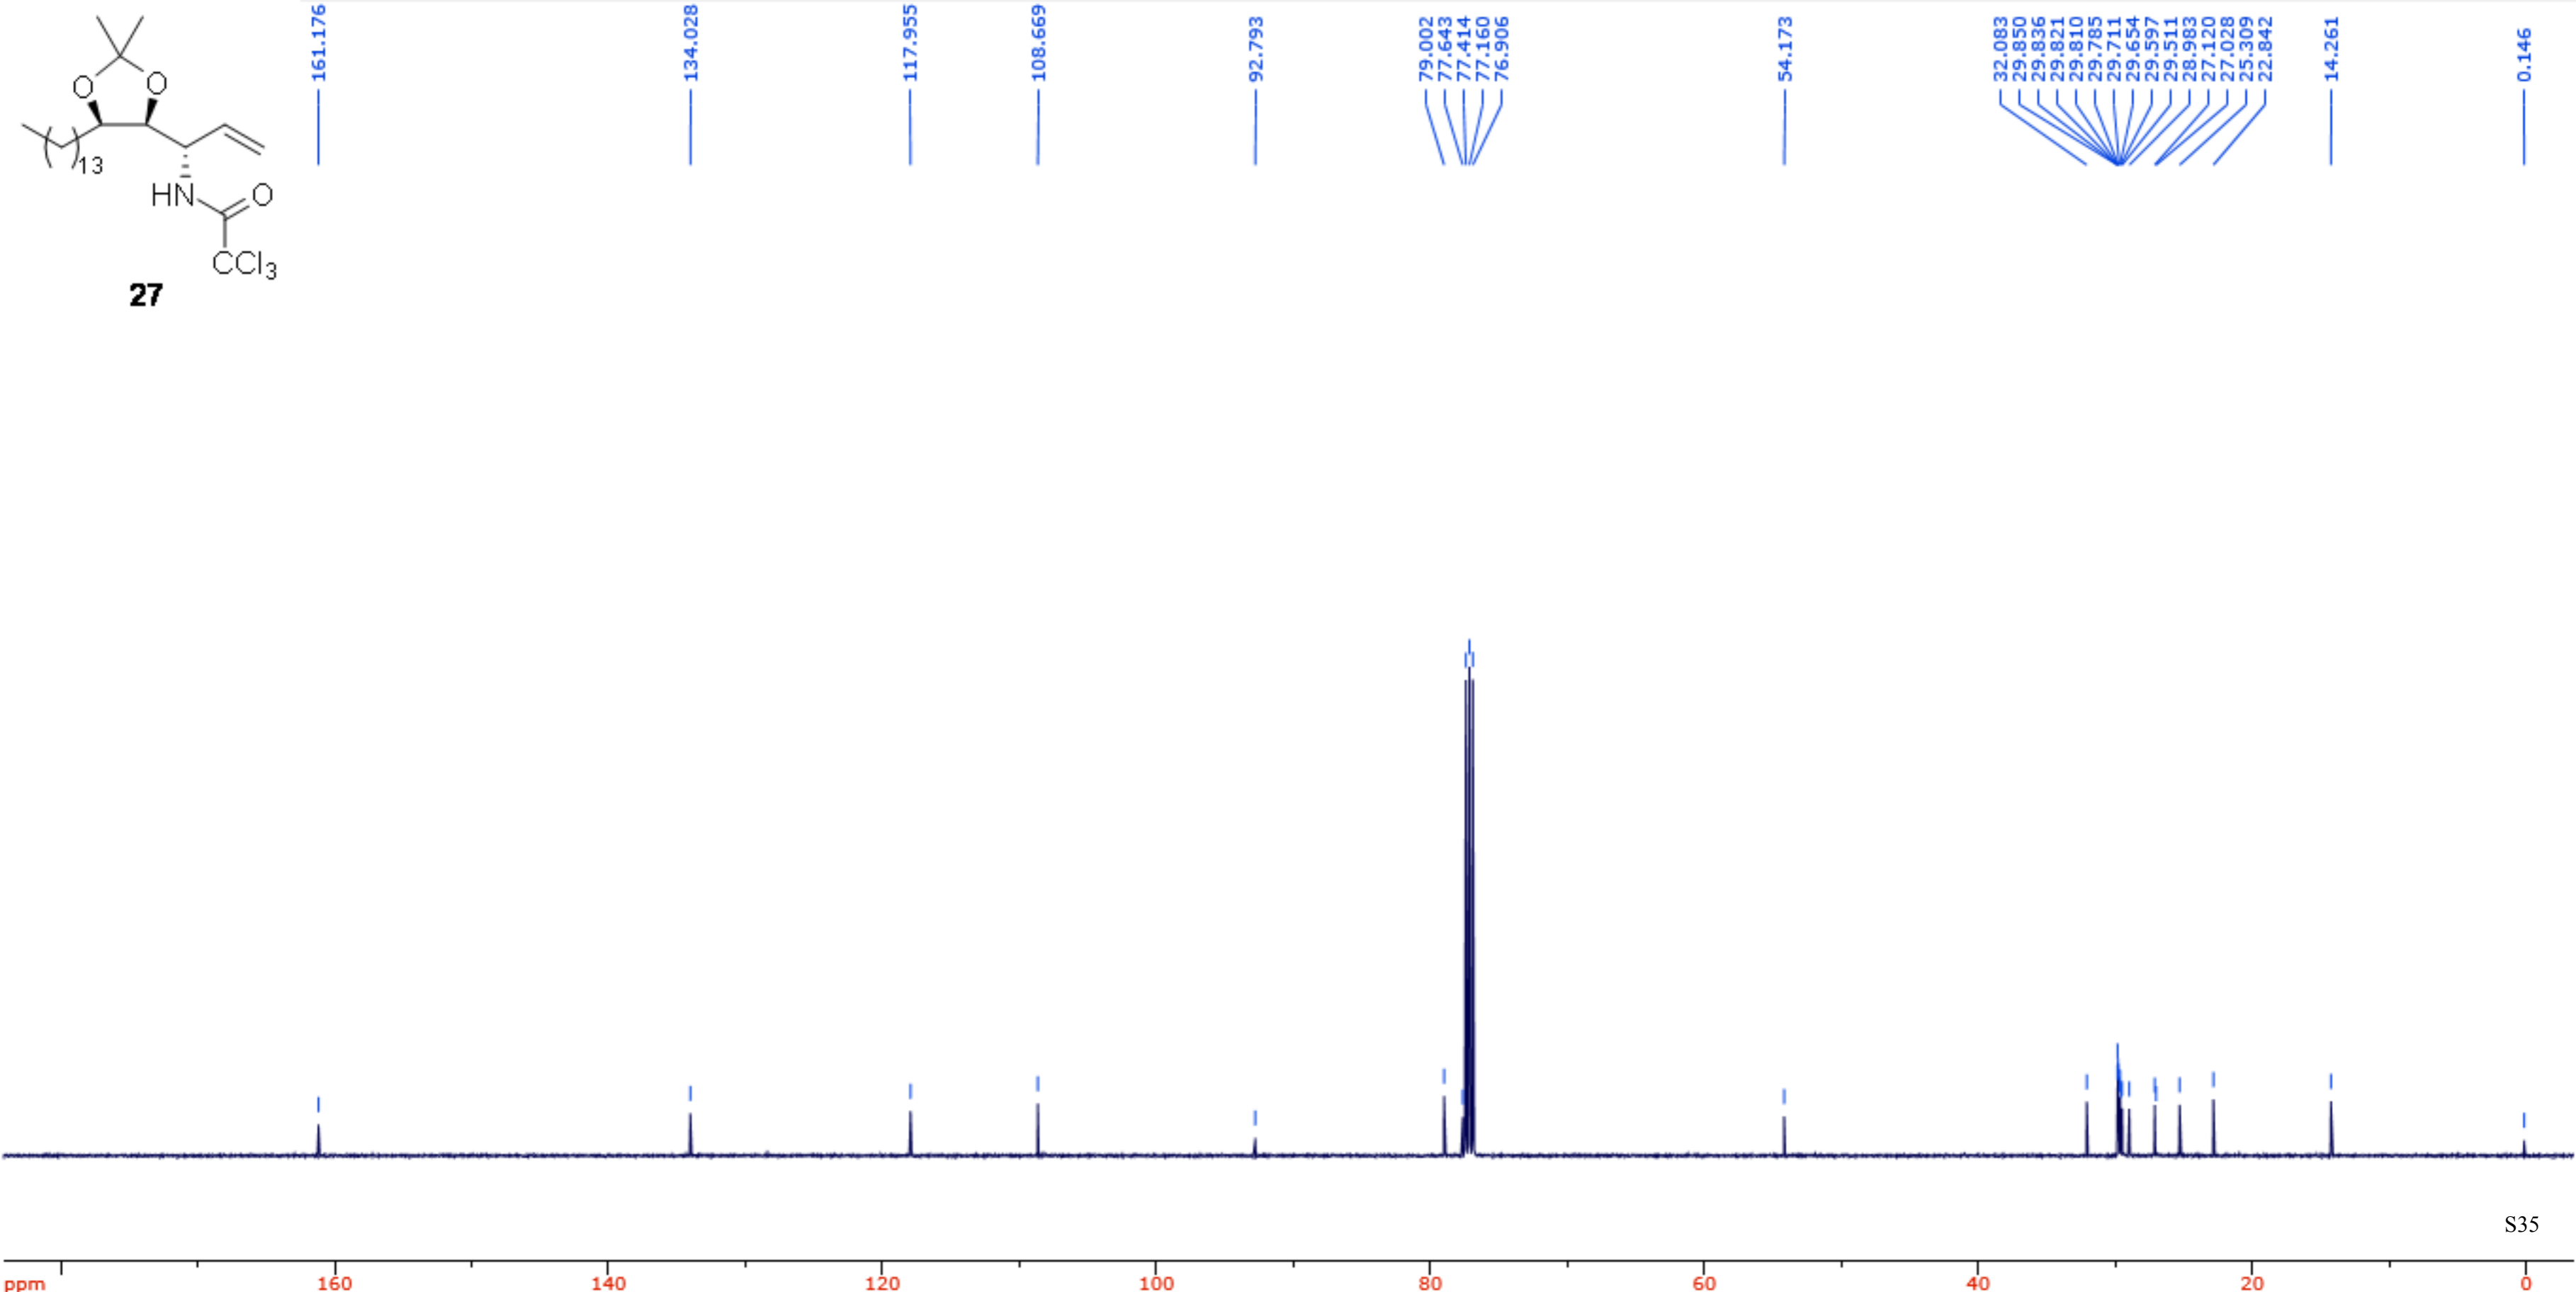

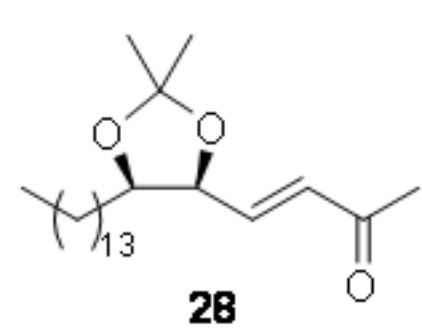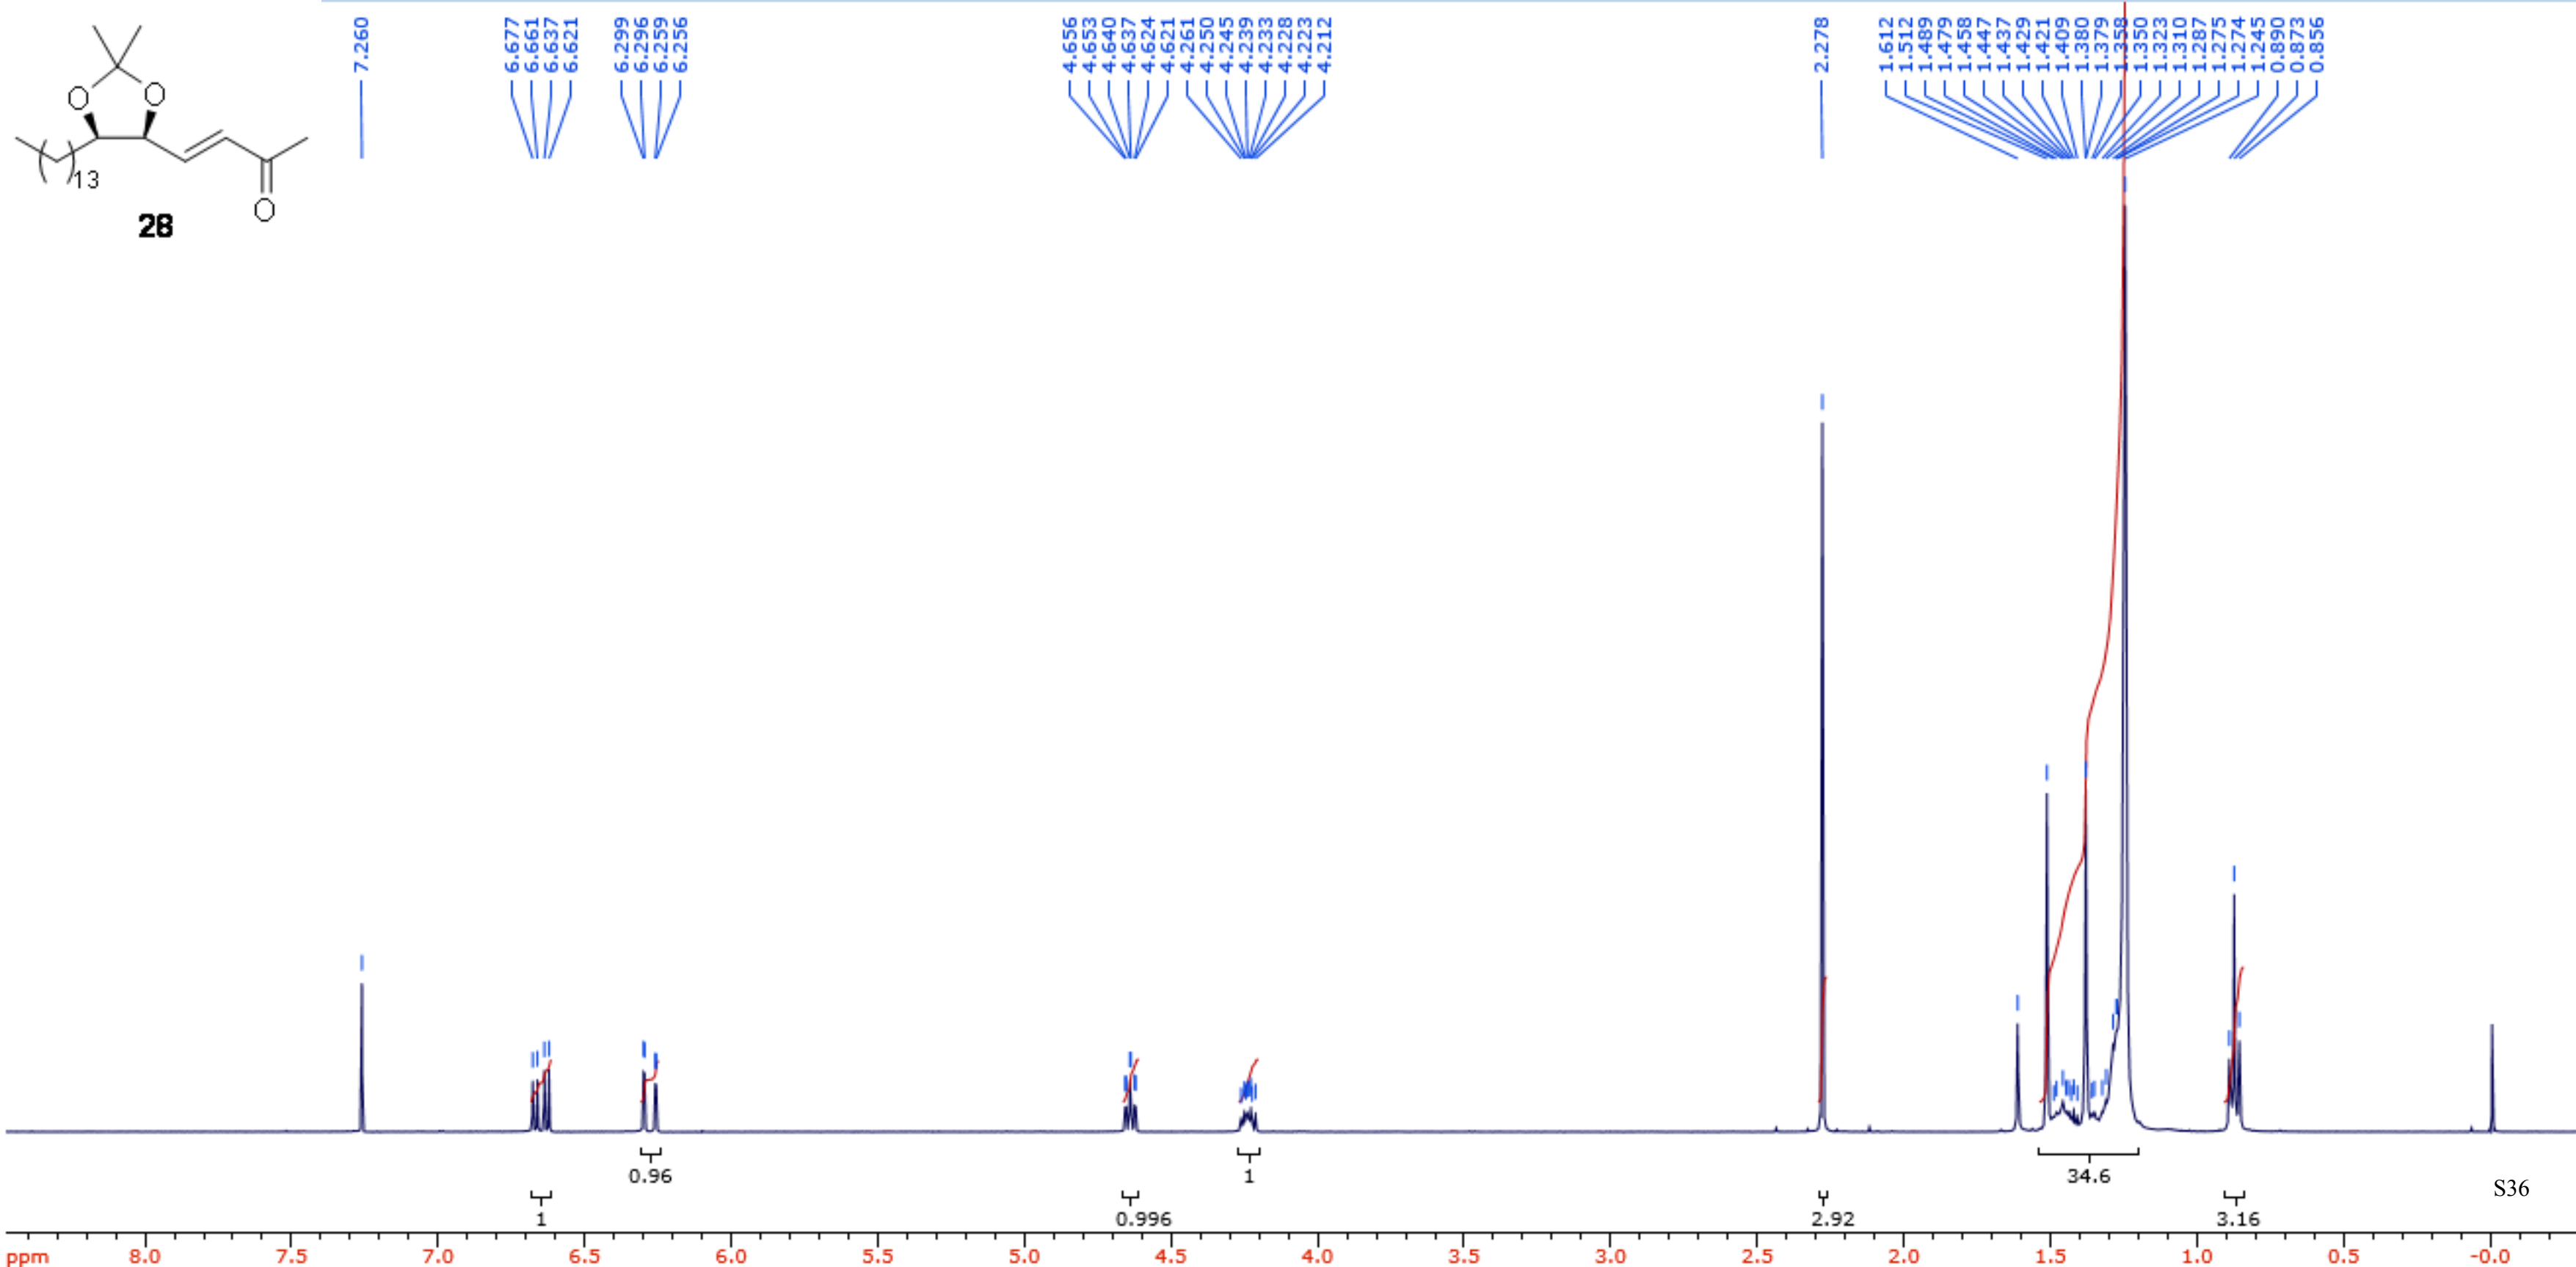

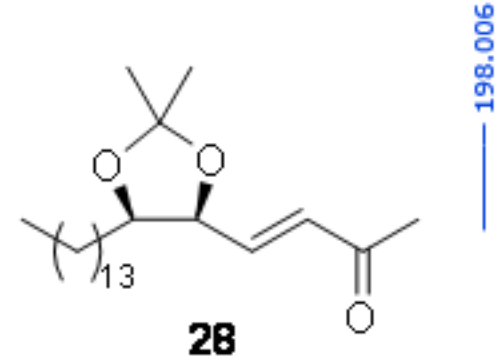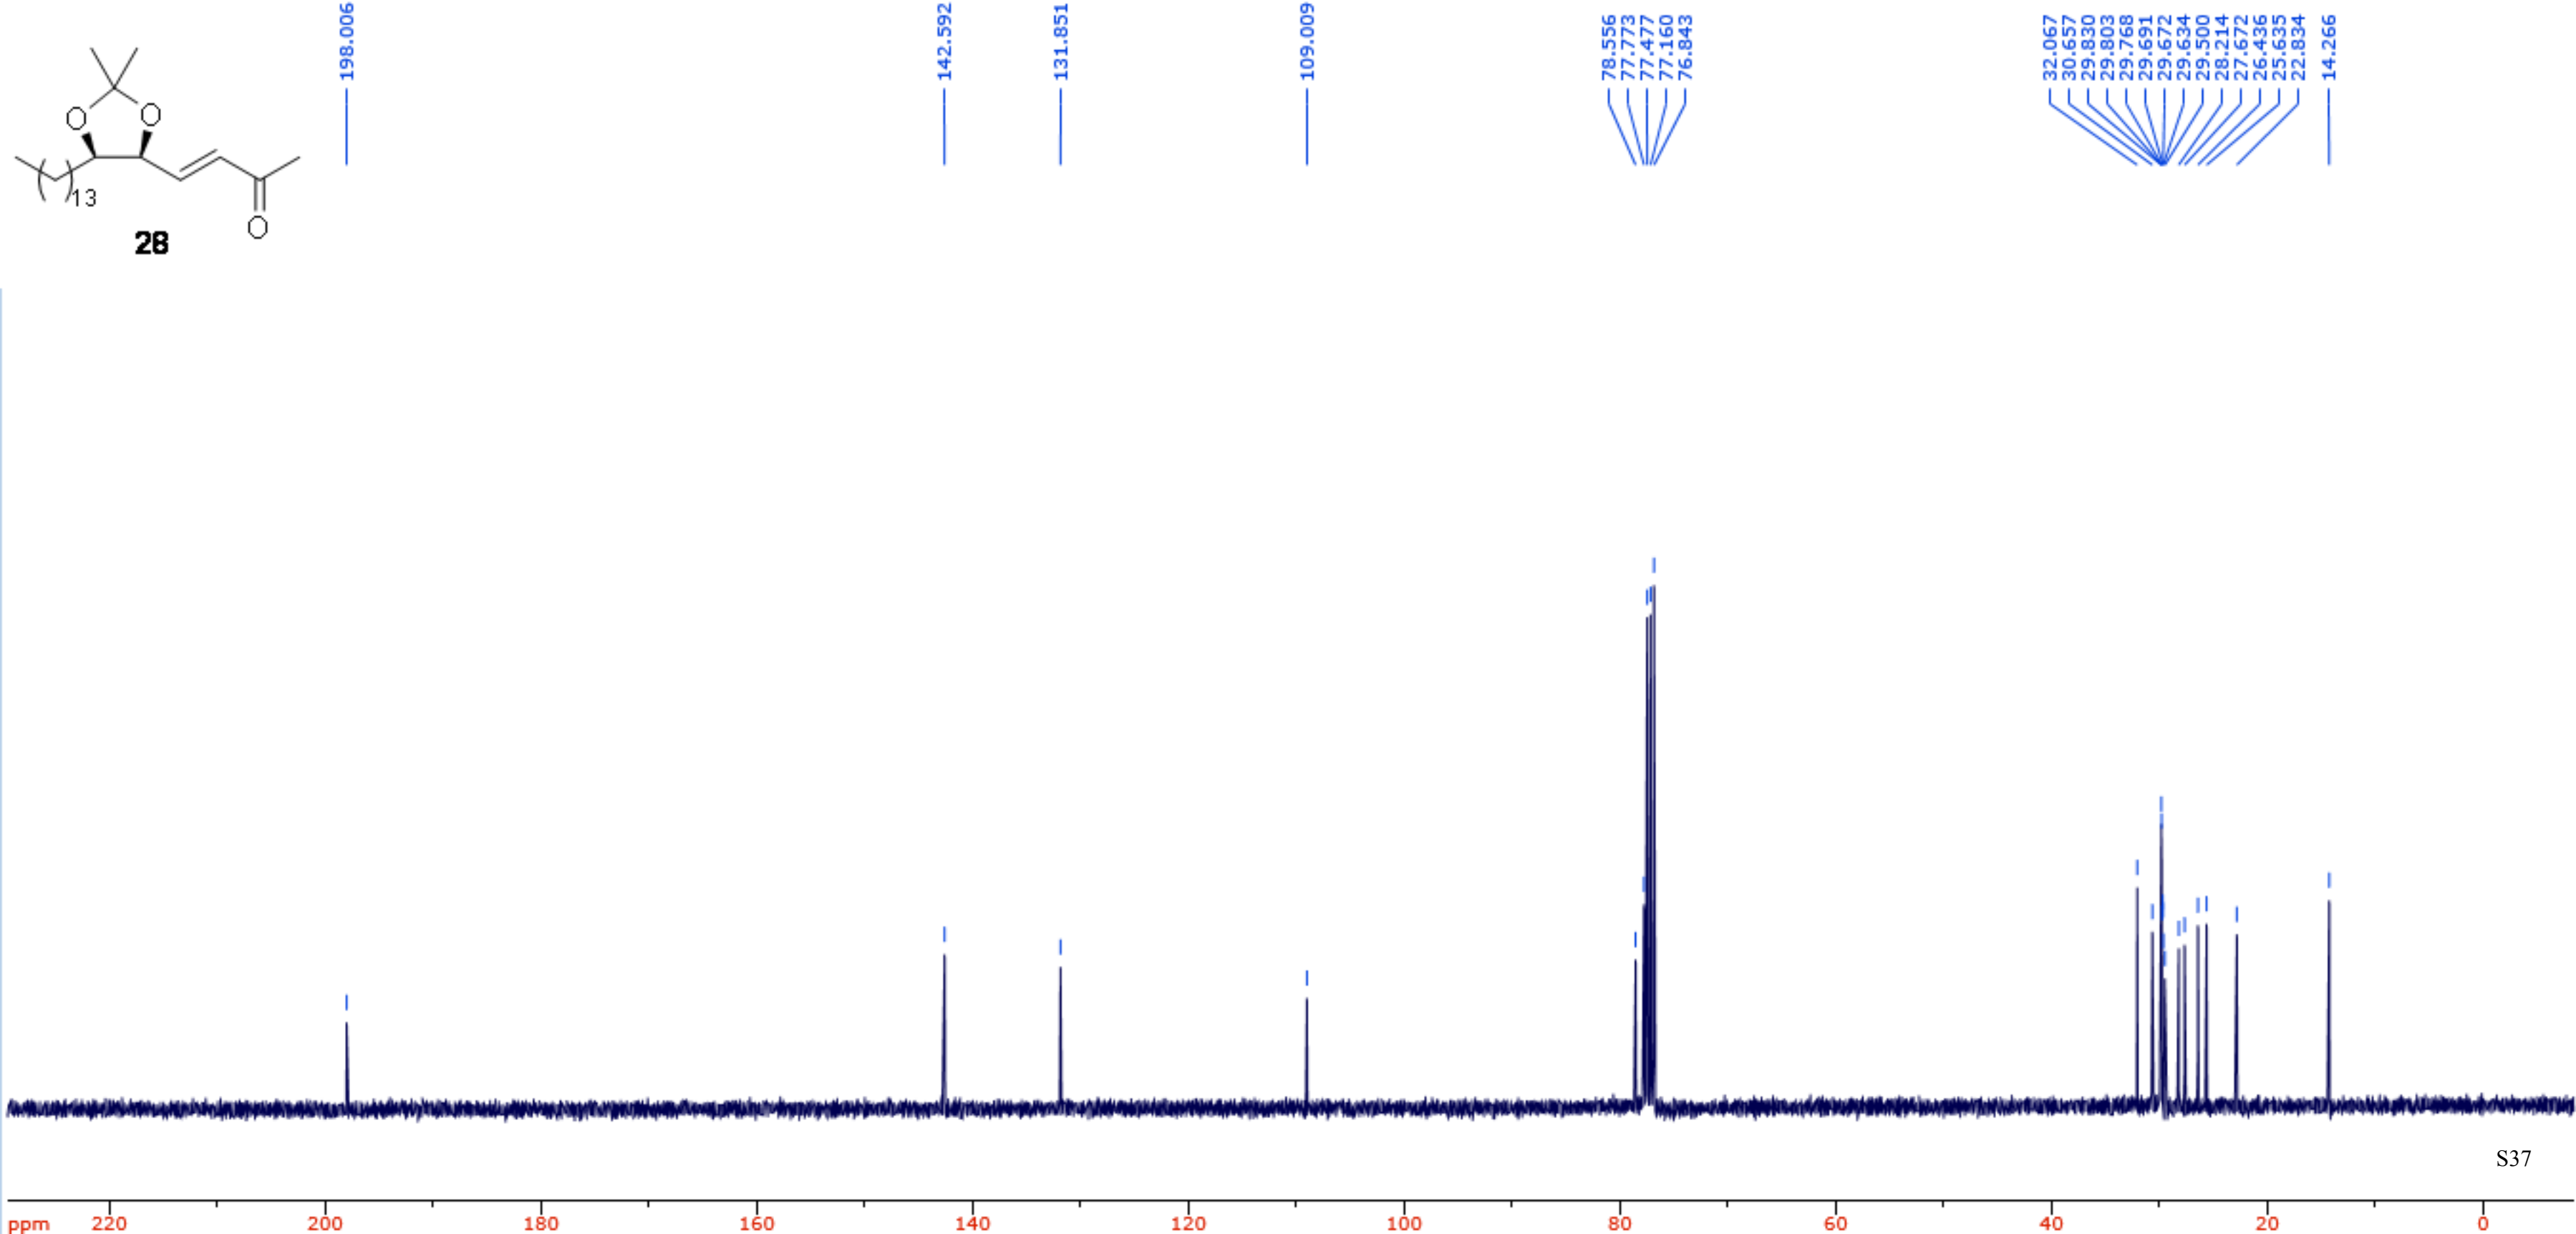

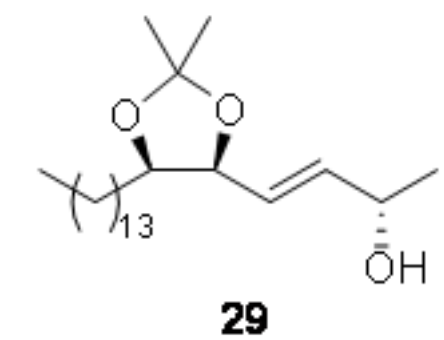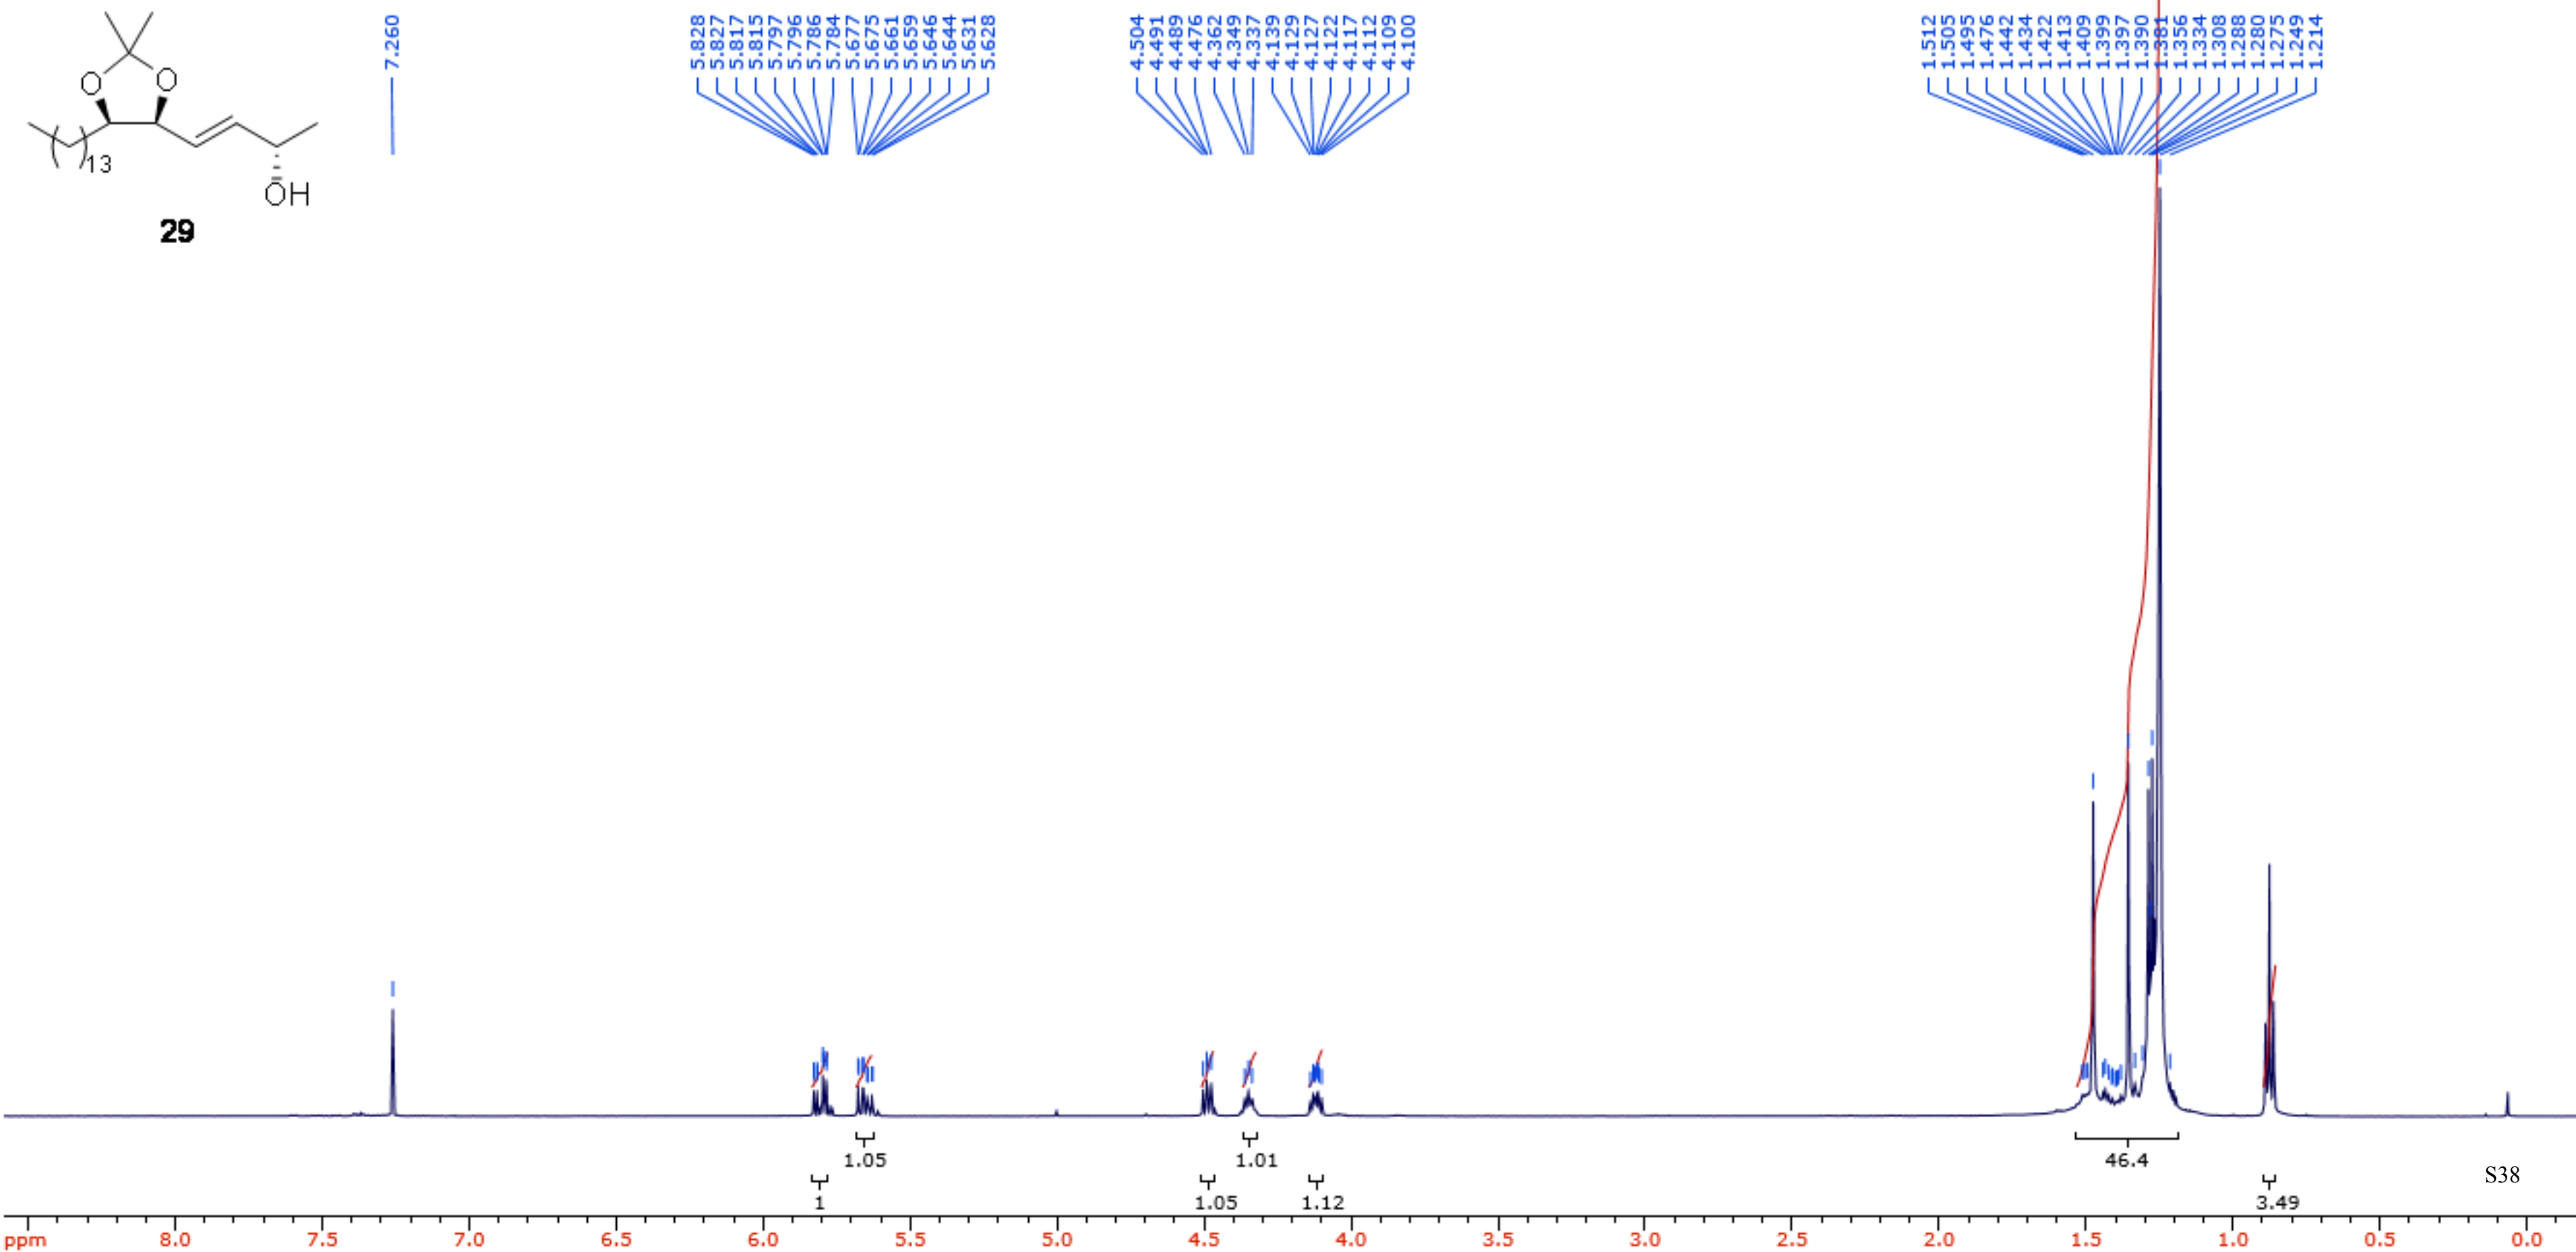

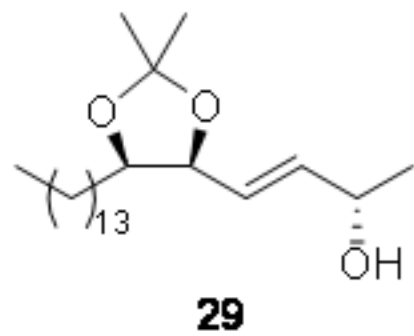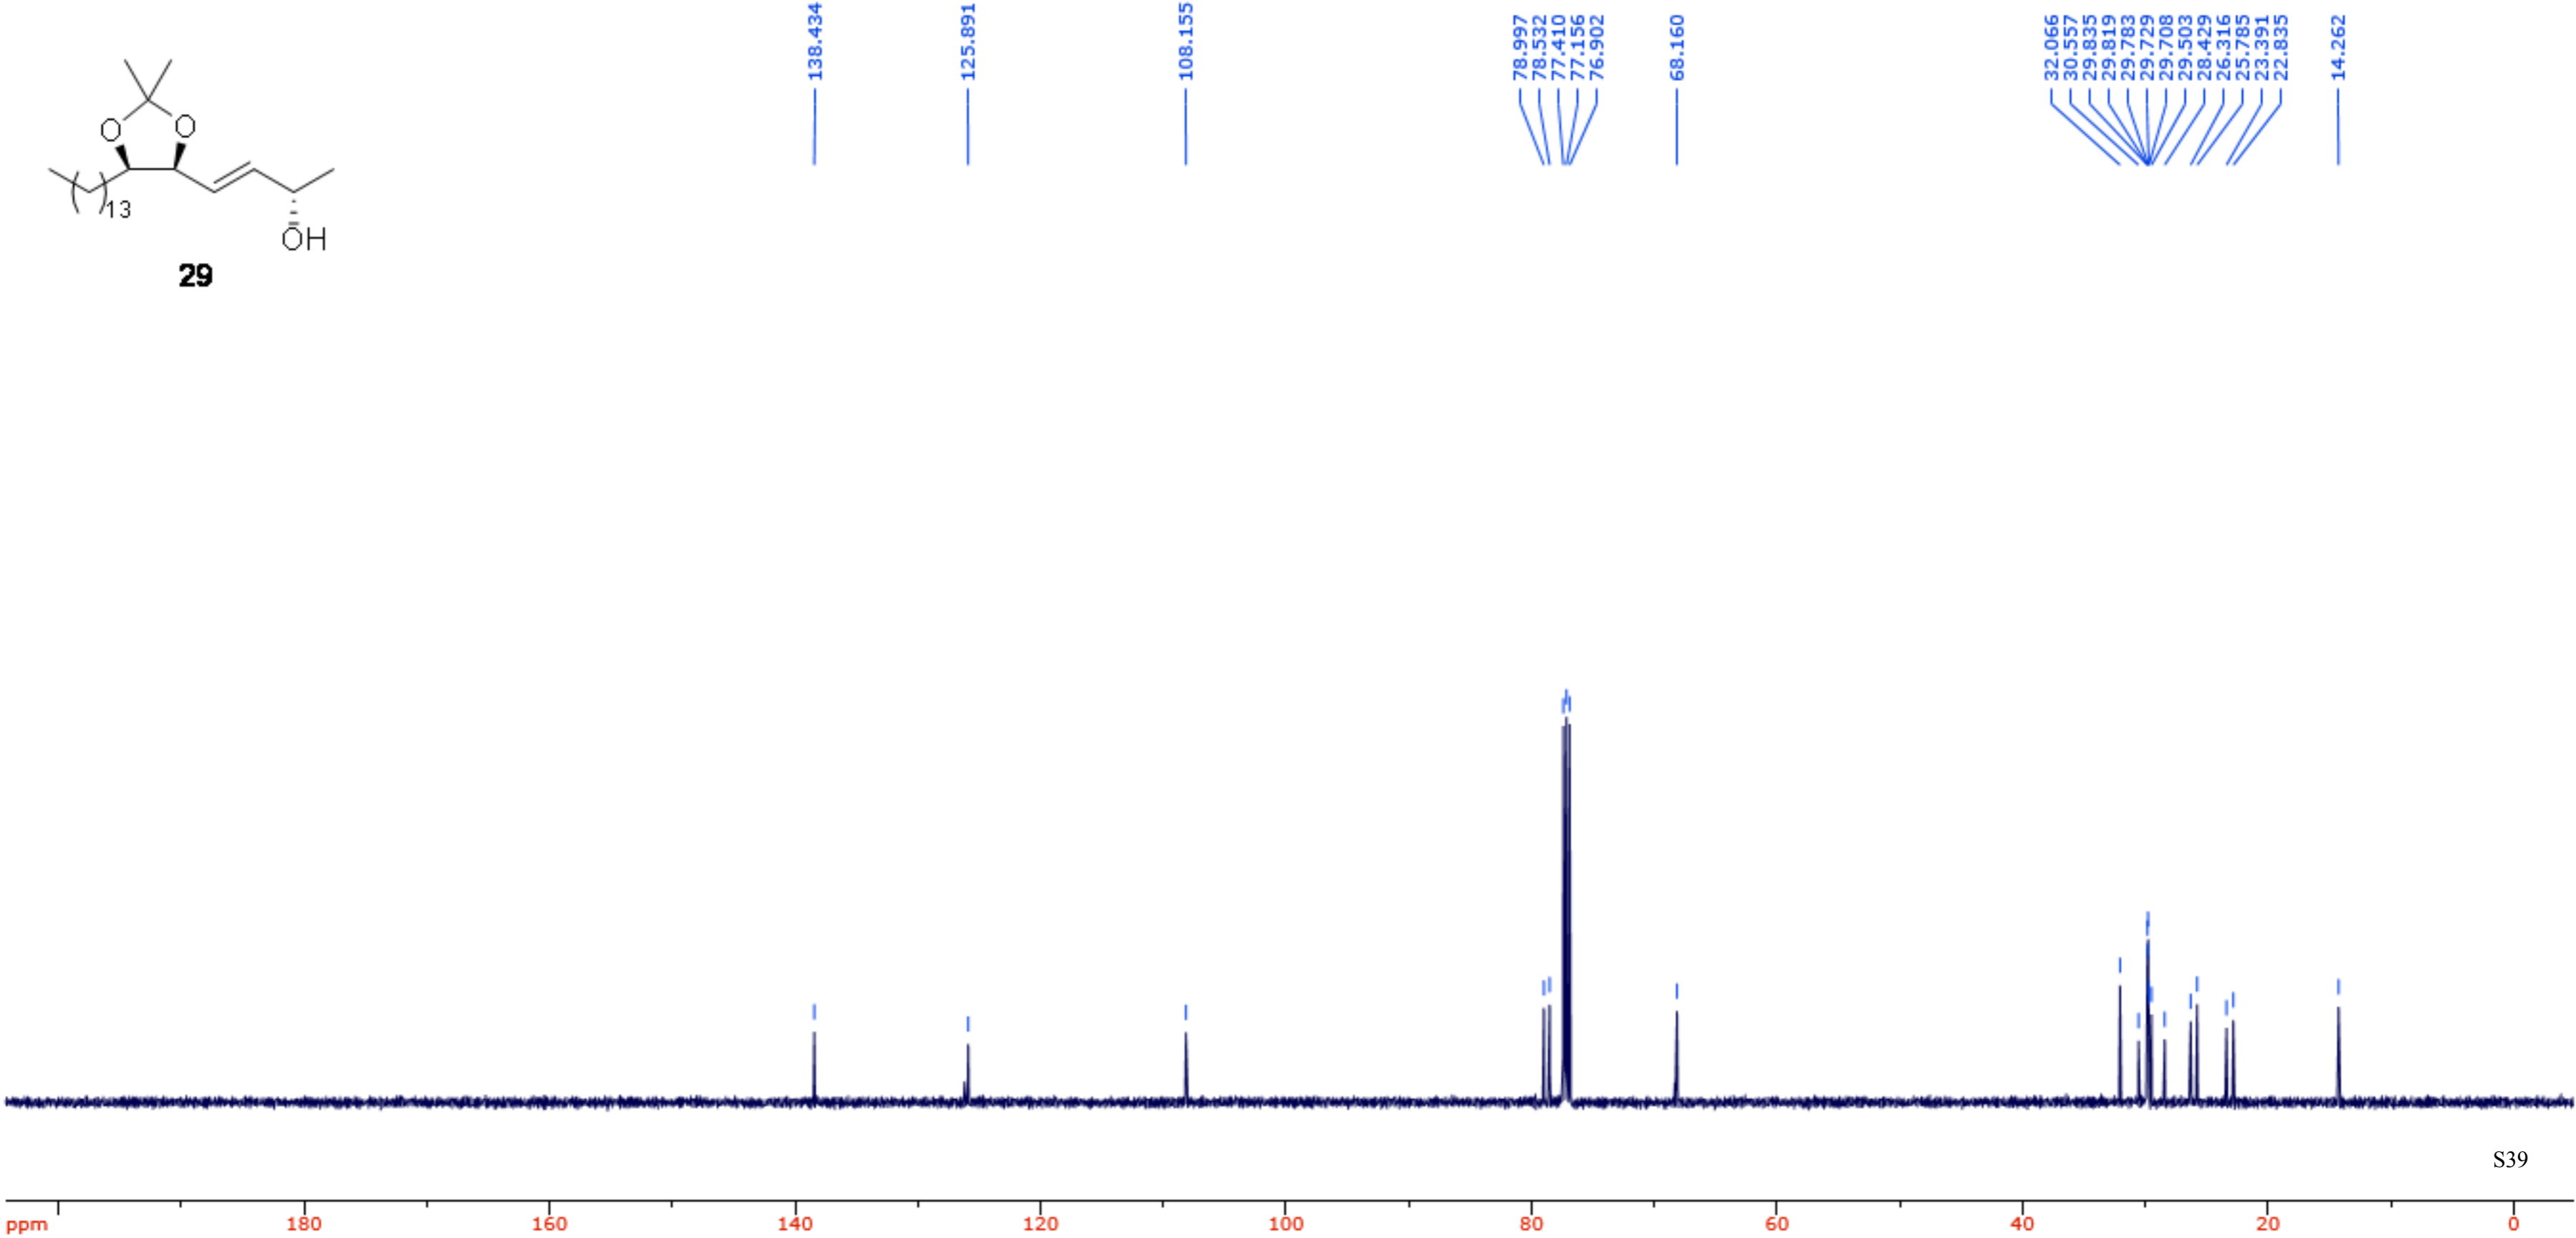

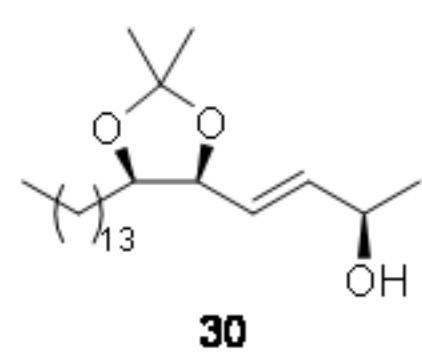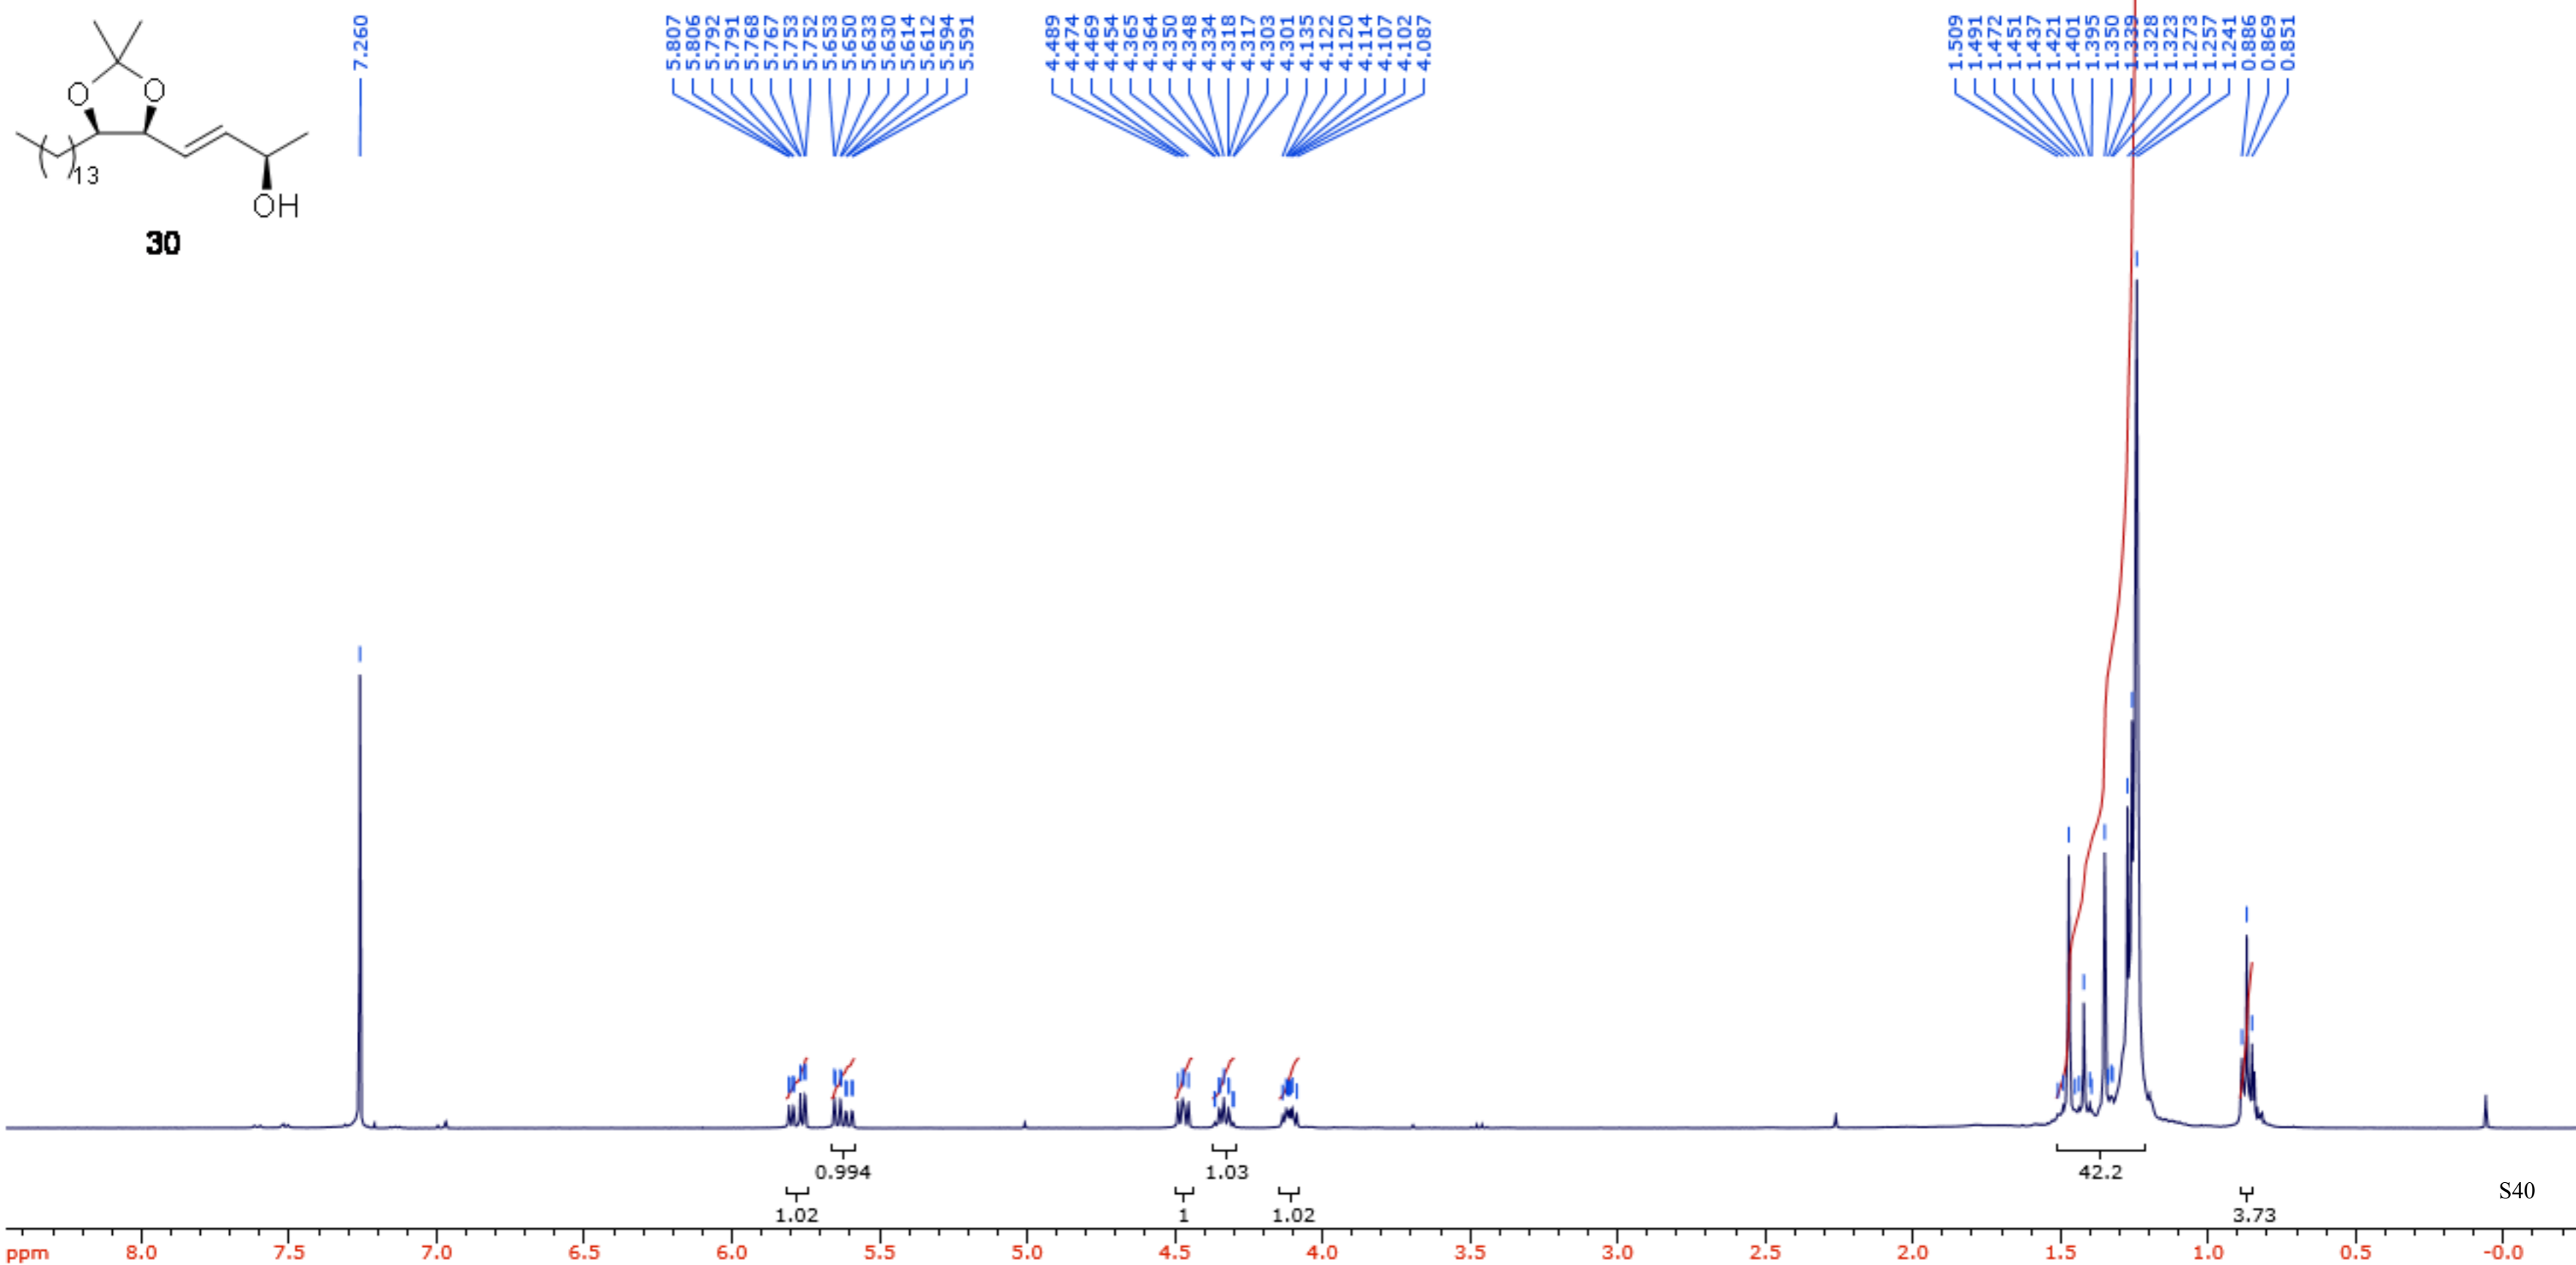



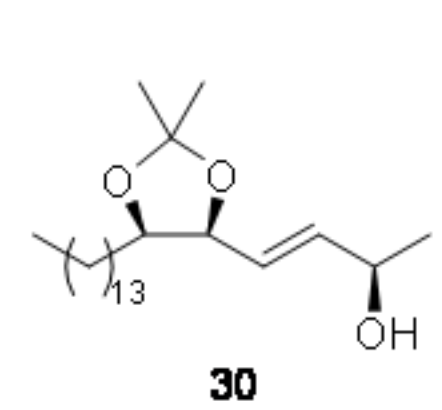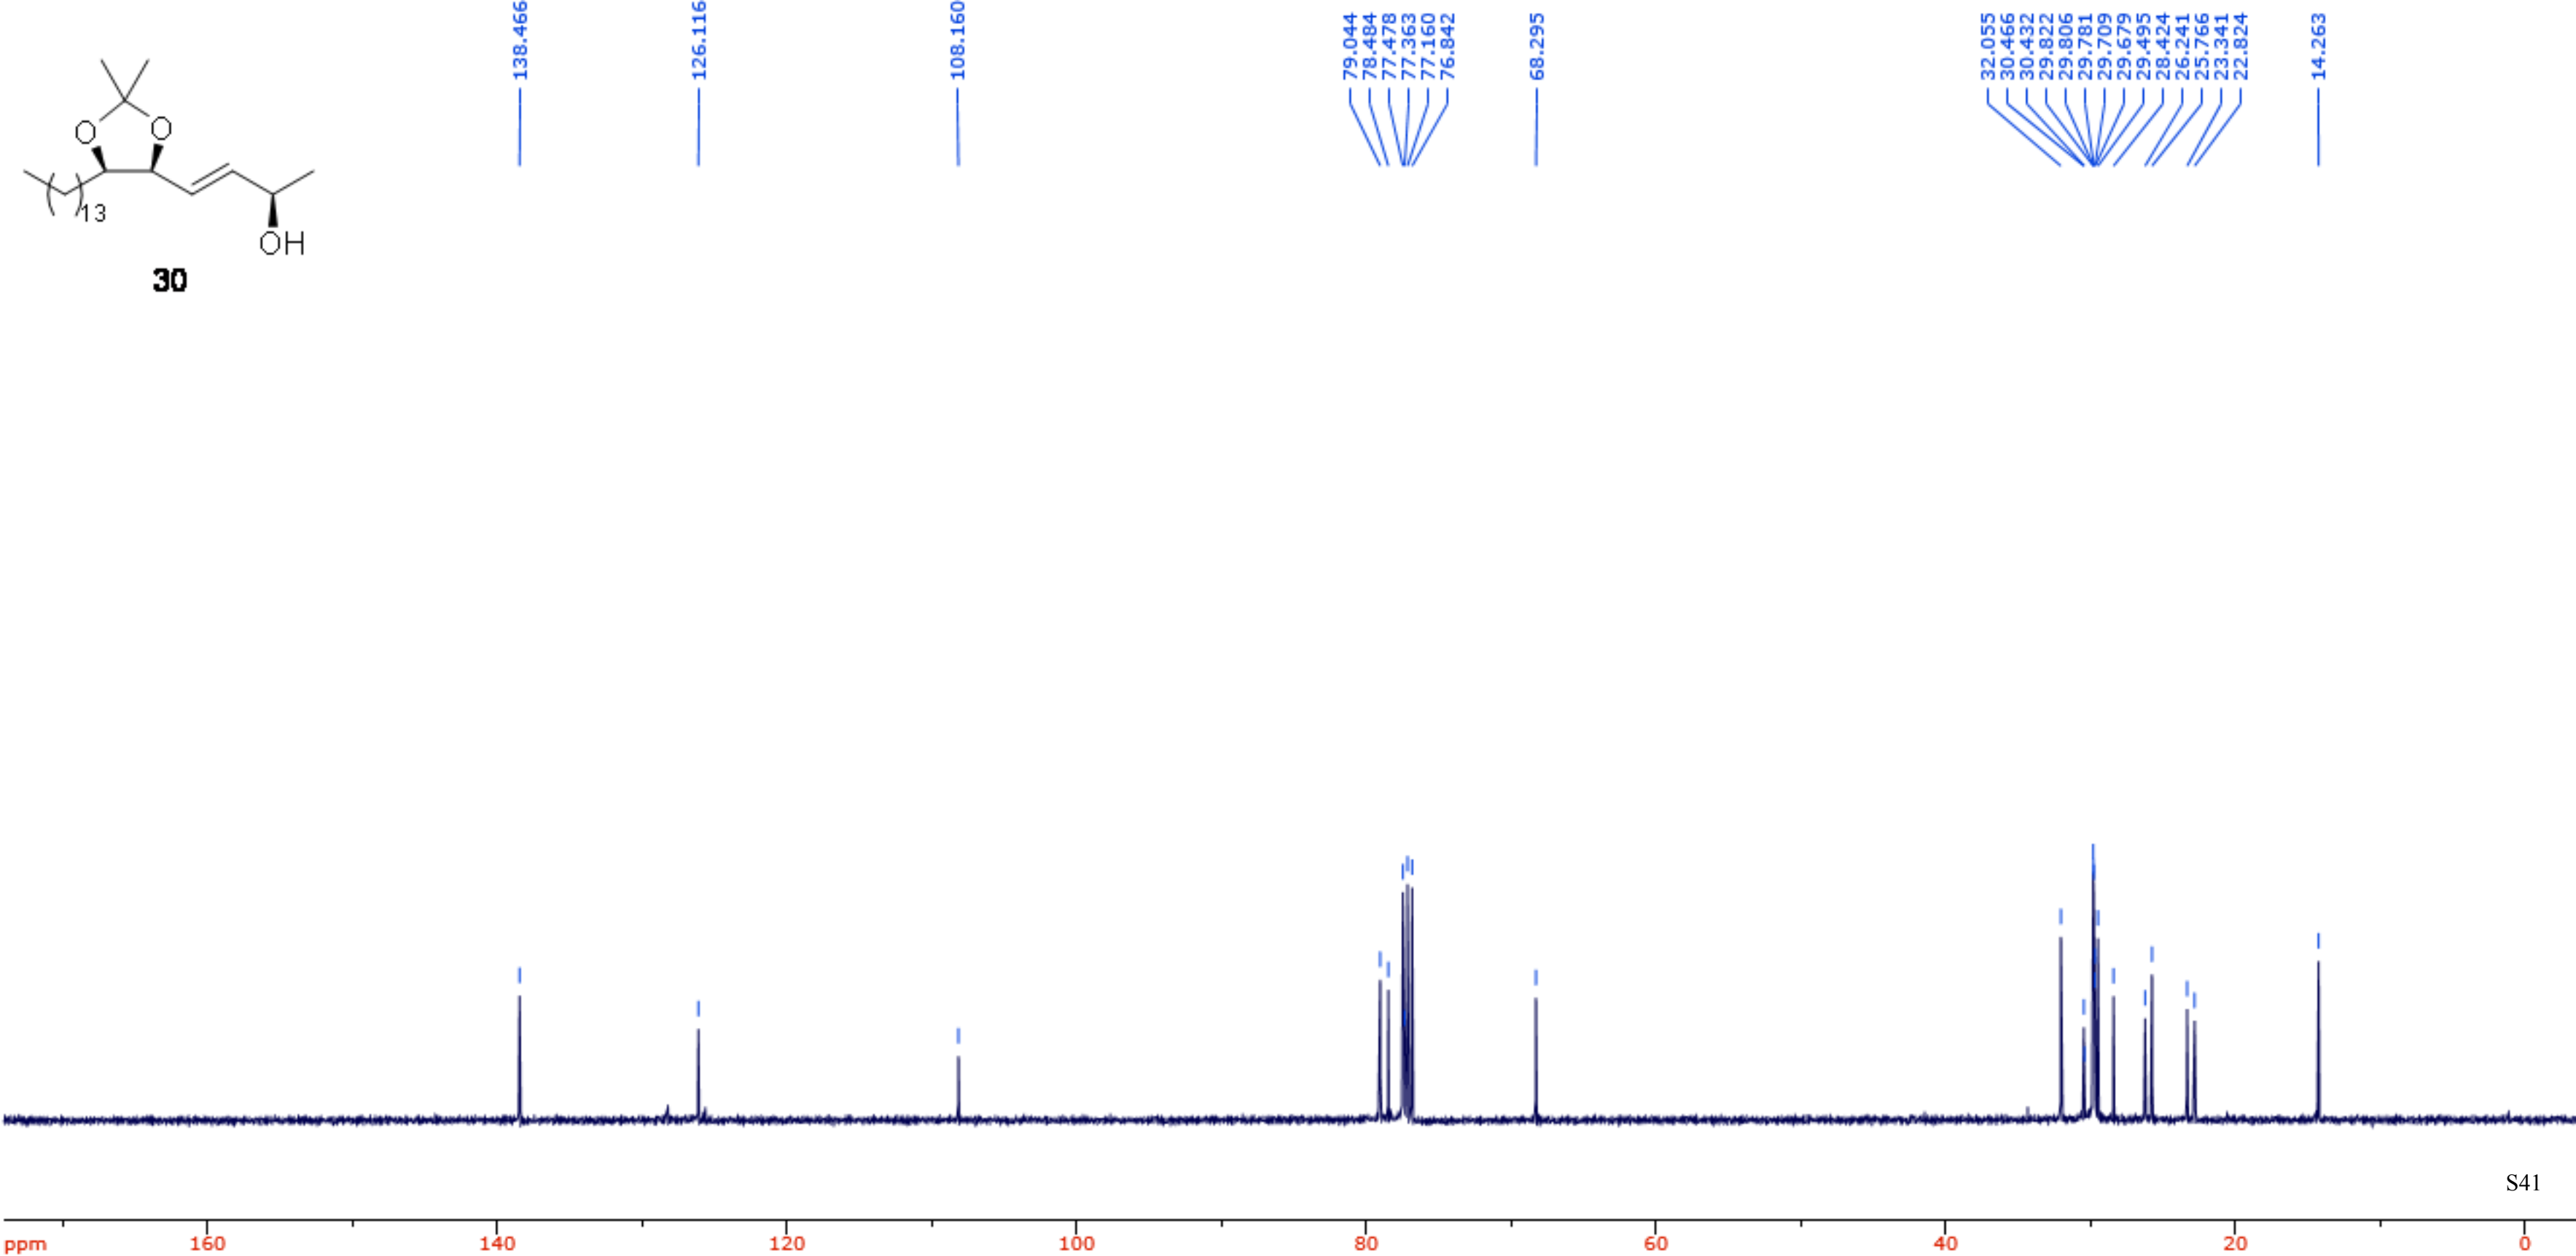

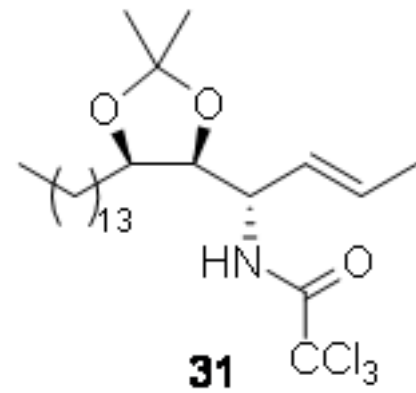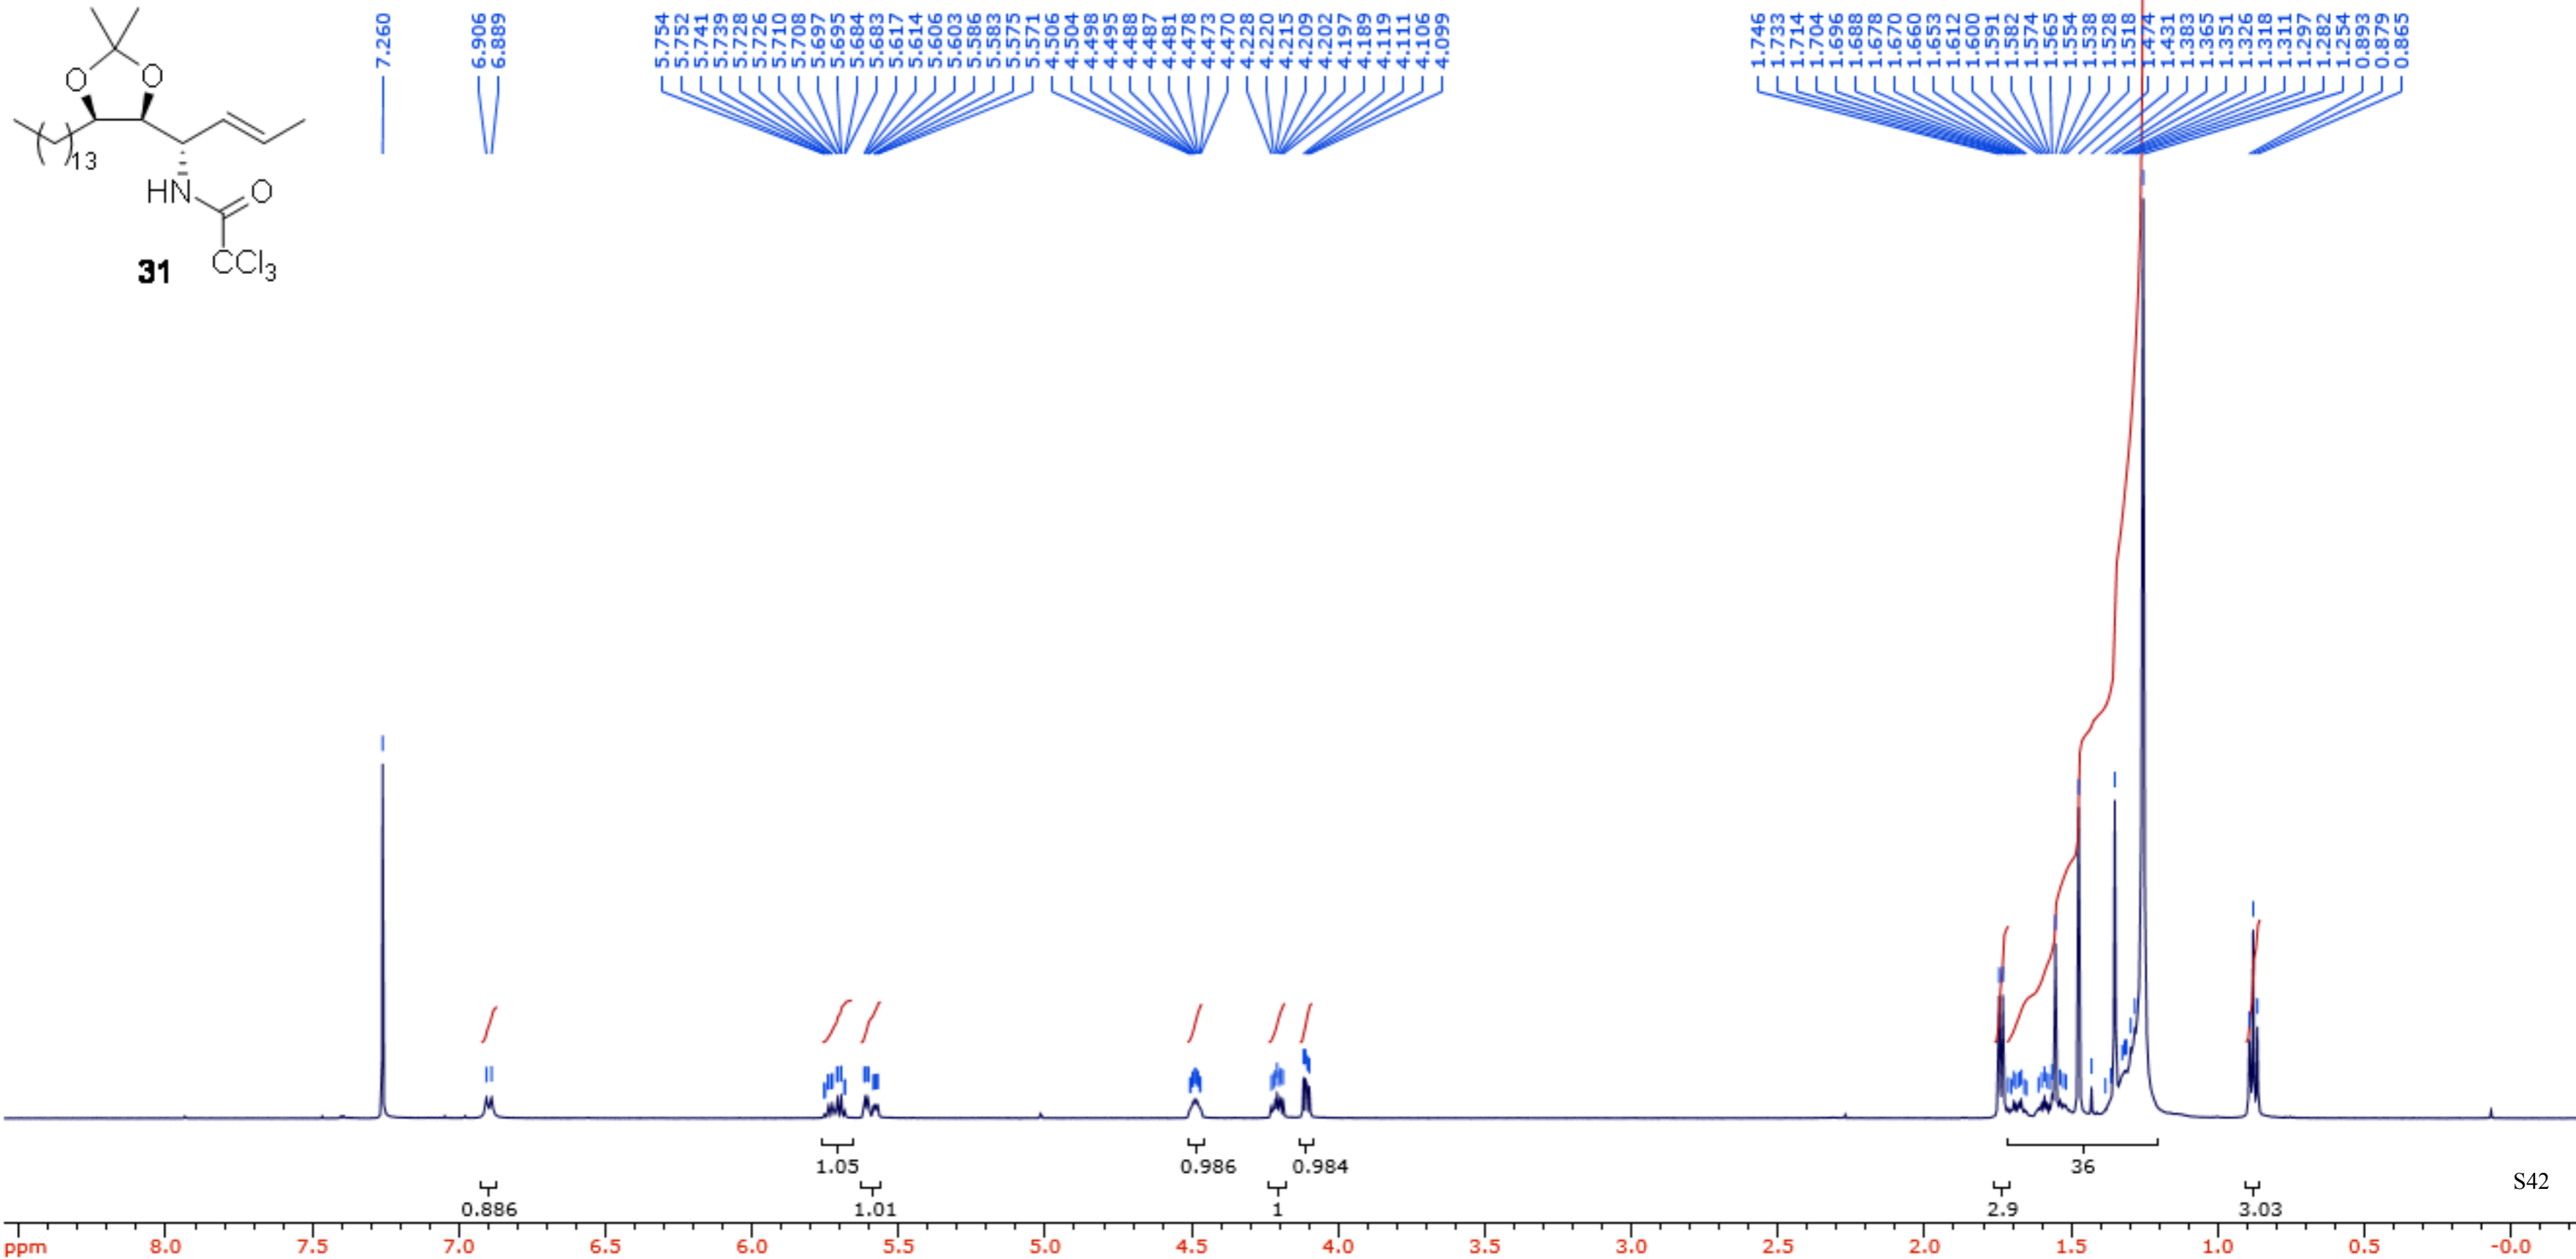

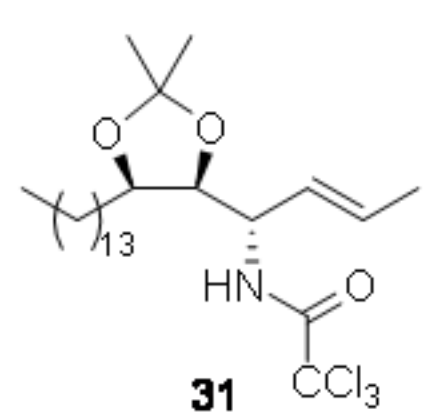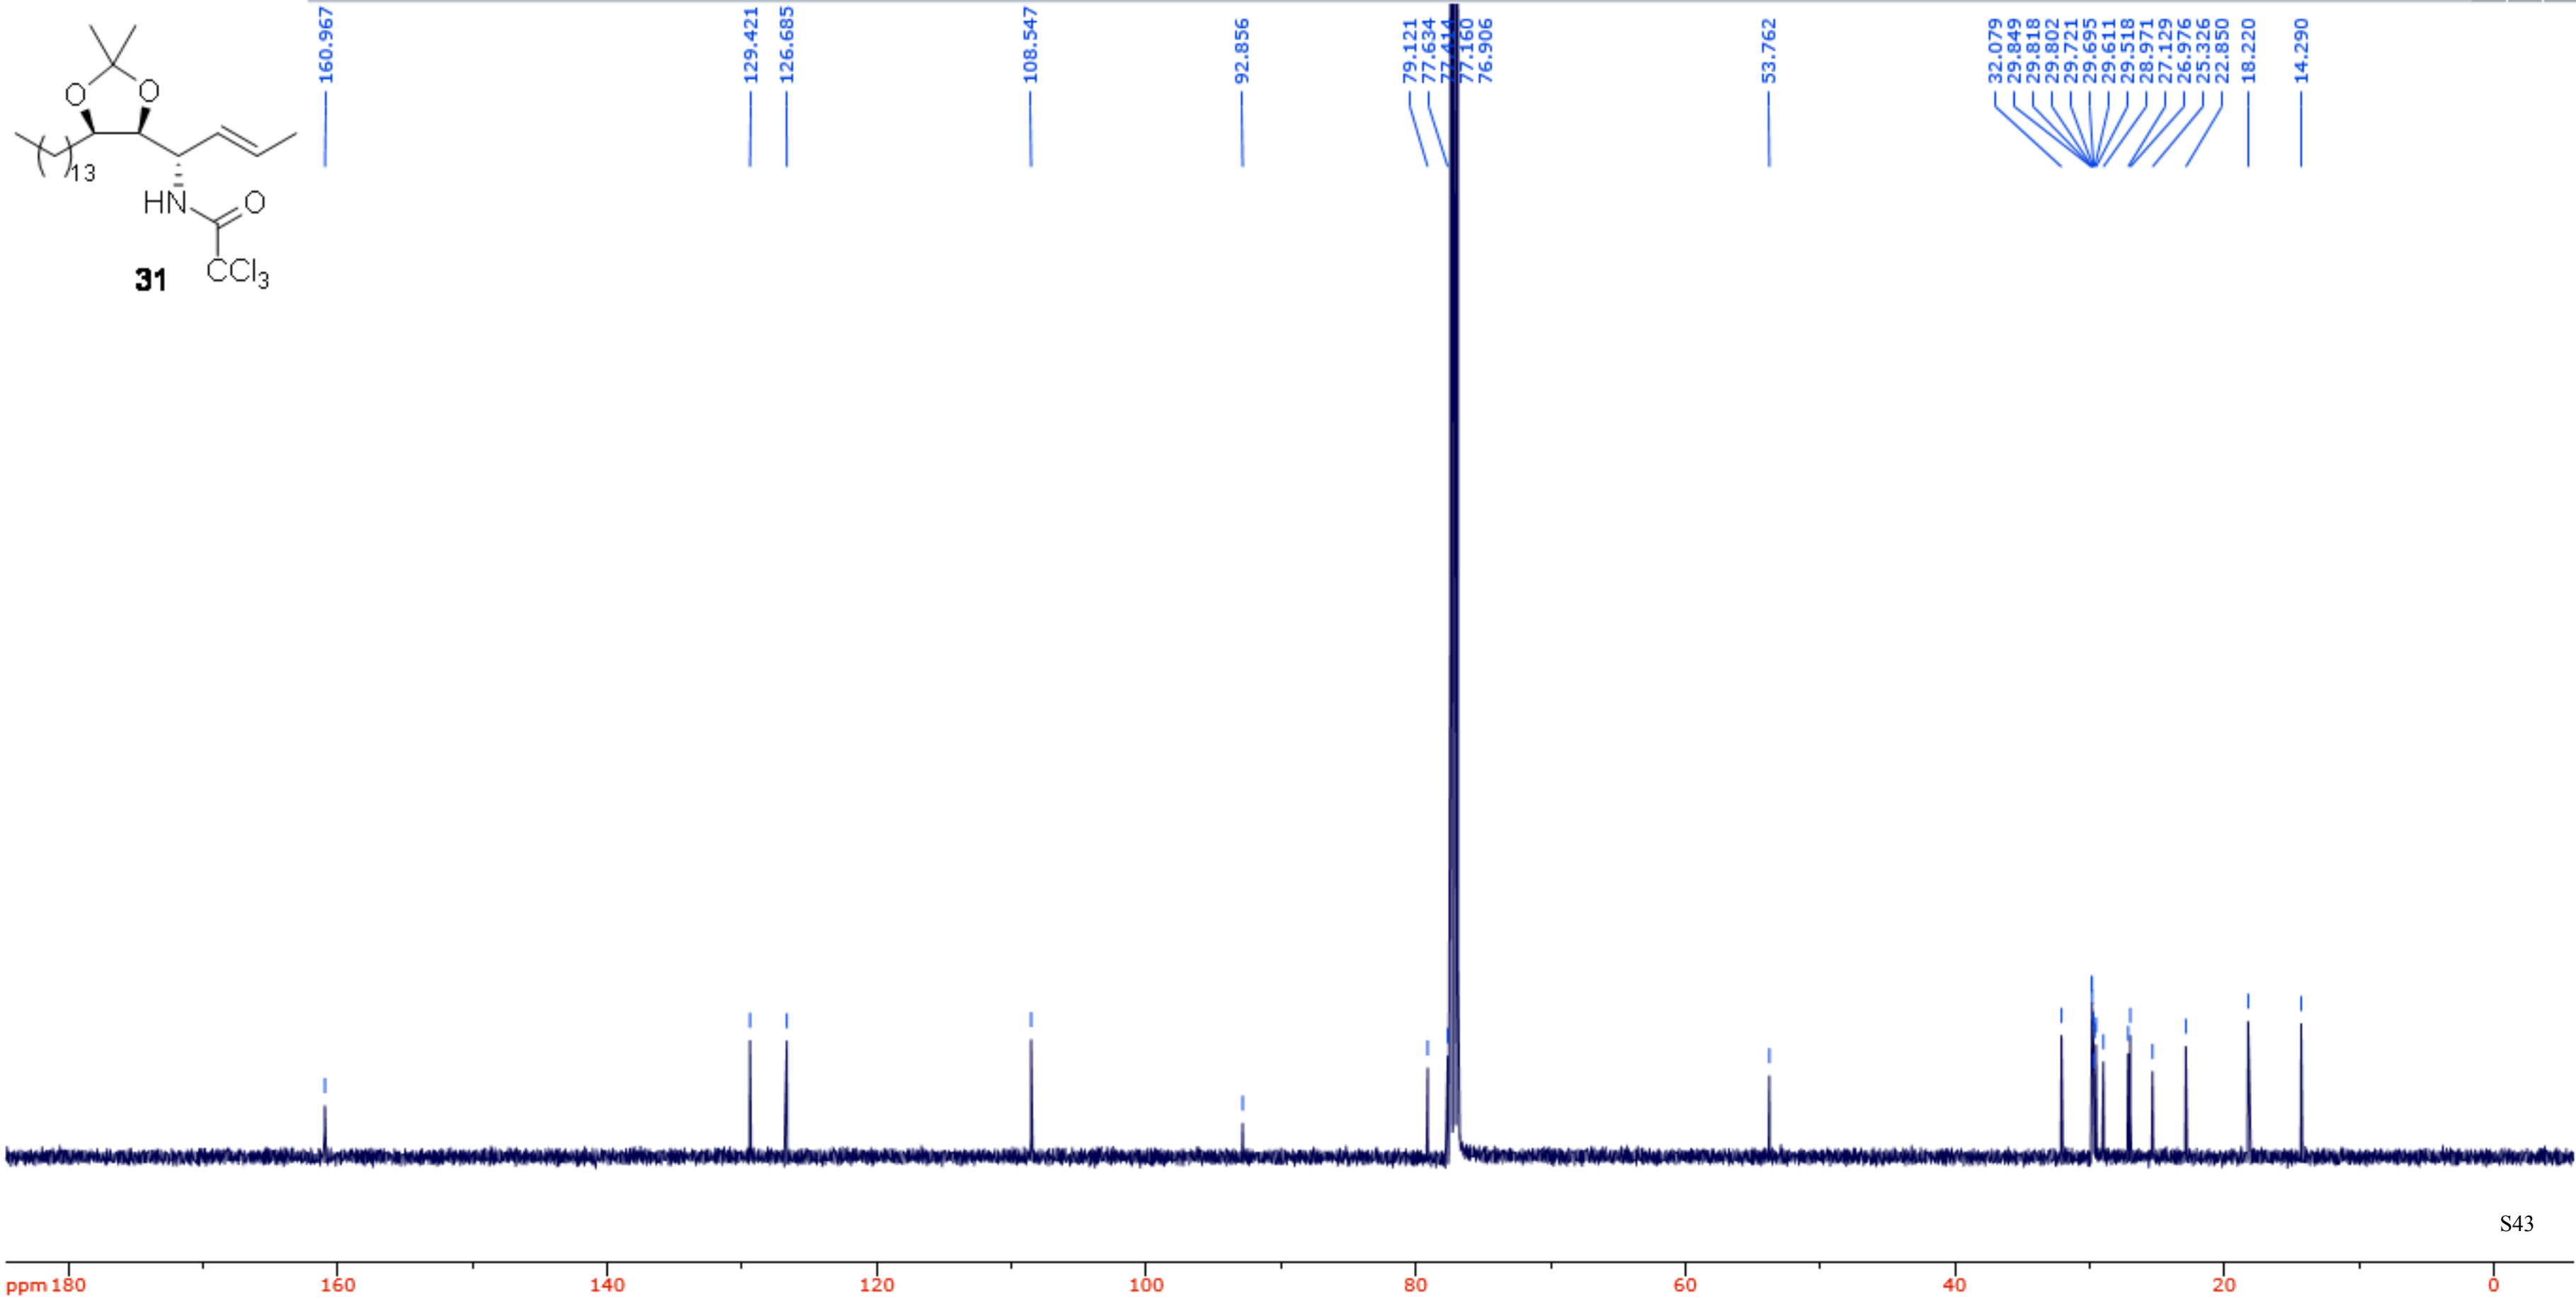

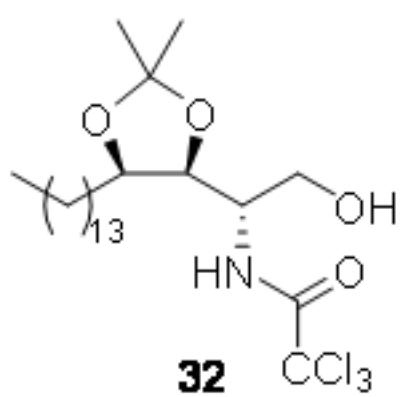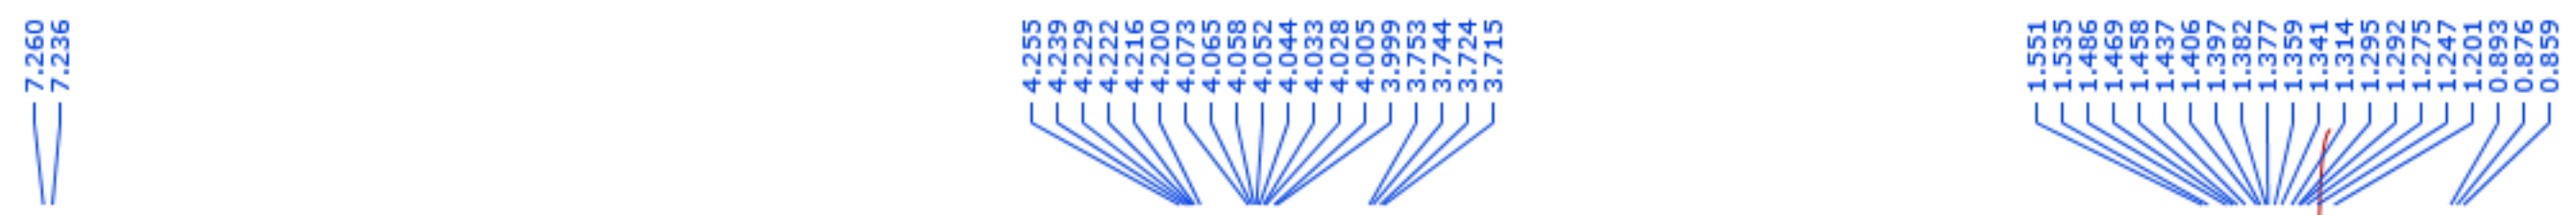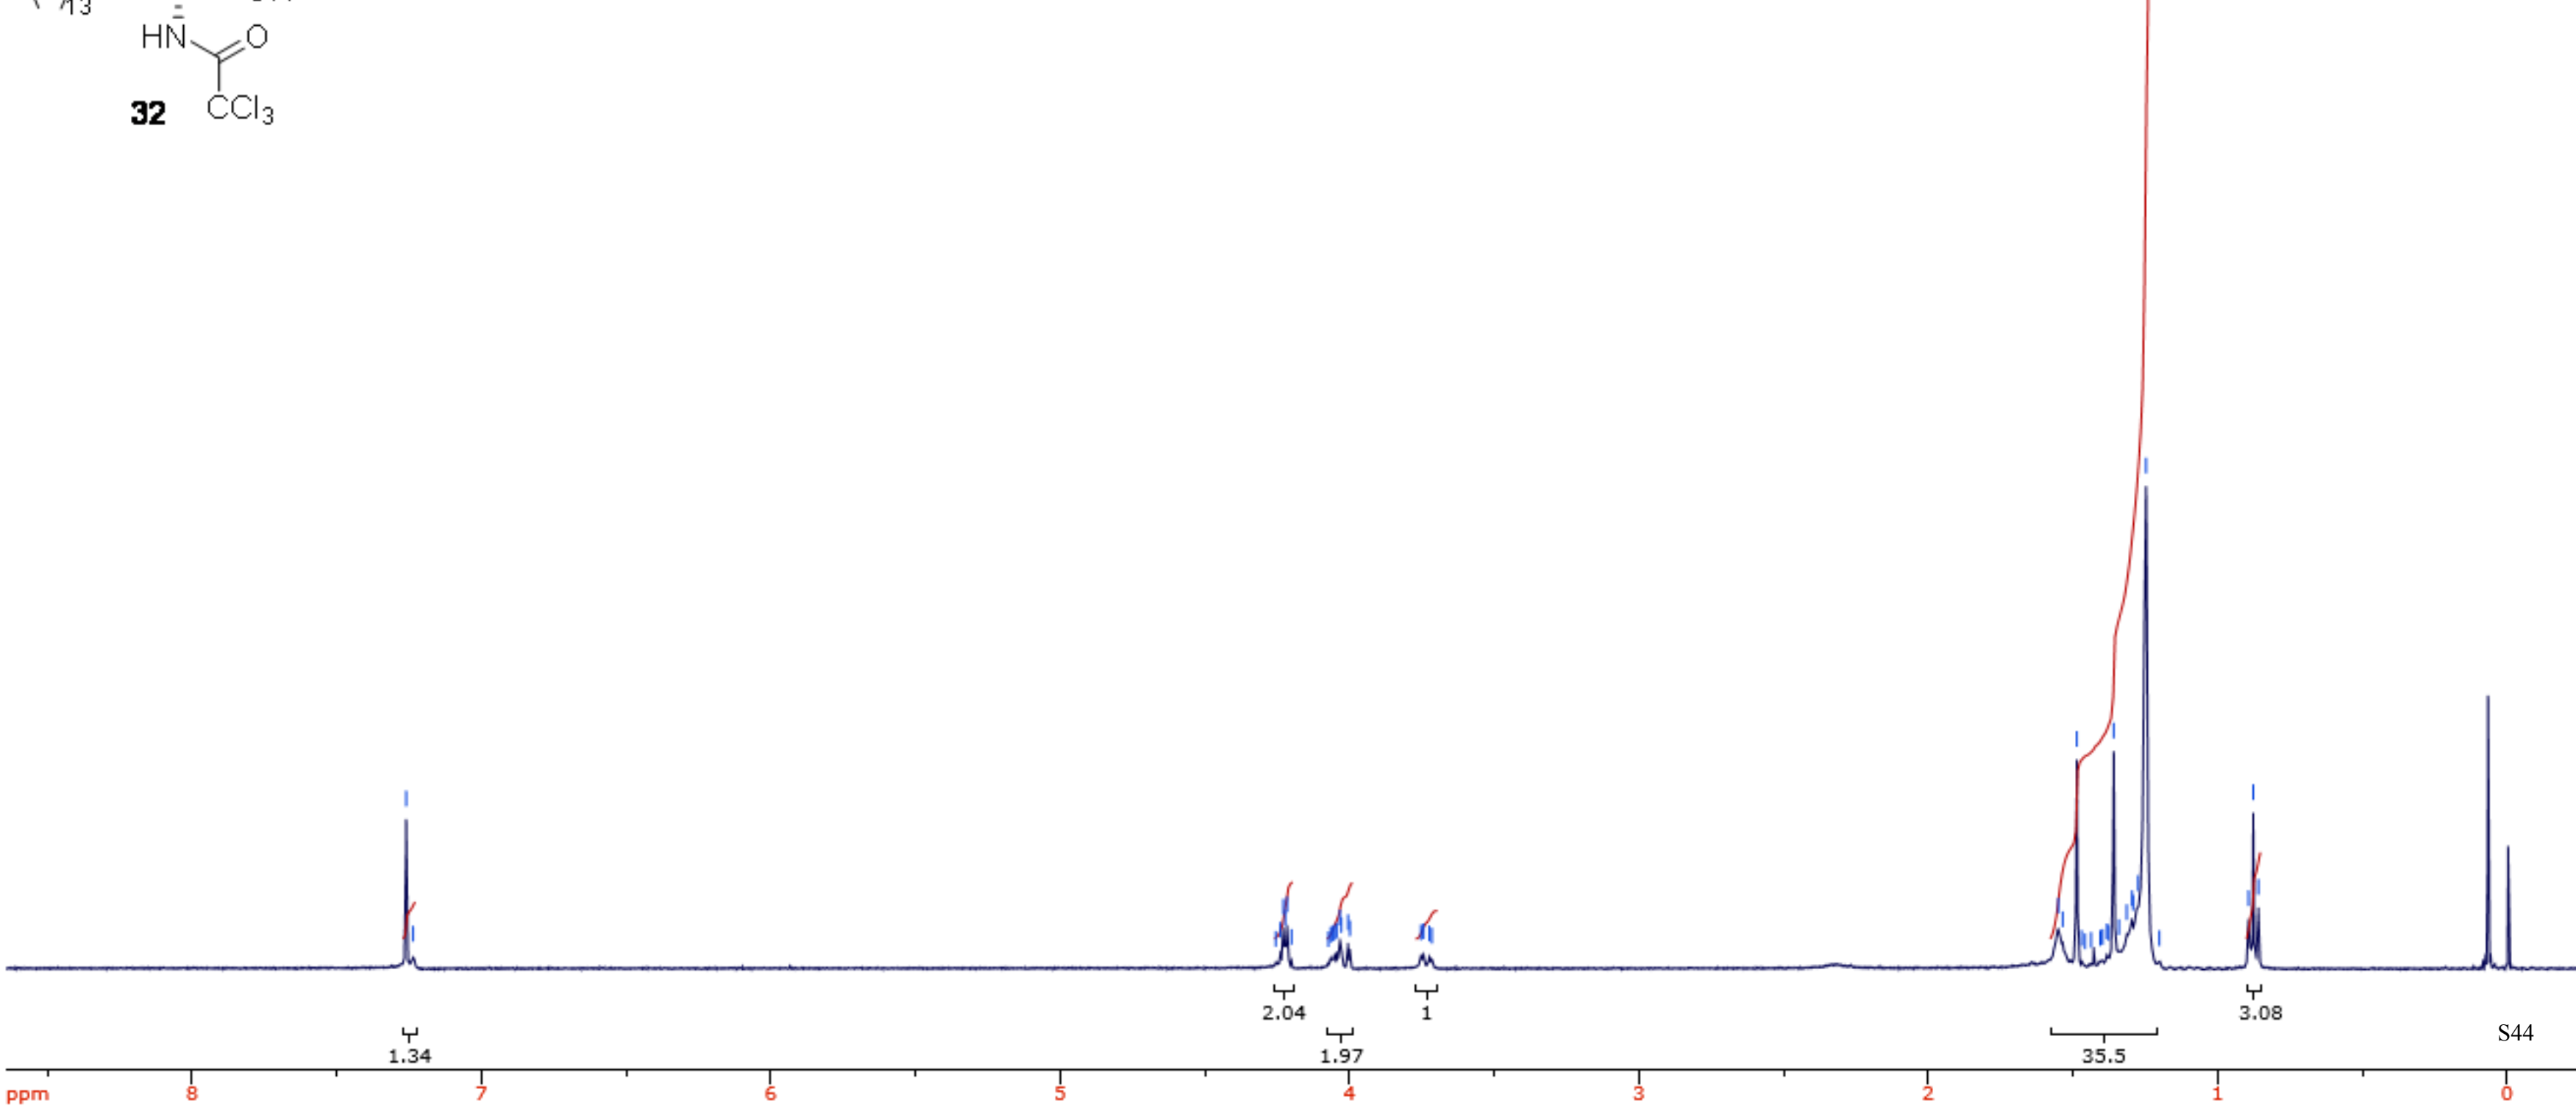

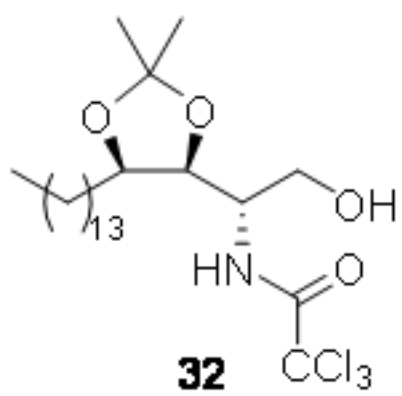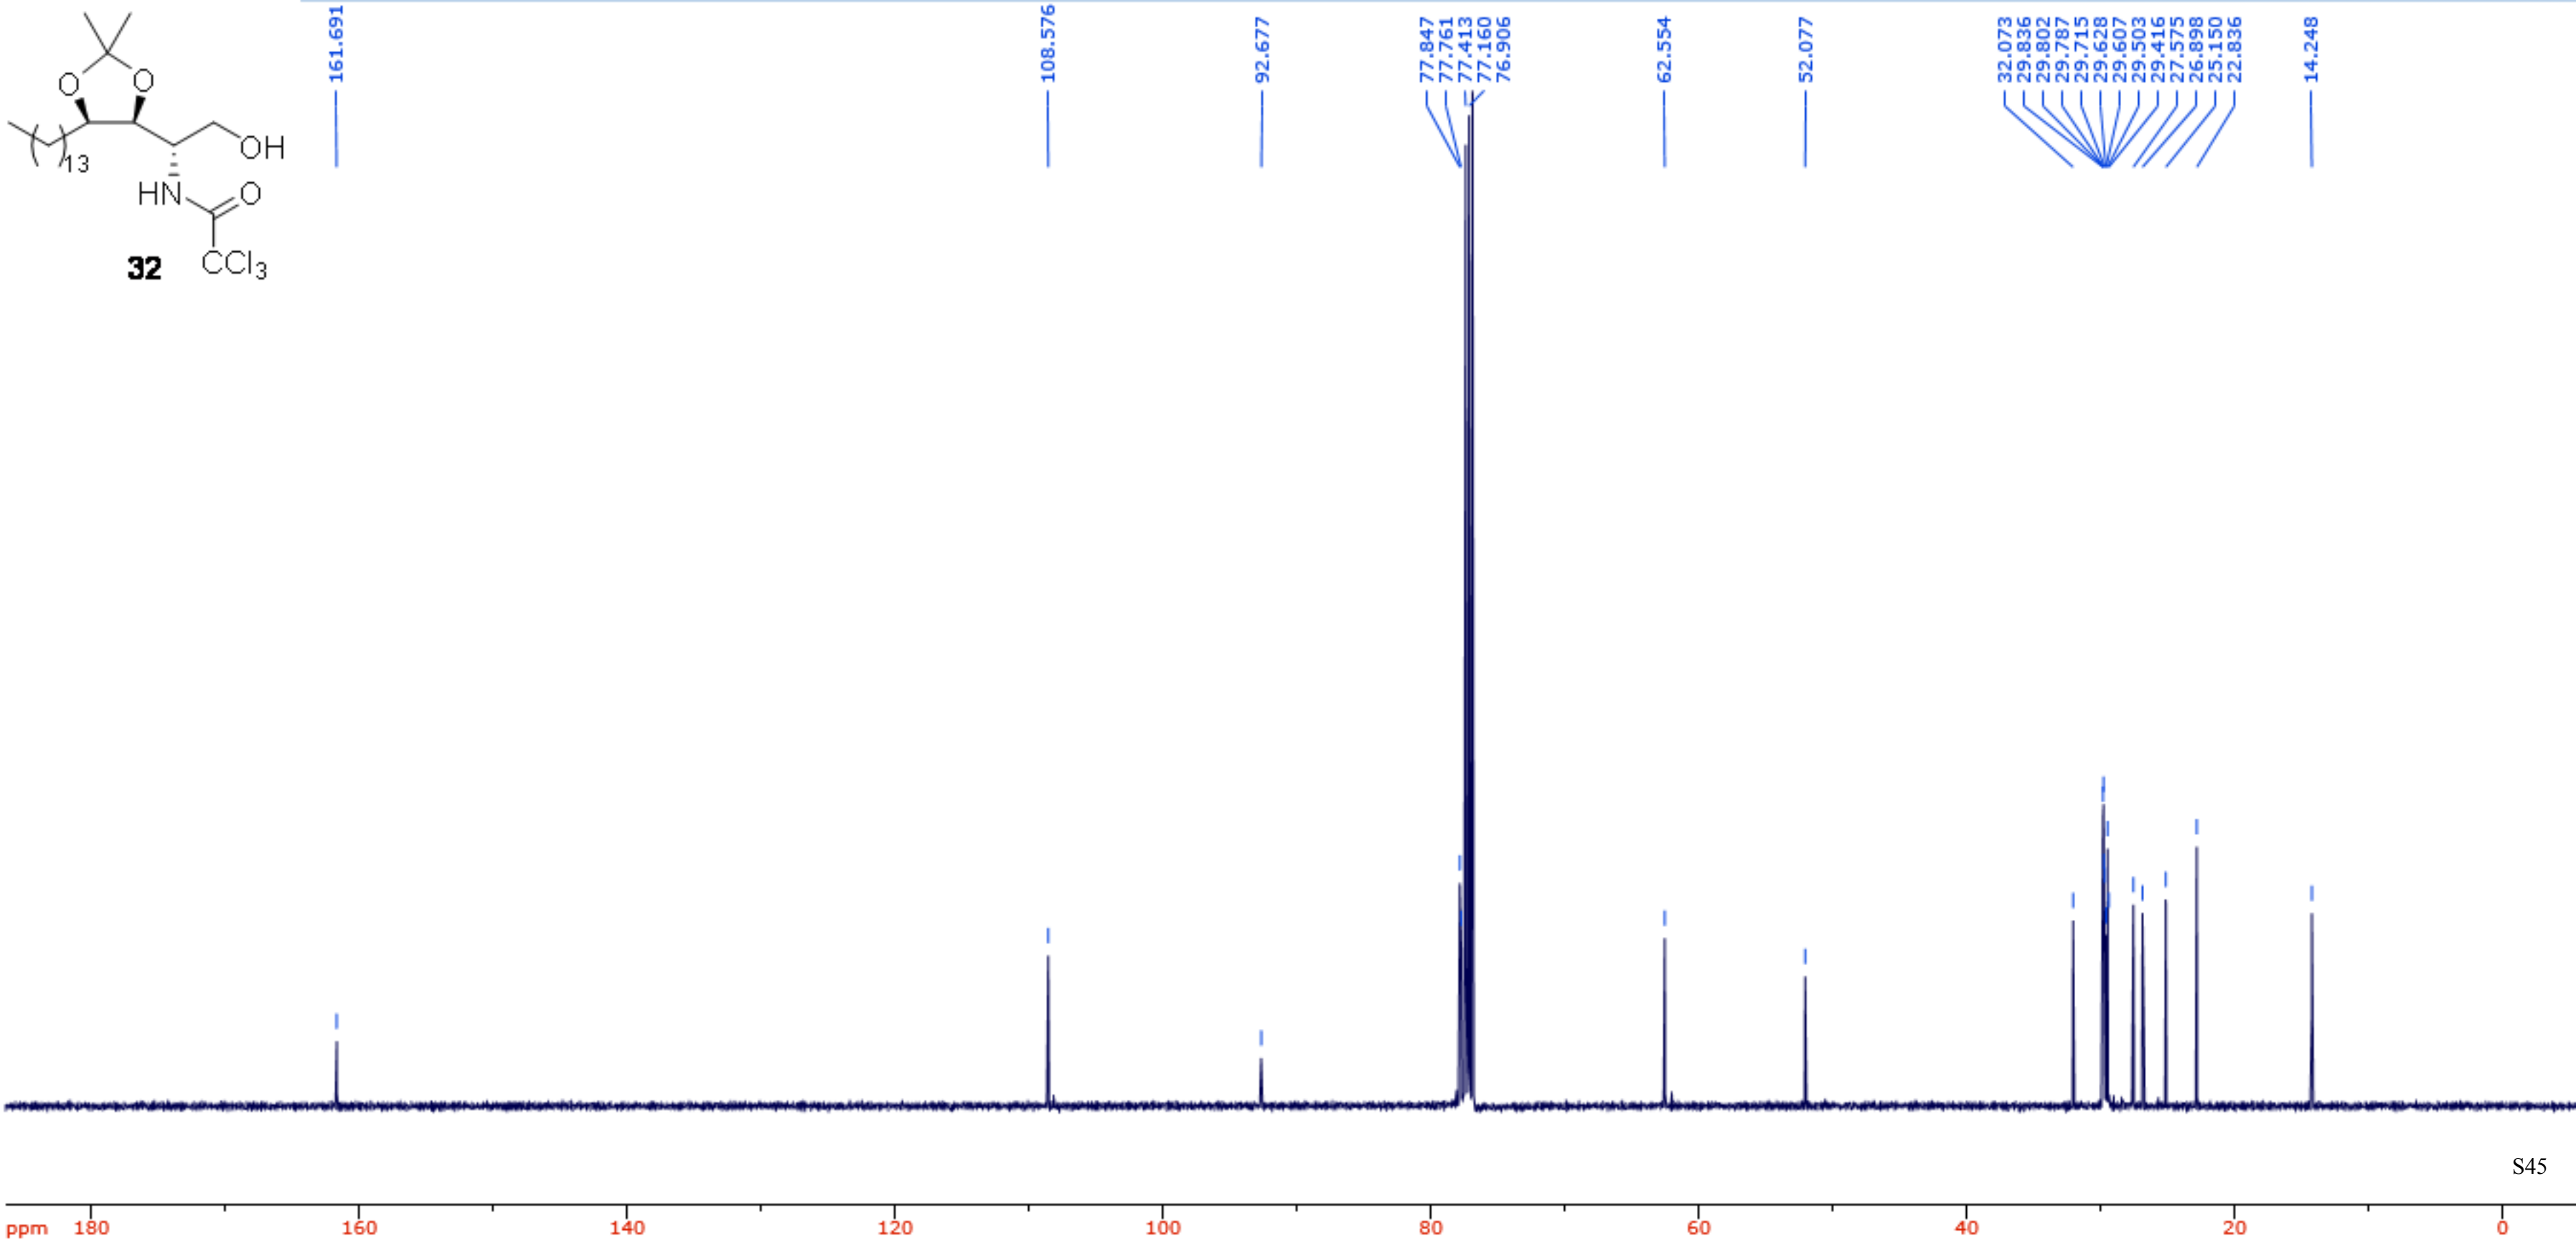

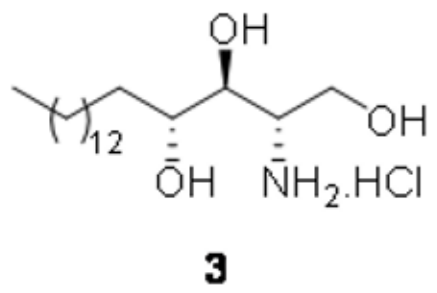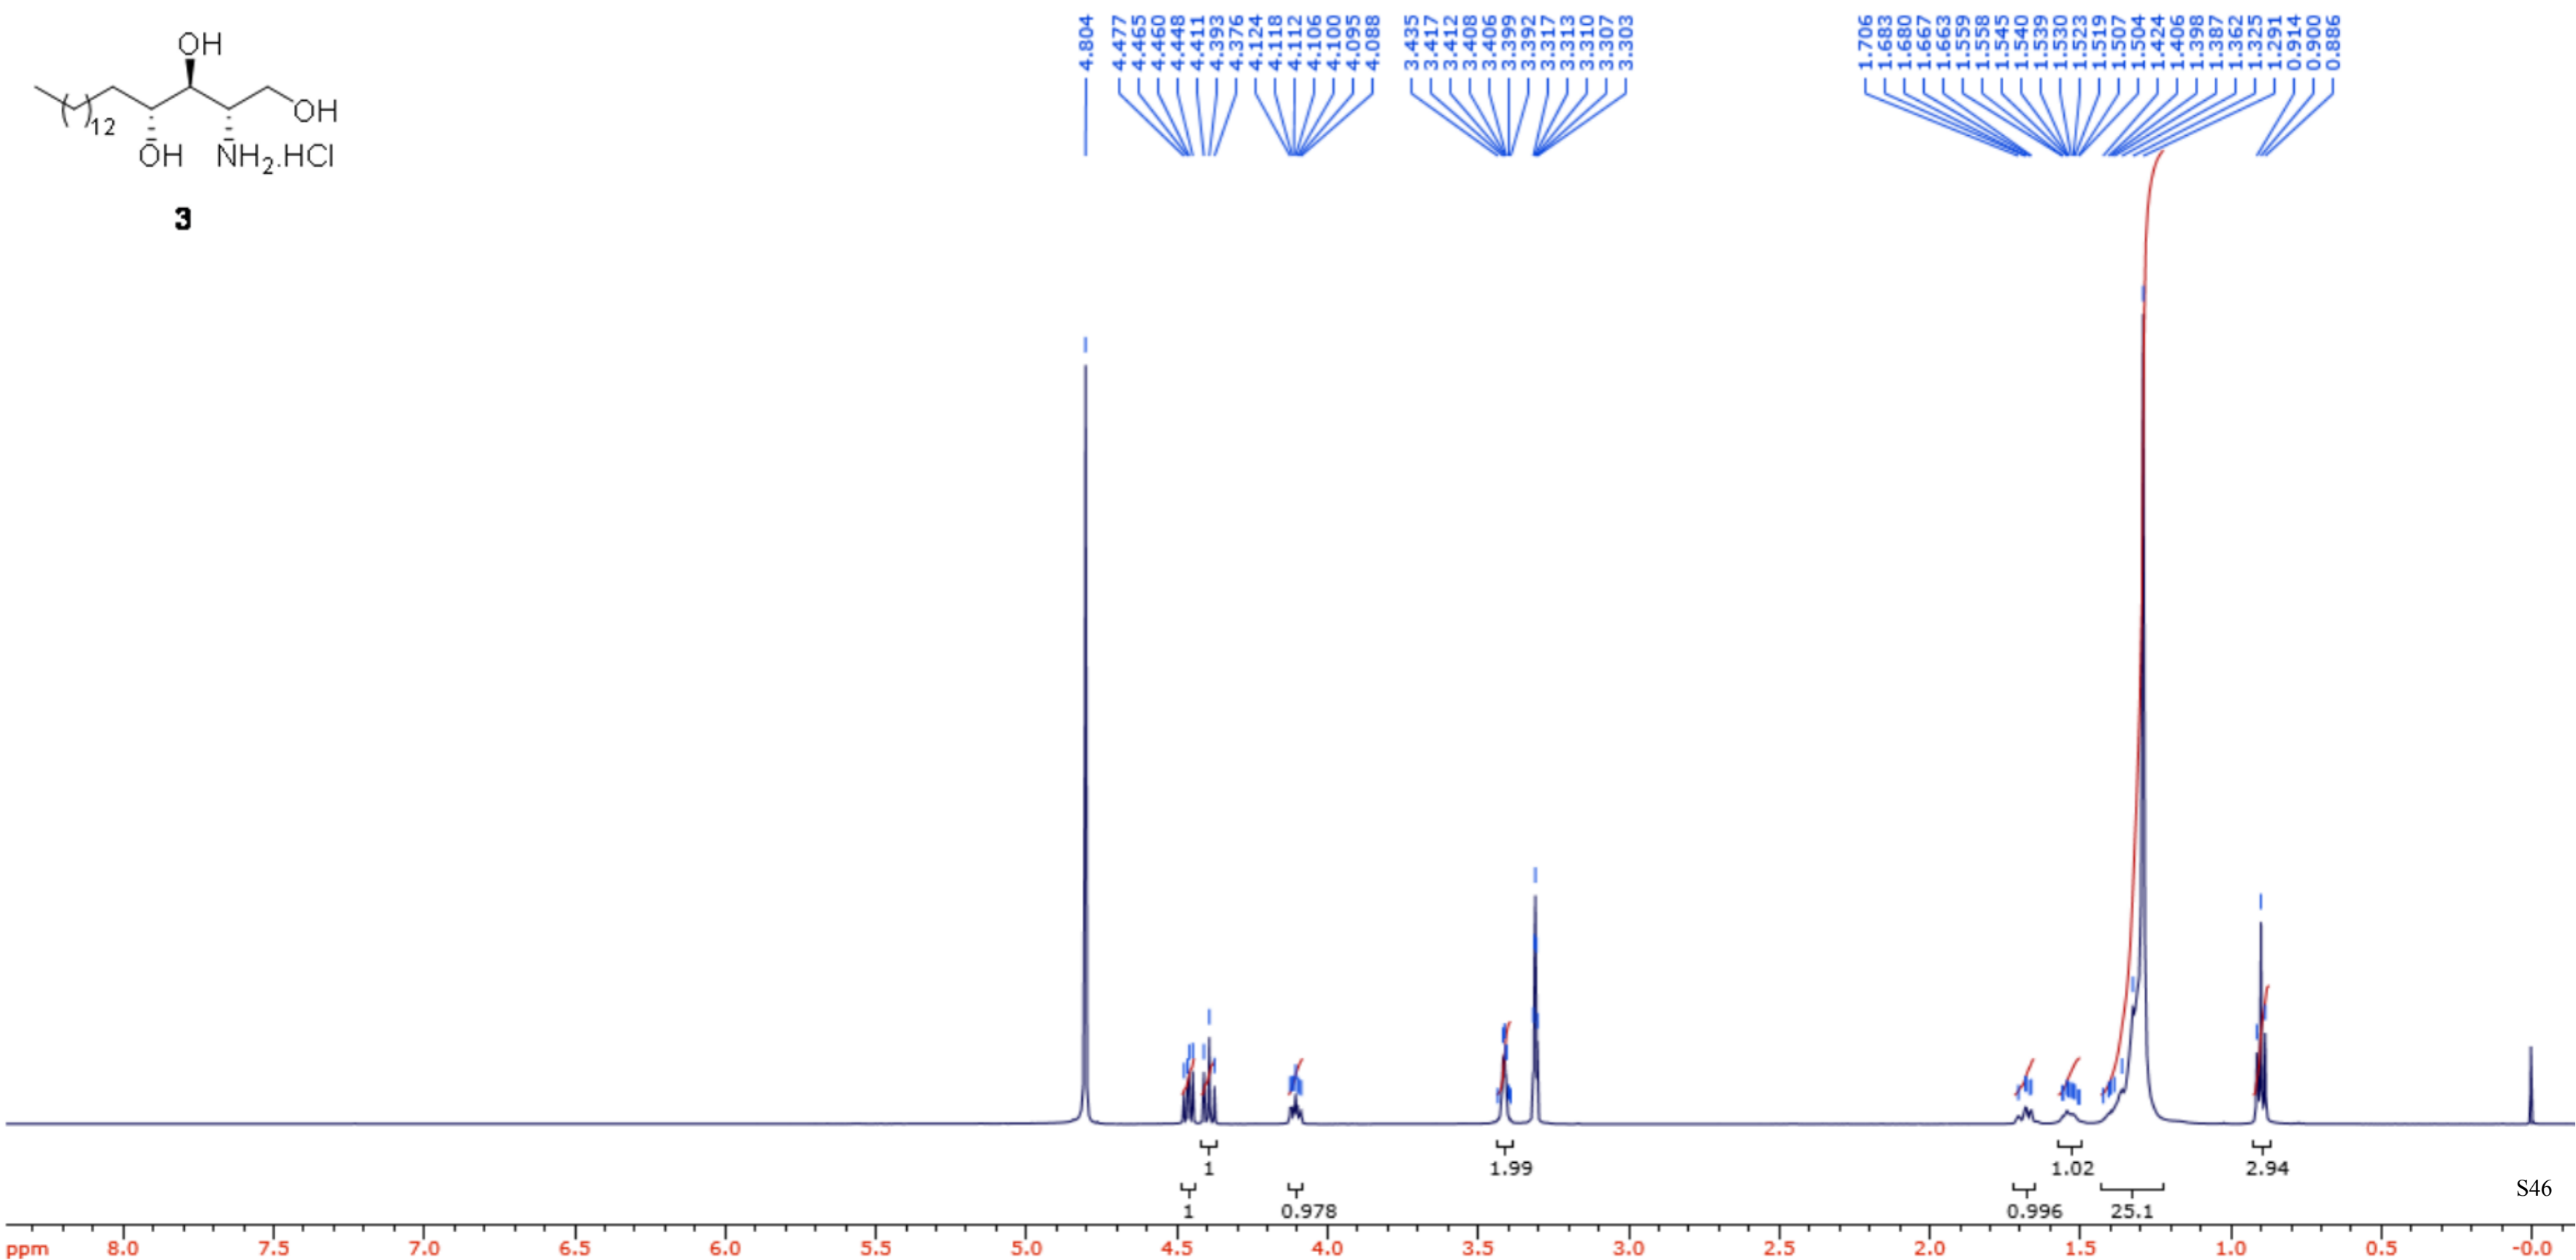

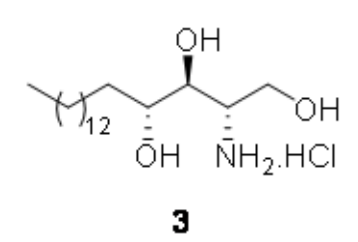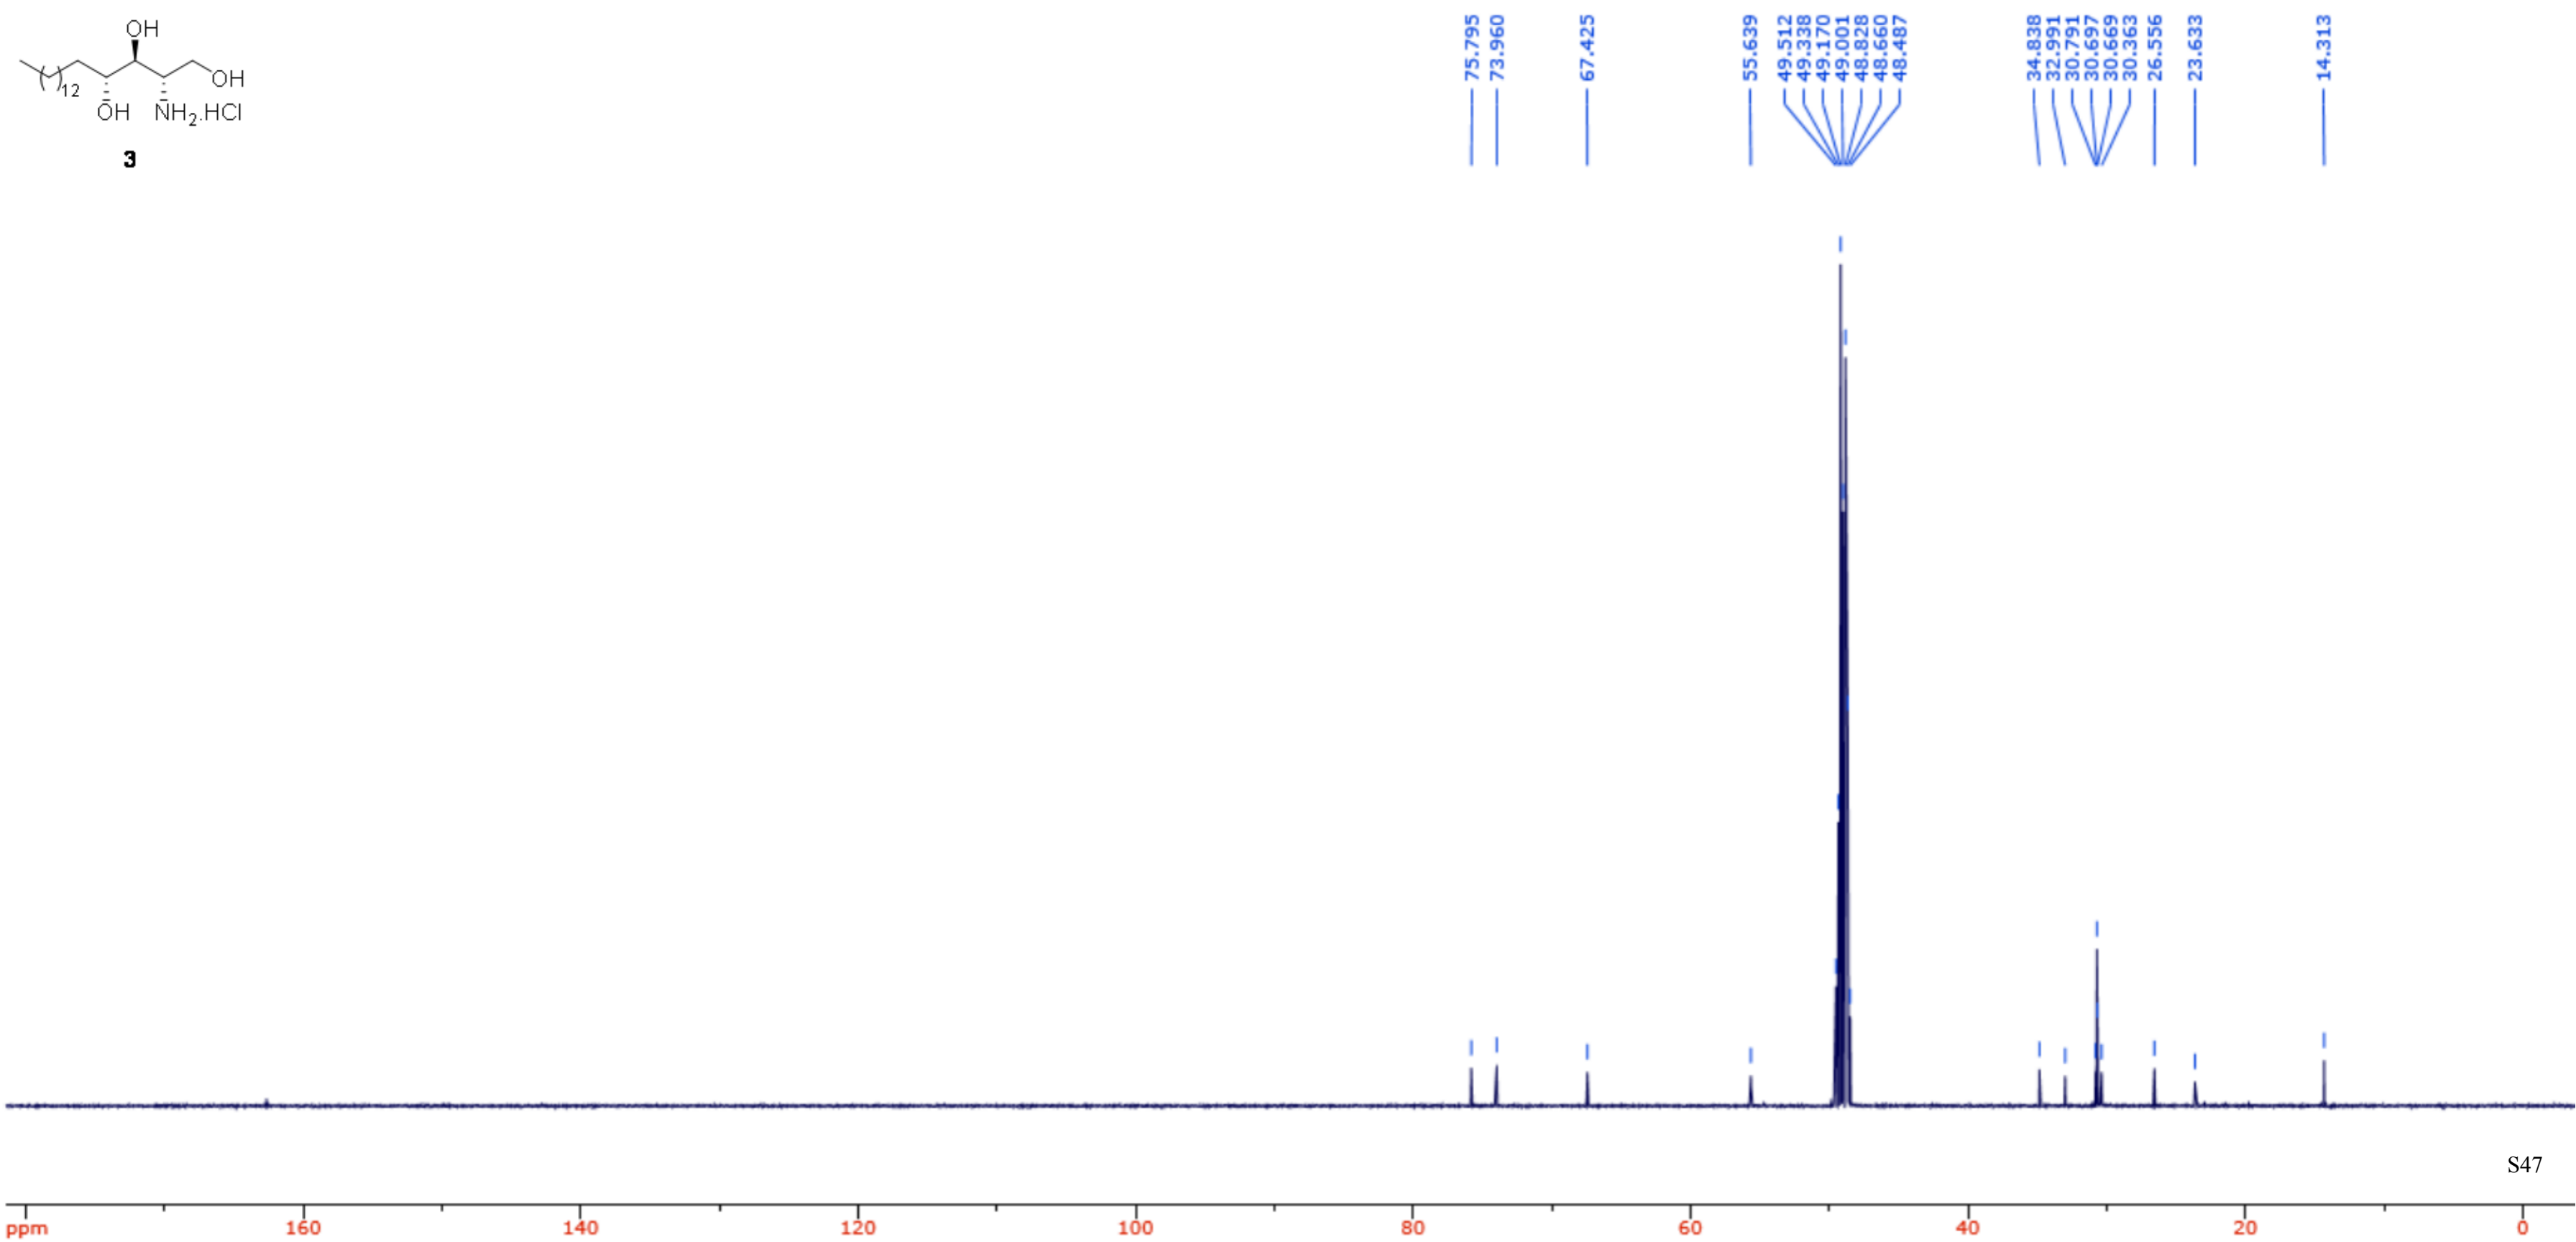

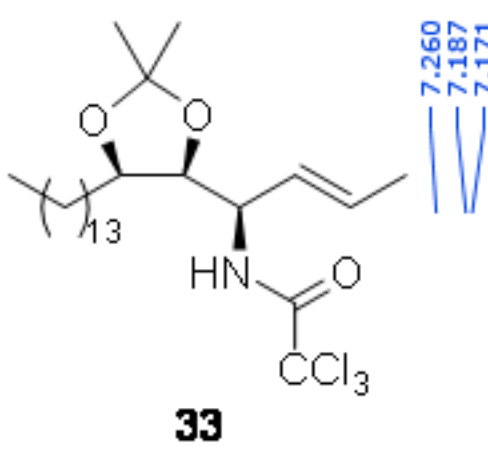

7.260  
7.187  
7.171

5.783  
5.781  
5.780  
5.770  
5.768  
5.757  
5.755  
5.750  
5.744  
5.739  
5.737  
5.726  
5.724  
5.713  
5.711  
5.478  
5.475  
5.472  
5.467  
5.465  
5.461  
5.458  
5.451  
5.448  
5.444  
5.441  
5.437  
5.434  
5.431  
5.428  
5.428  
4.346  
4.332  
4.331  
4.317  
4.231  
4.224  
4.217  
4.210  
4.193  
4.187  
4.183  
4.173  
4.170

1.727  
1.725  
1.724  
1.722  
1.714  
1.712  
1.711  
1.709  
1.569  
1.553  
1.536  
1.521  
1.496  
1.480  
1.467  
1.374  
1.361  
1.339  
1.324  
1.297  
1.282  
1.244  
0.892  
0.878  
0.864

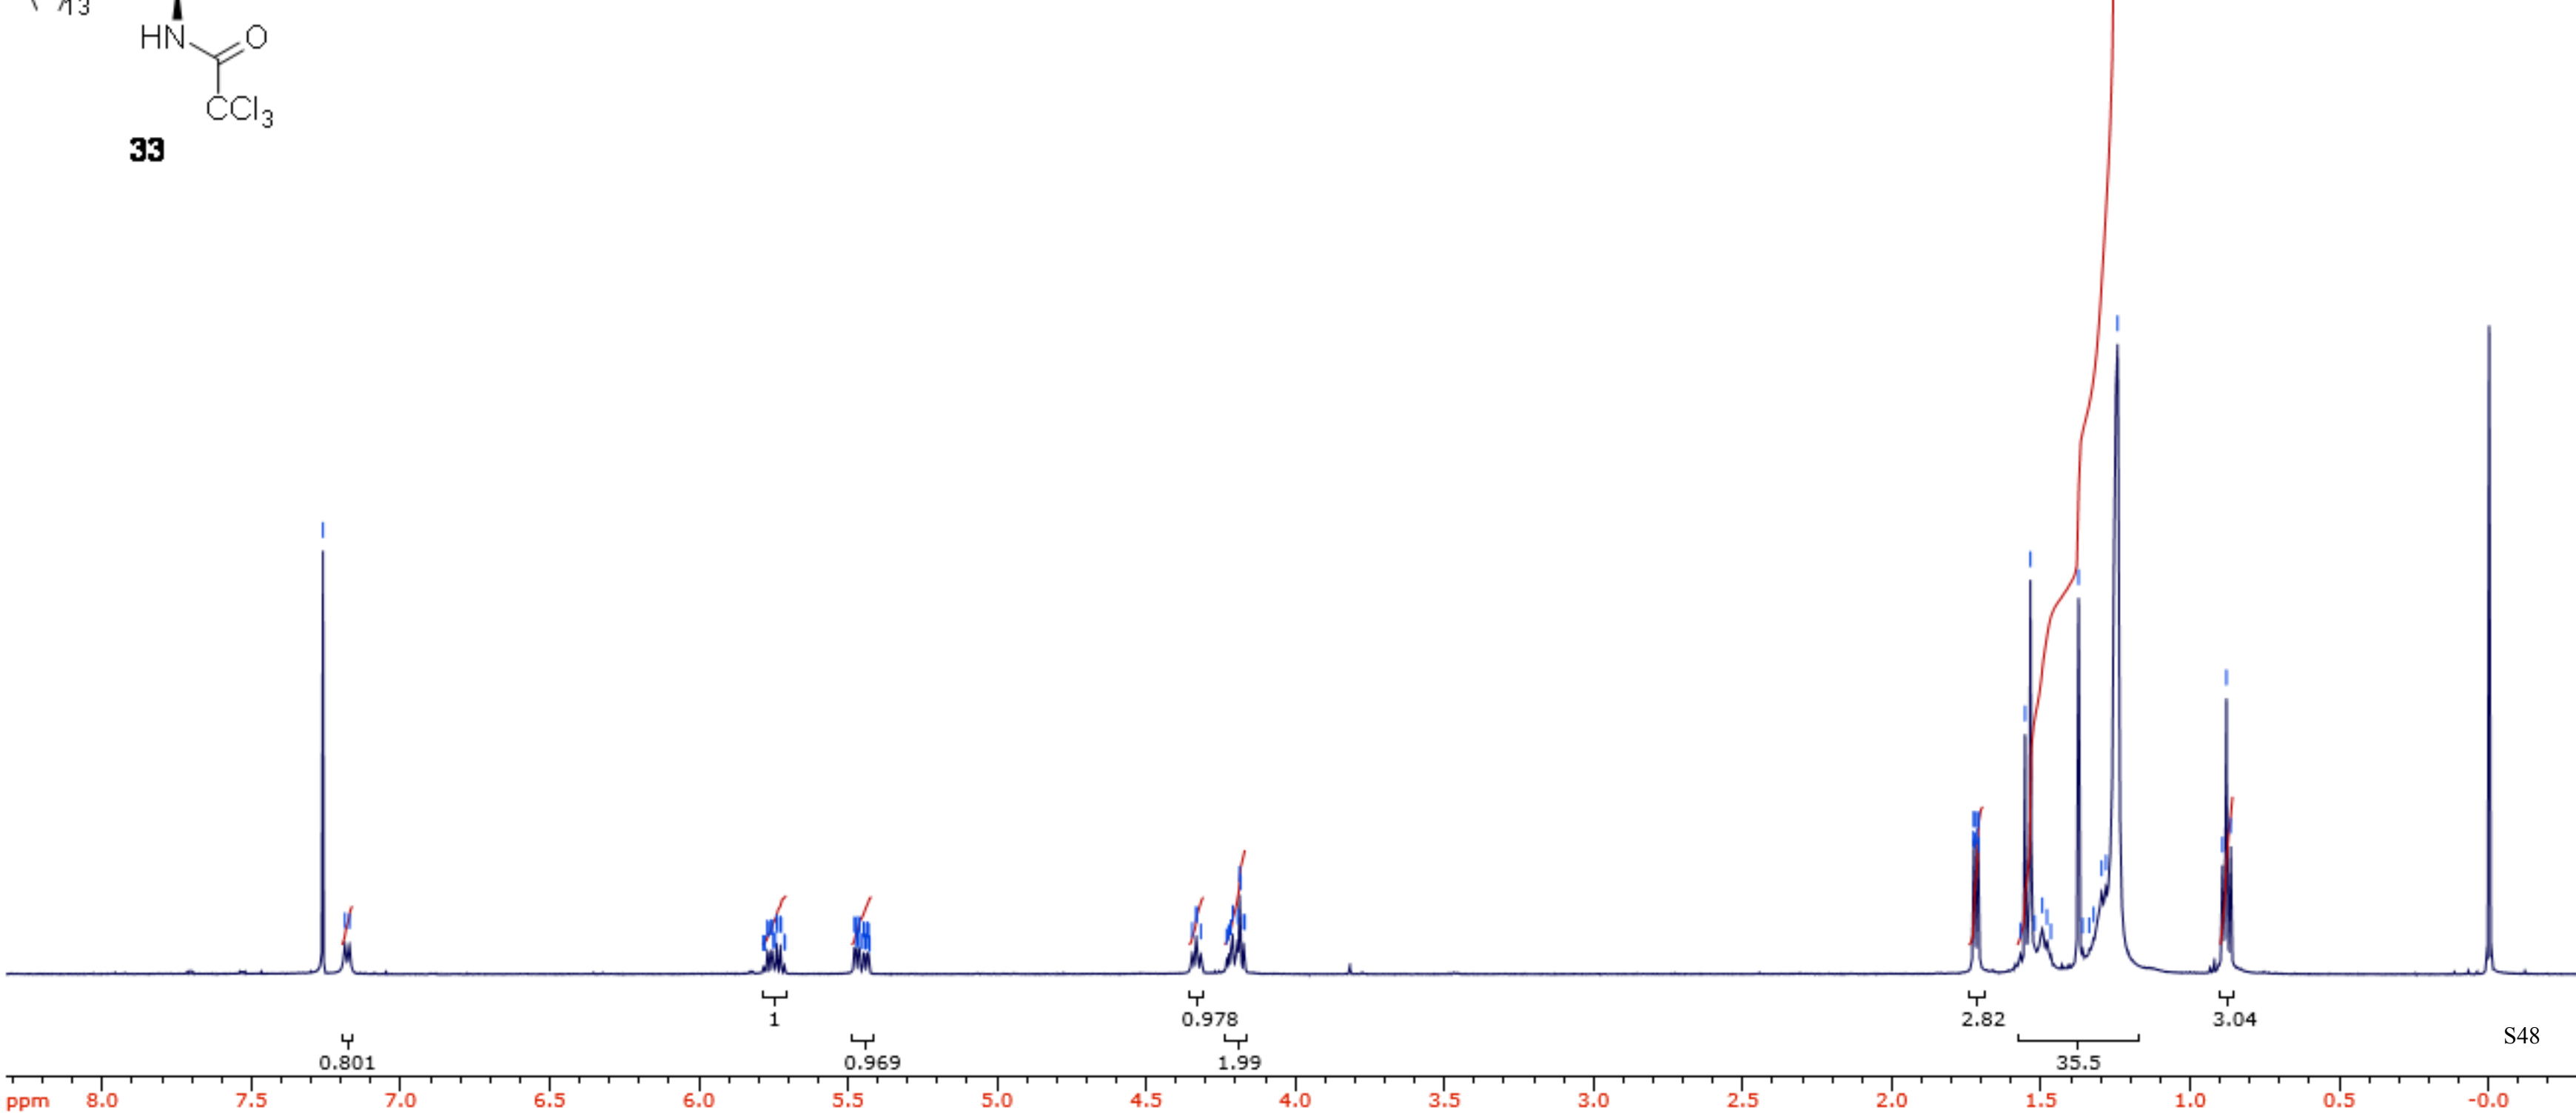



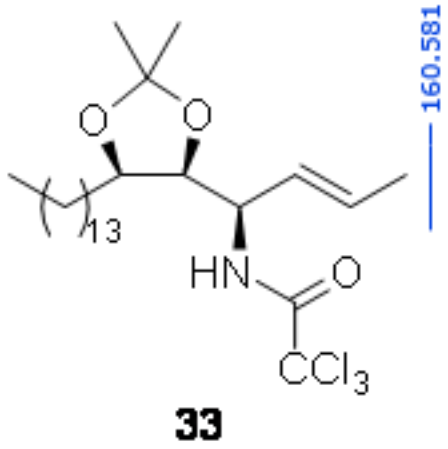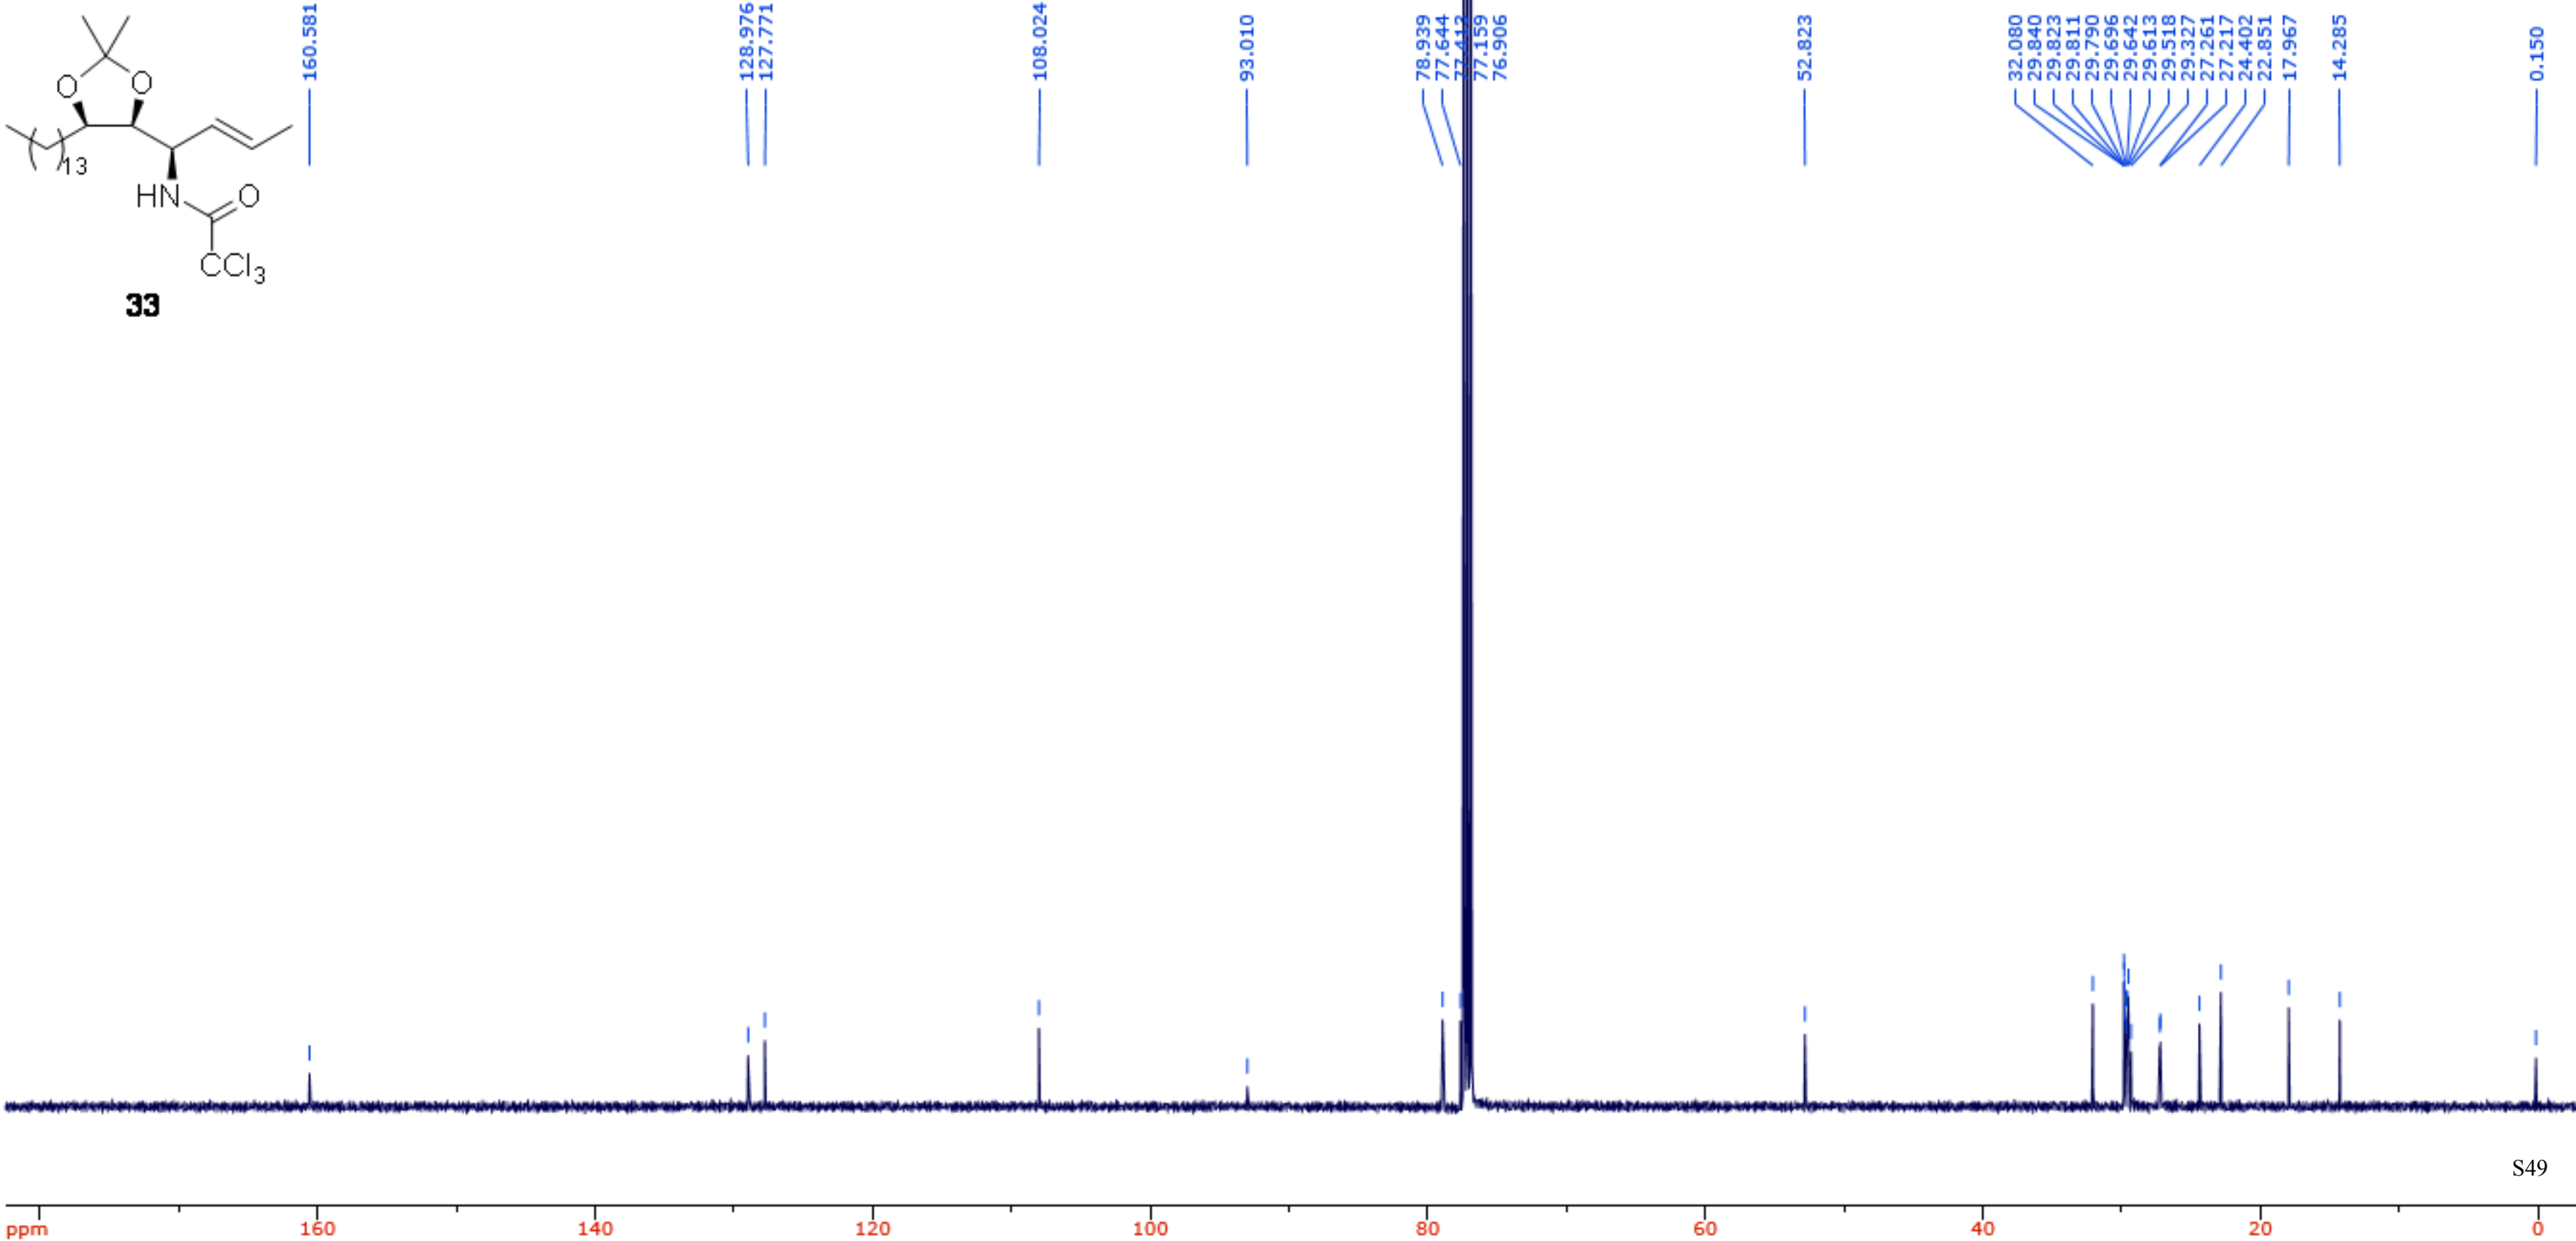

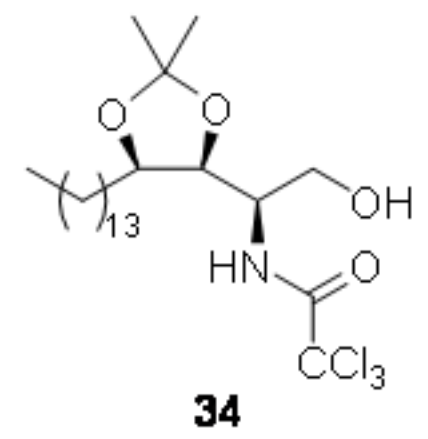

7.285  
7.278  
7.259

4.445  
4.442  
4.428  
4.424  
4.301  
4.292  
4.283  
4.280  
4.274  
4.269  
4.254  
4.252  
3.994  
3.991  
3.981  
3.978  
3.975  
3.972  
3.966  
3.962  
3.959  
3.955  
3.946  
3.943  
3.847  
3.834  
3.819  
3.807  
3.787  
3.771  
3.760  
3.744

1.596  
1.570  
1.558  
1.548  
1.524  
1.514  
1.493  
1.480  
1.468  
1.451  
1.420  
1.406  
1.398  
1.355  
1.336  
1.320  
1.302  
1.266  
0.917  
0.900  
0.882

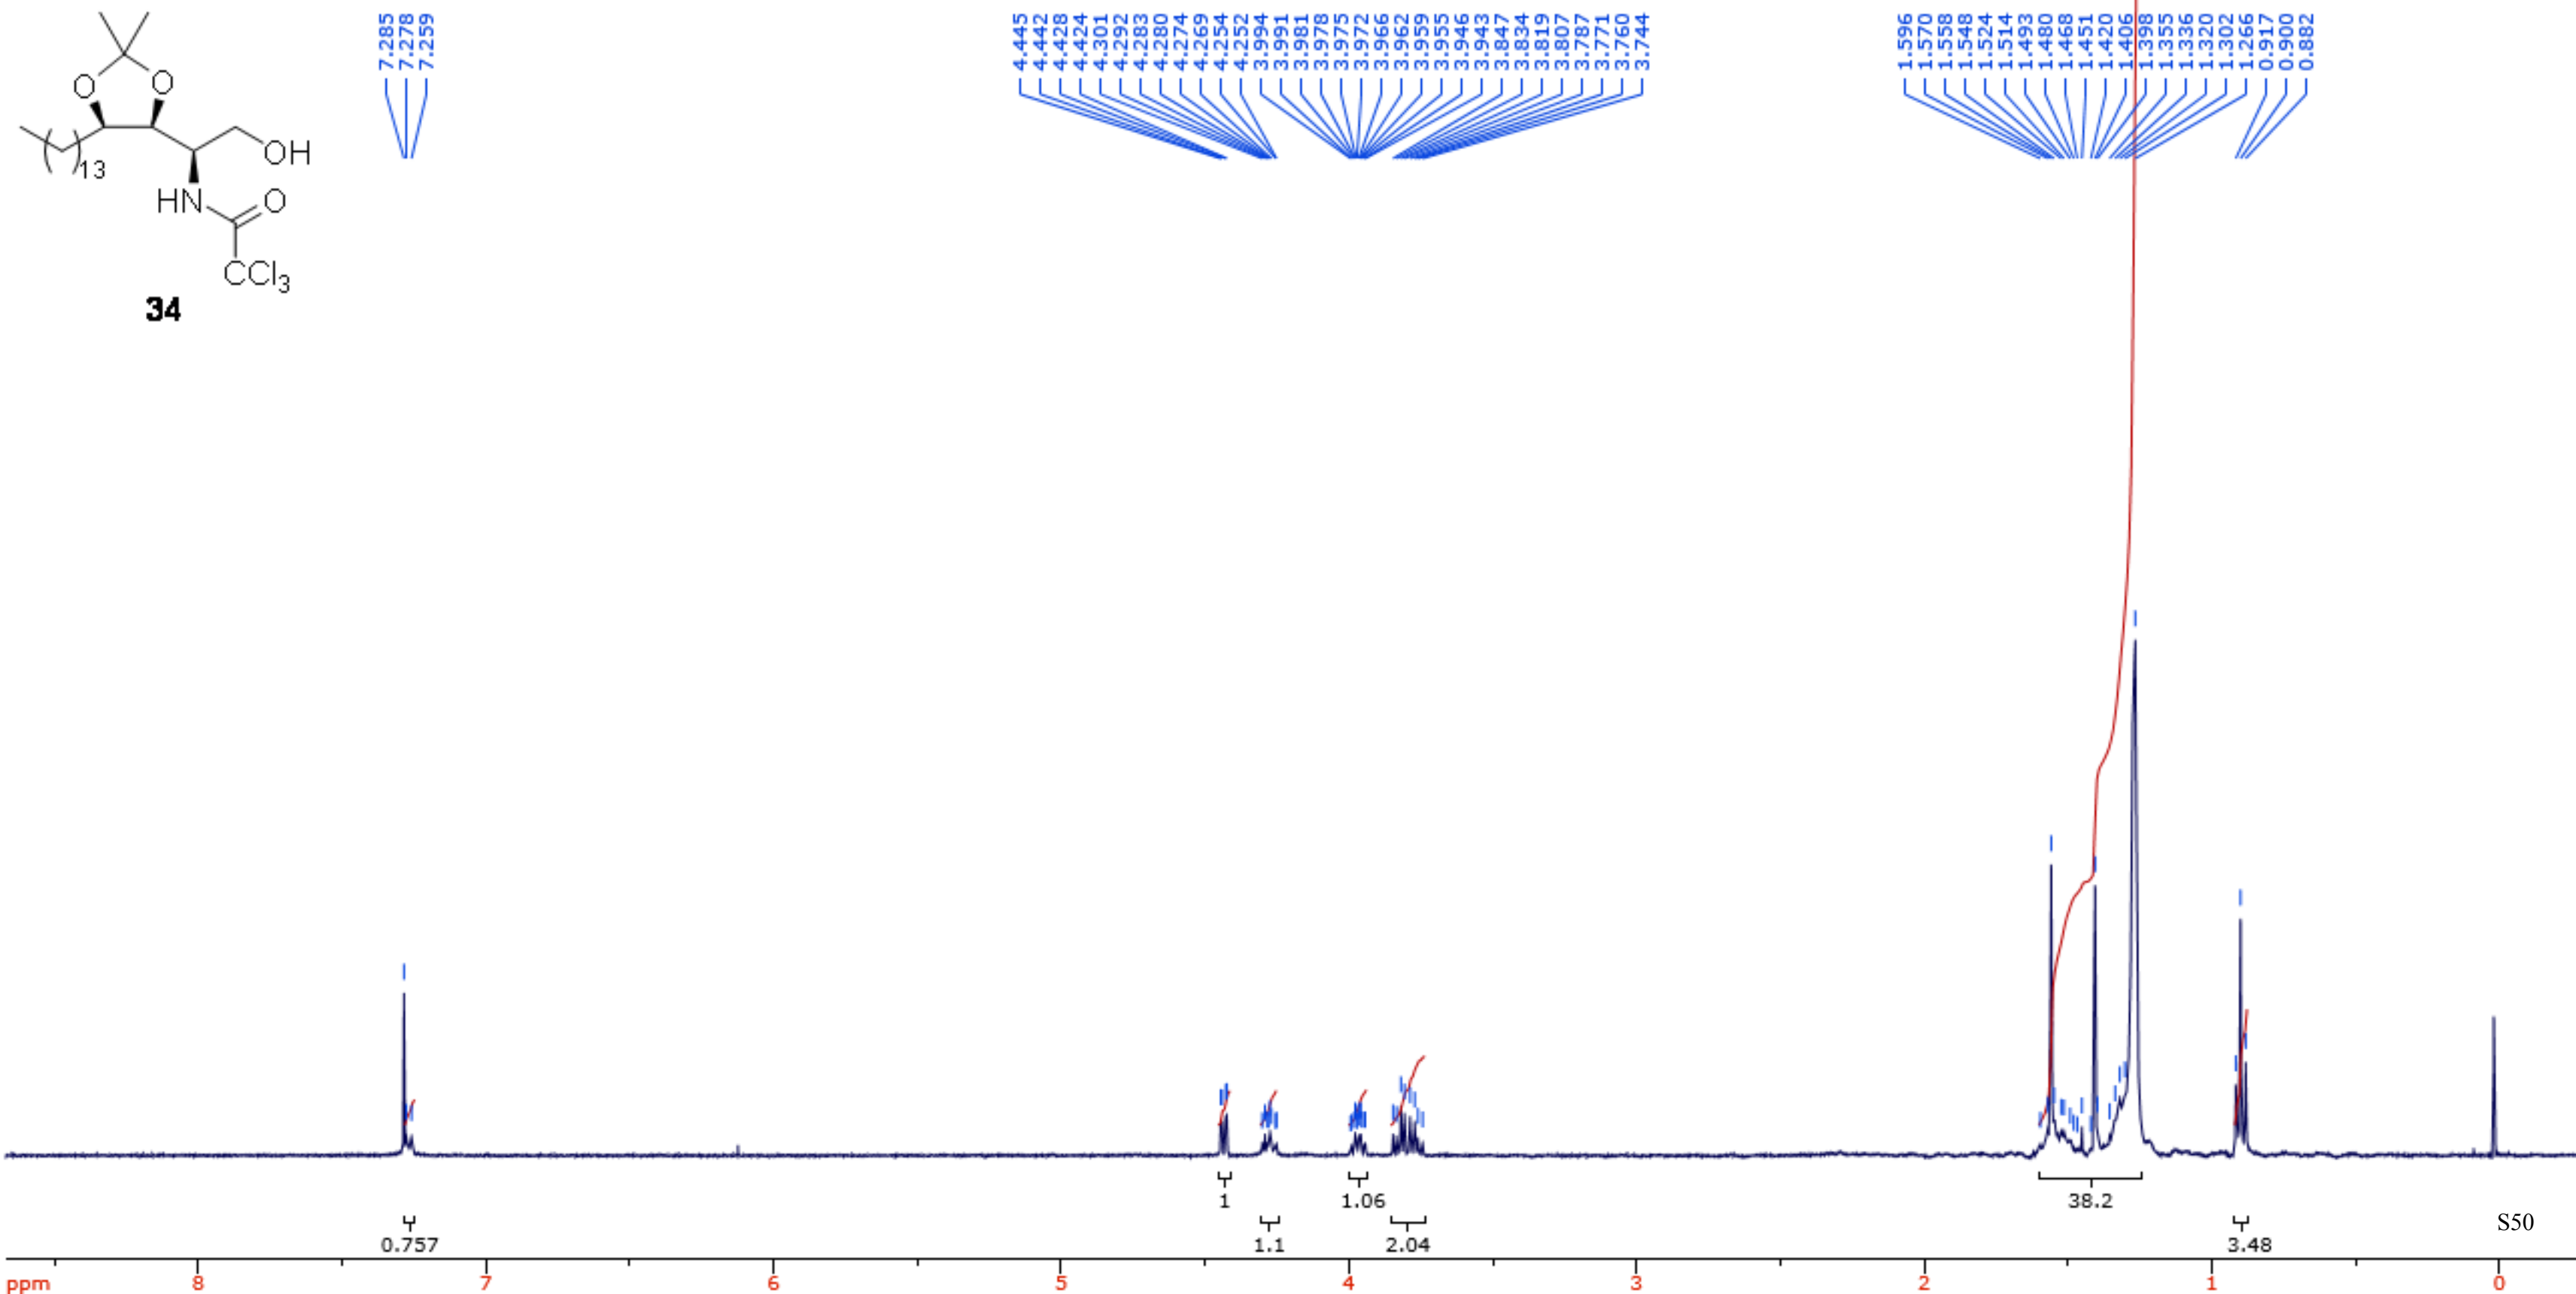

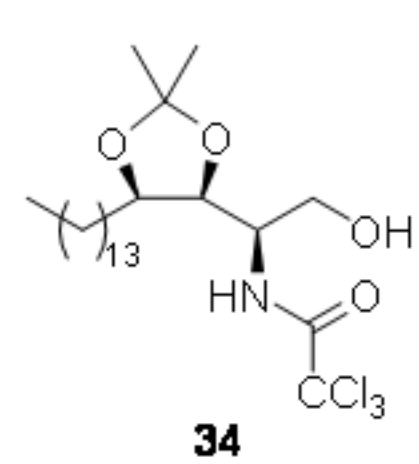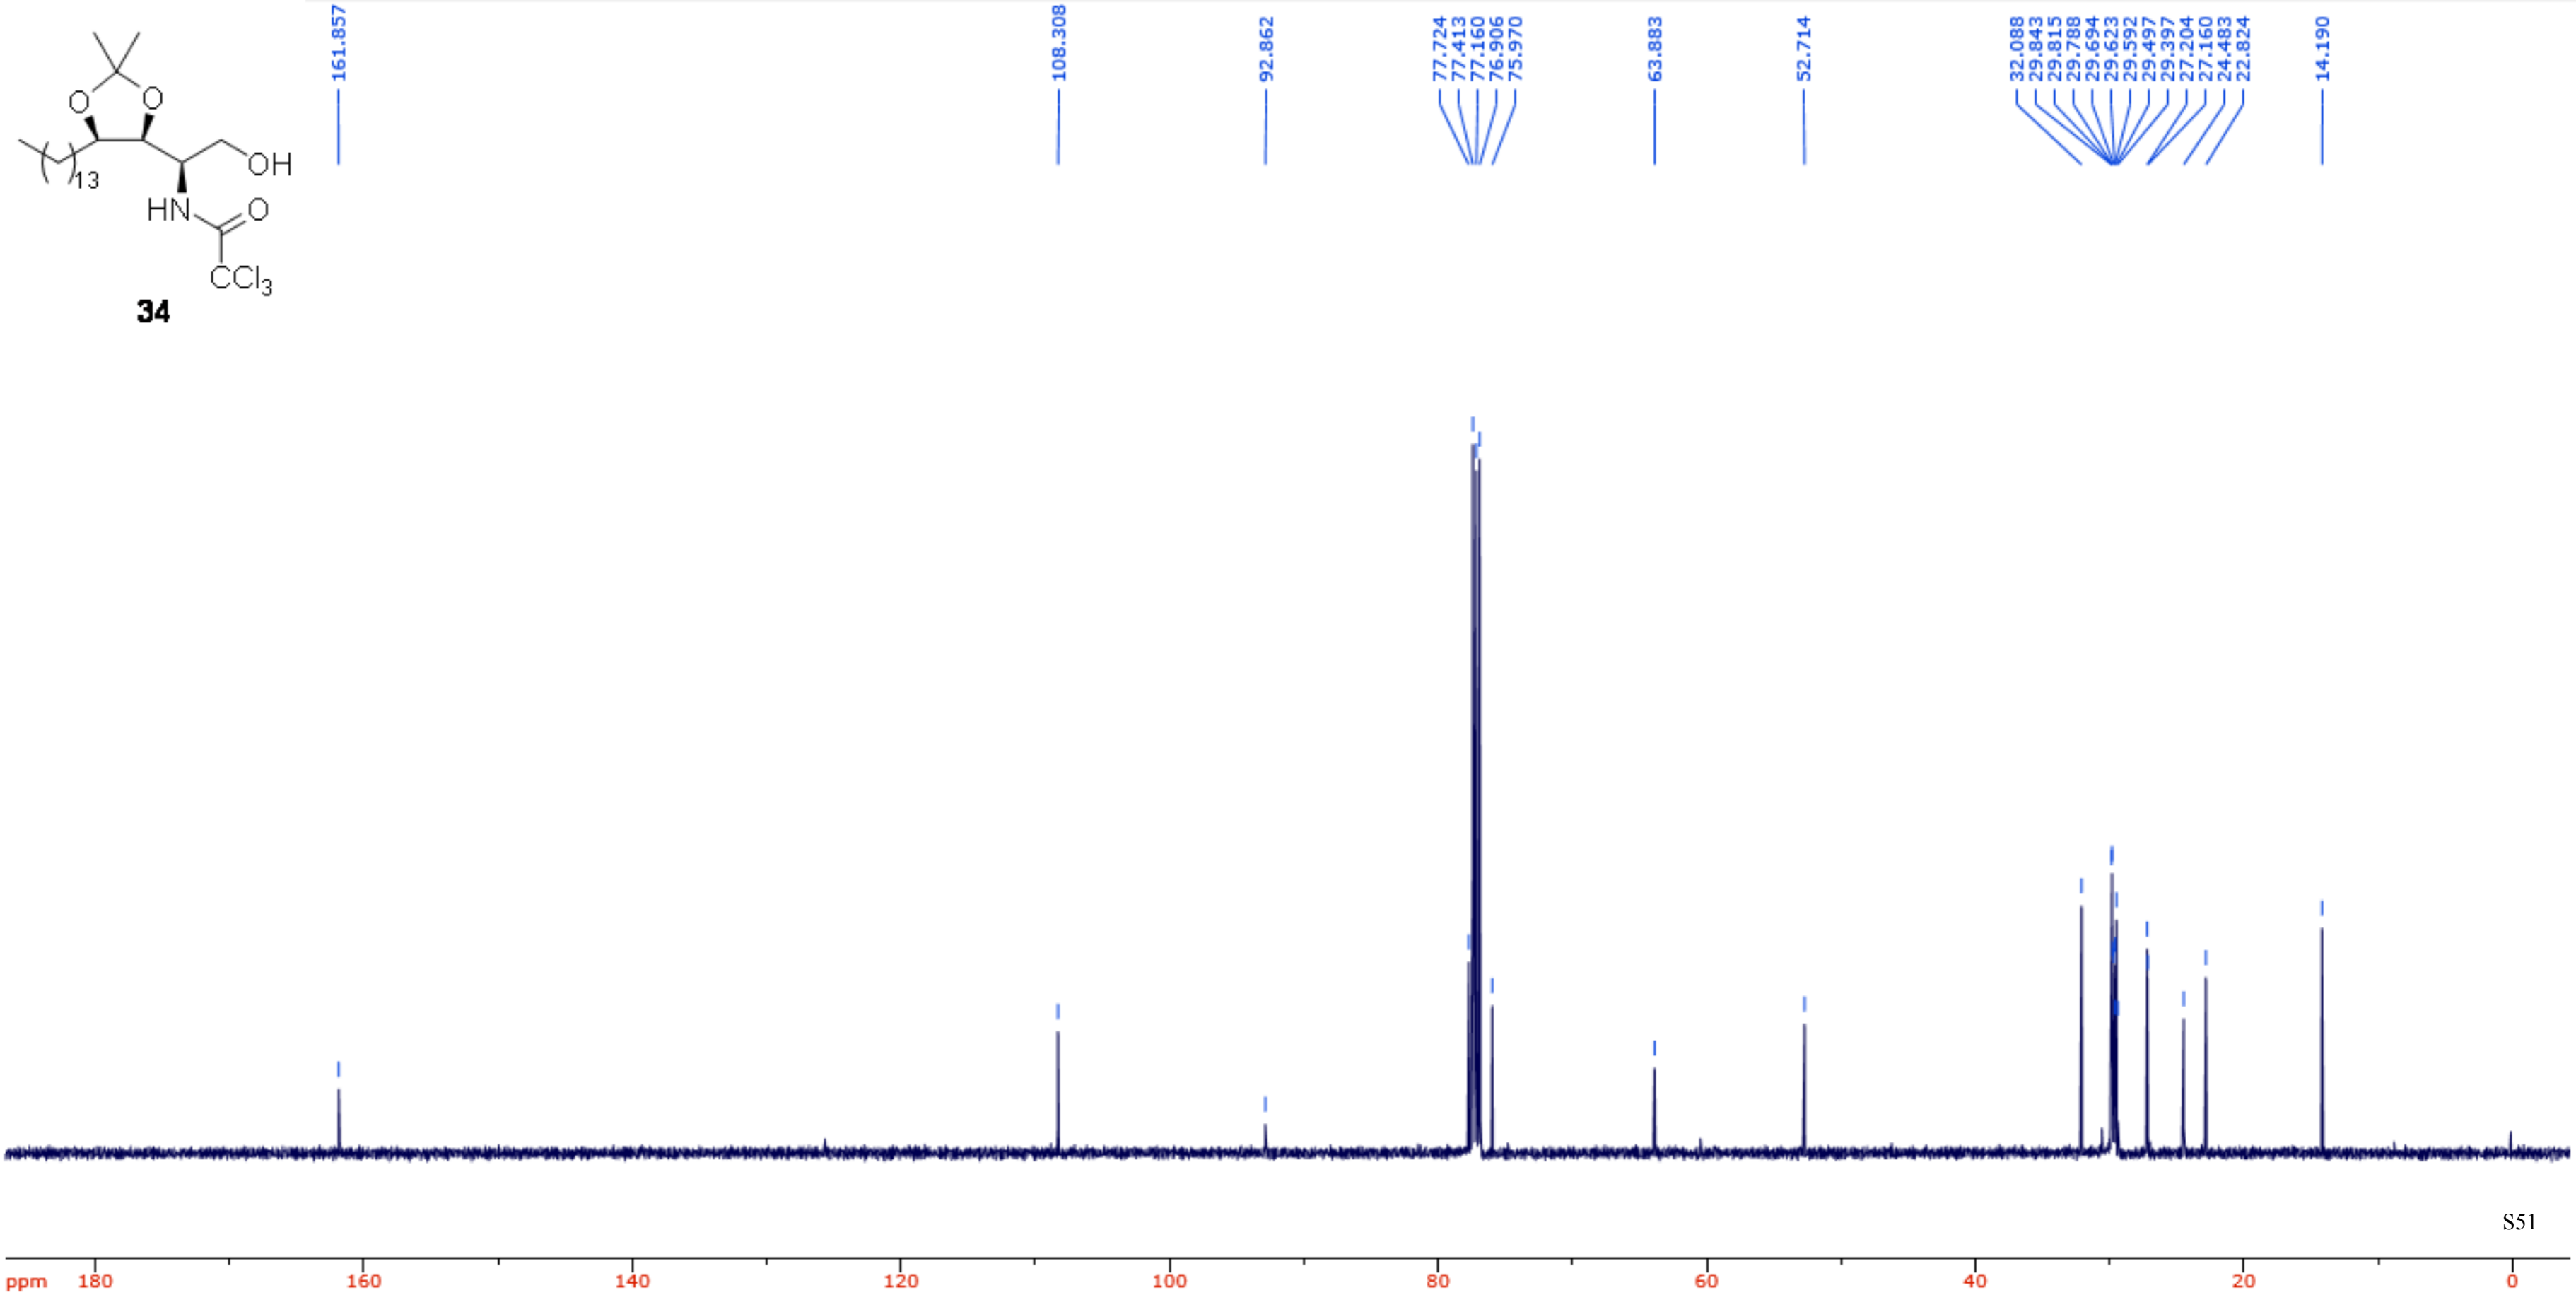

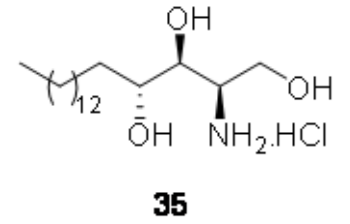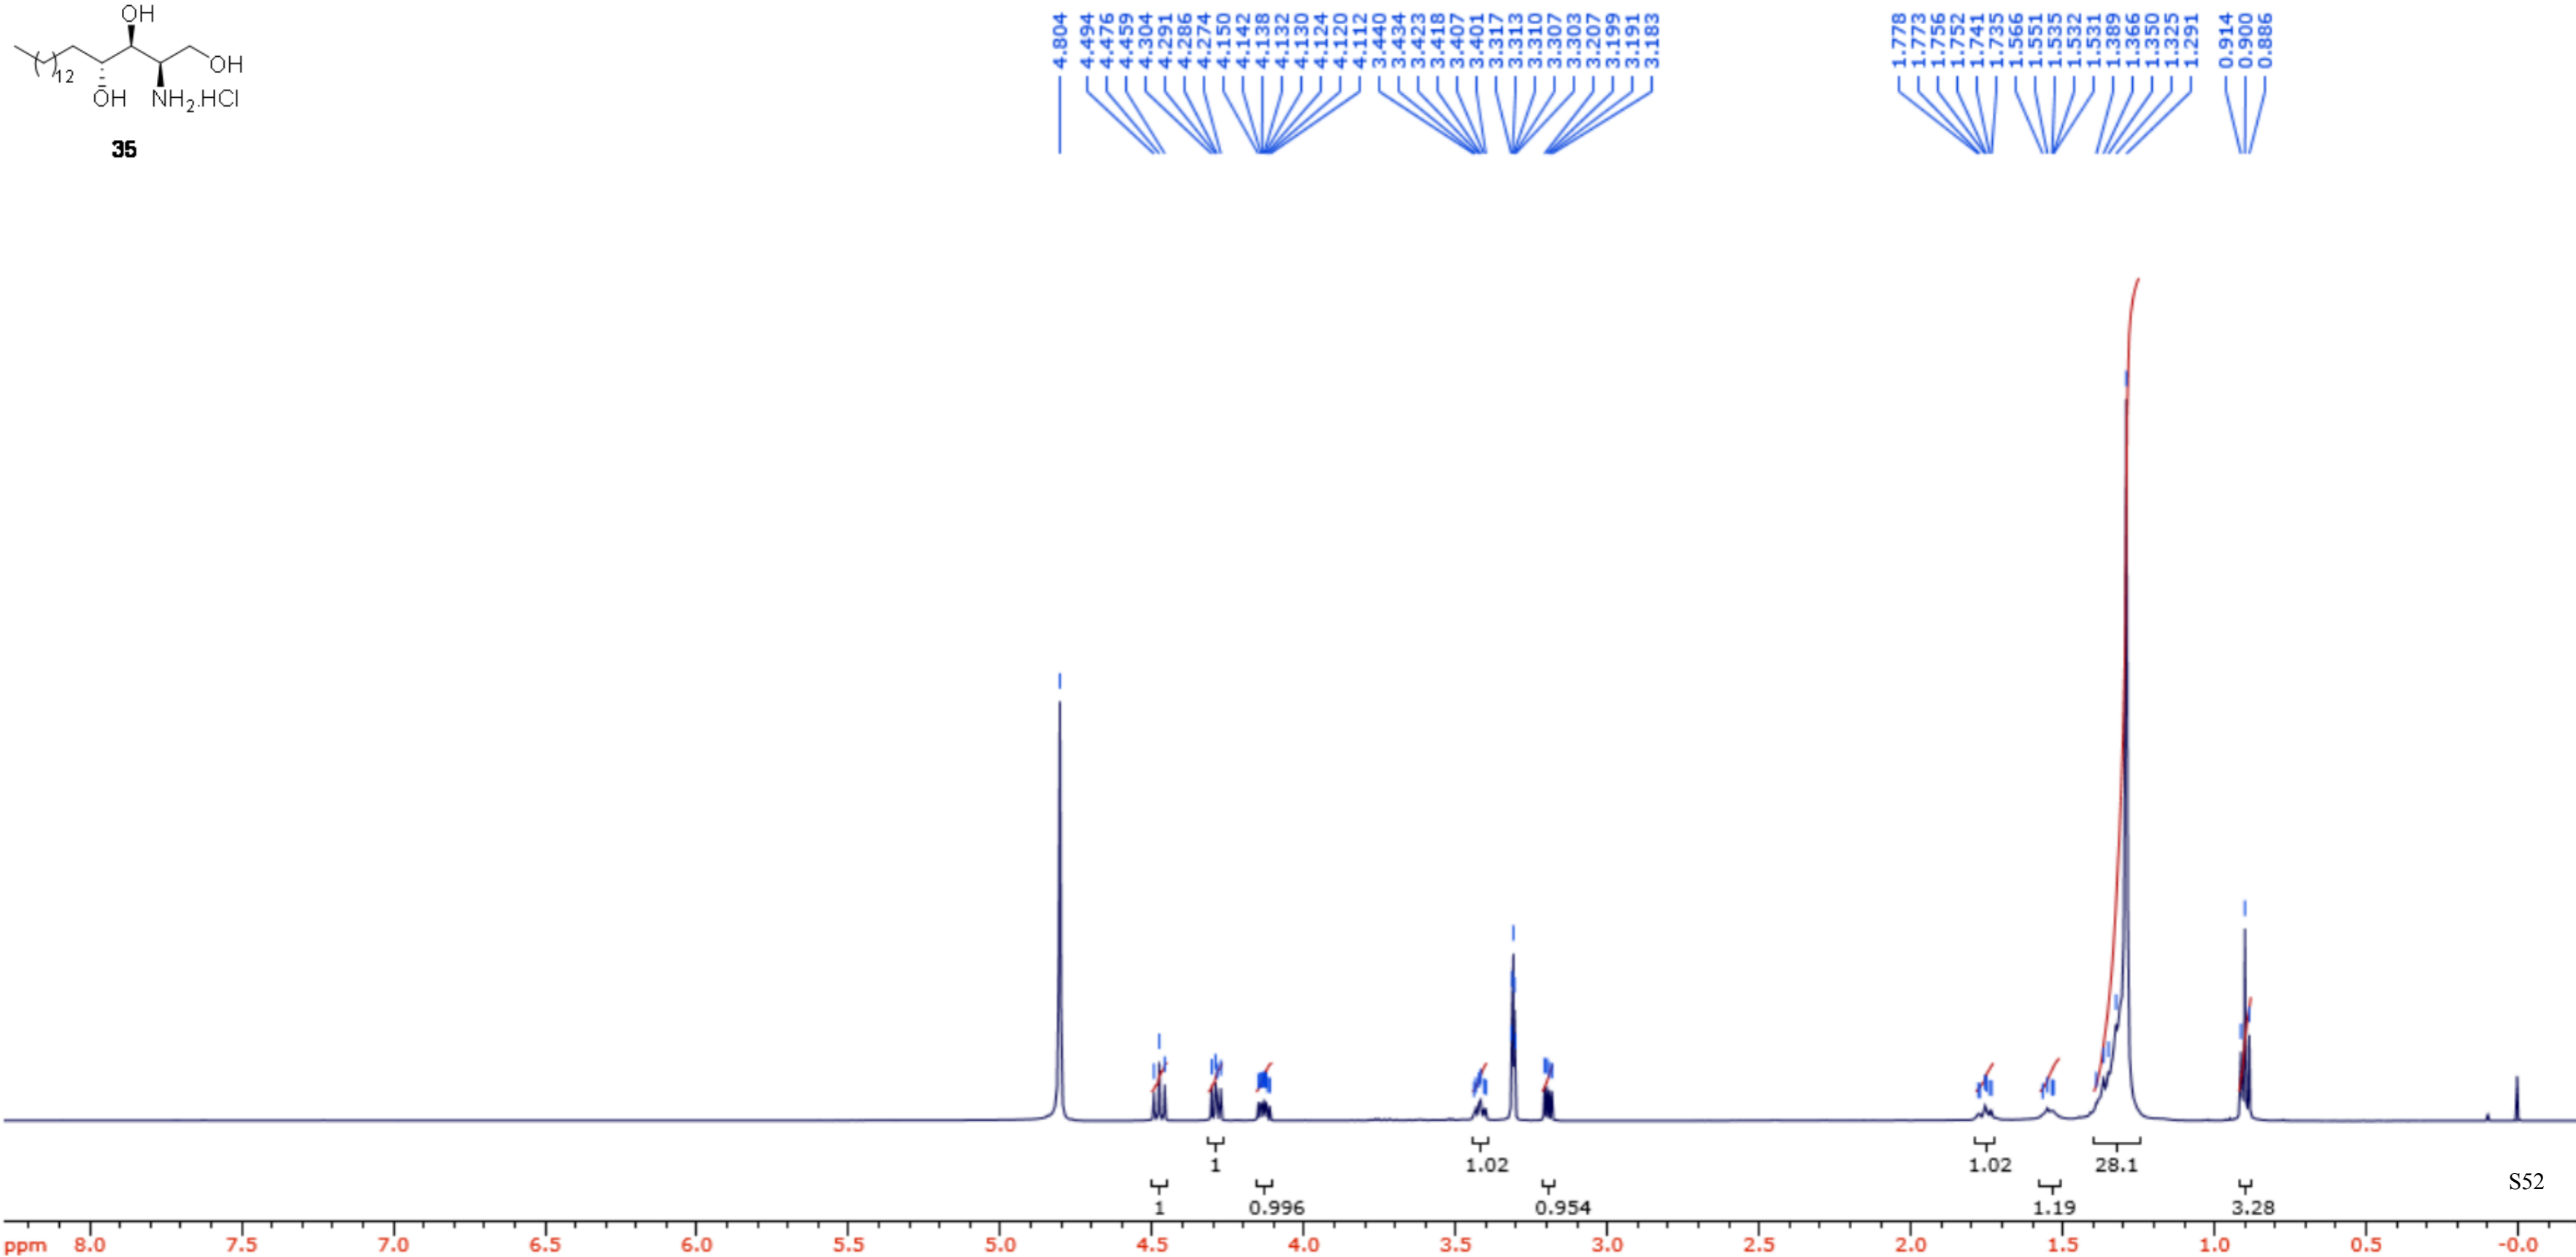

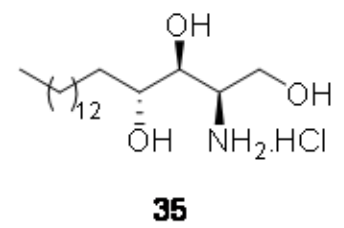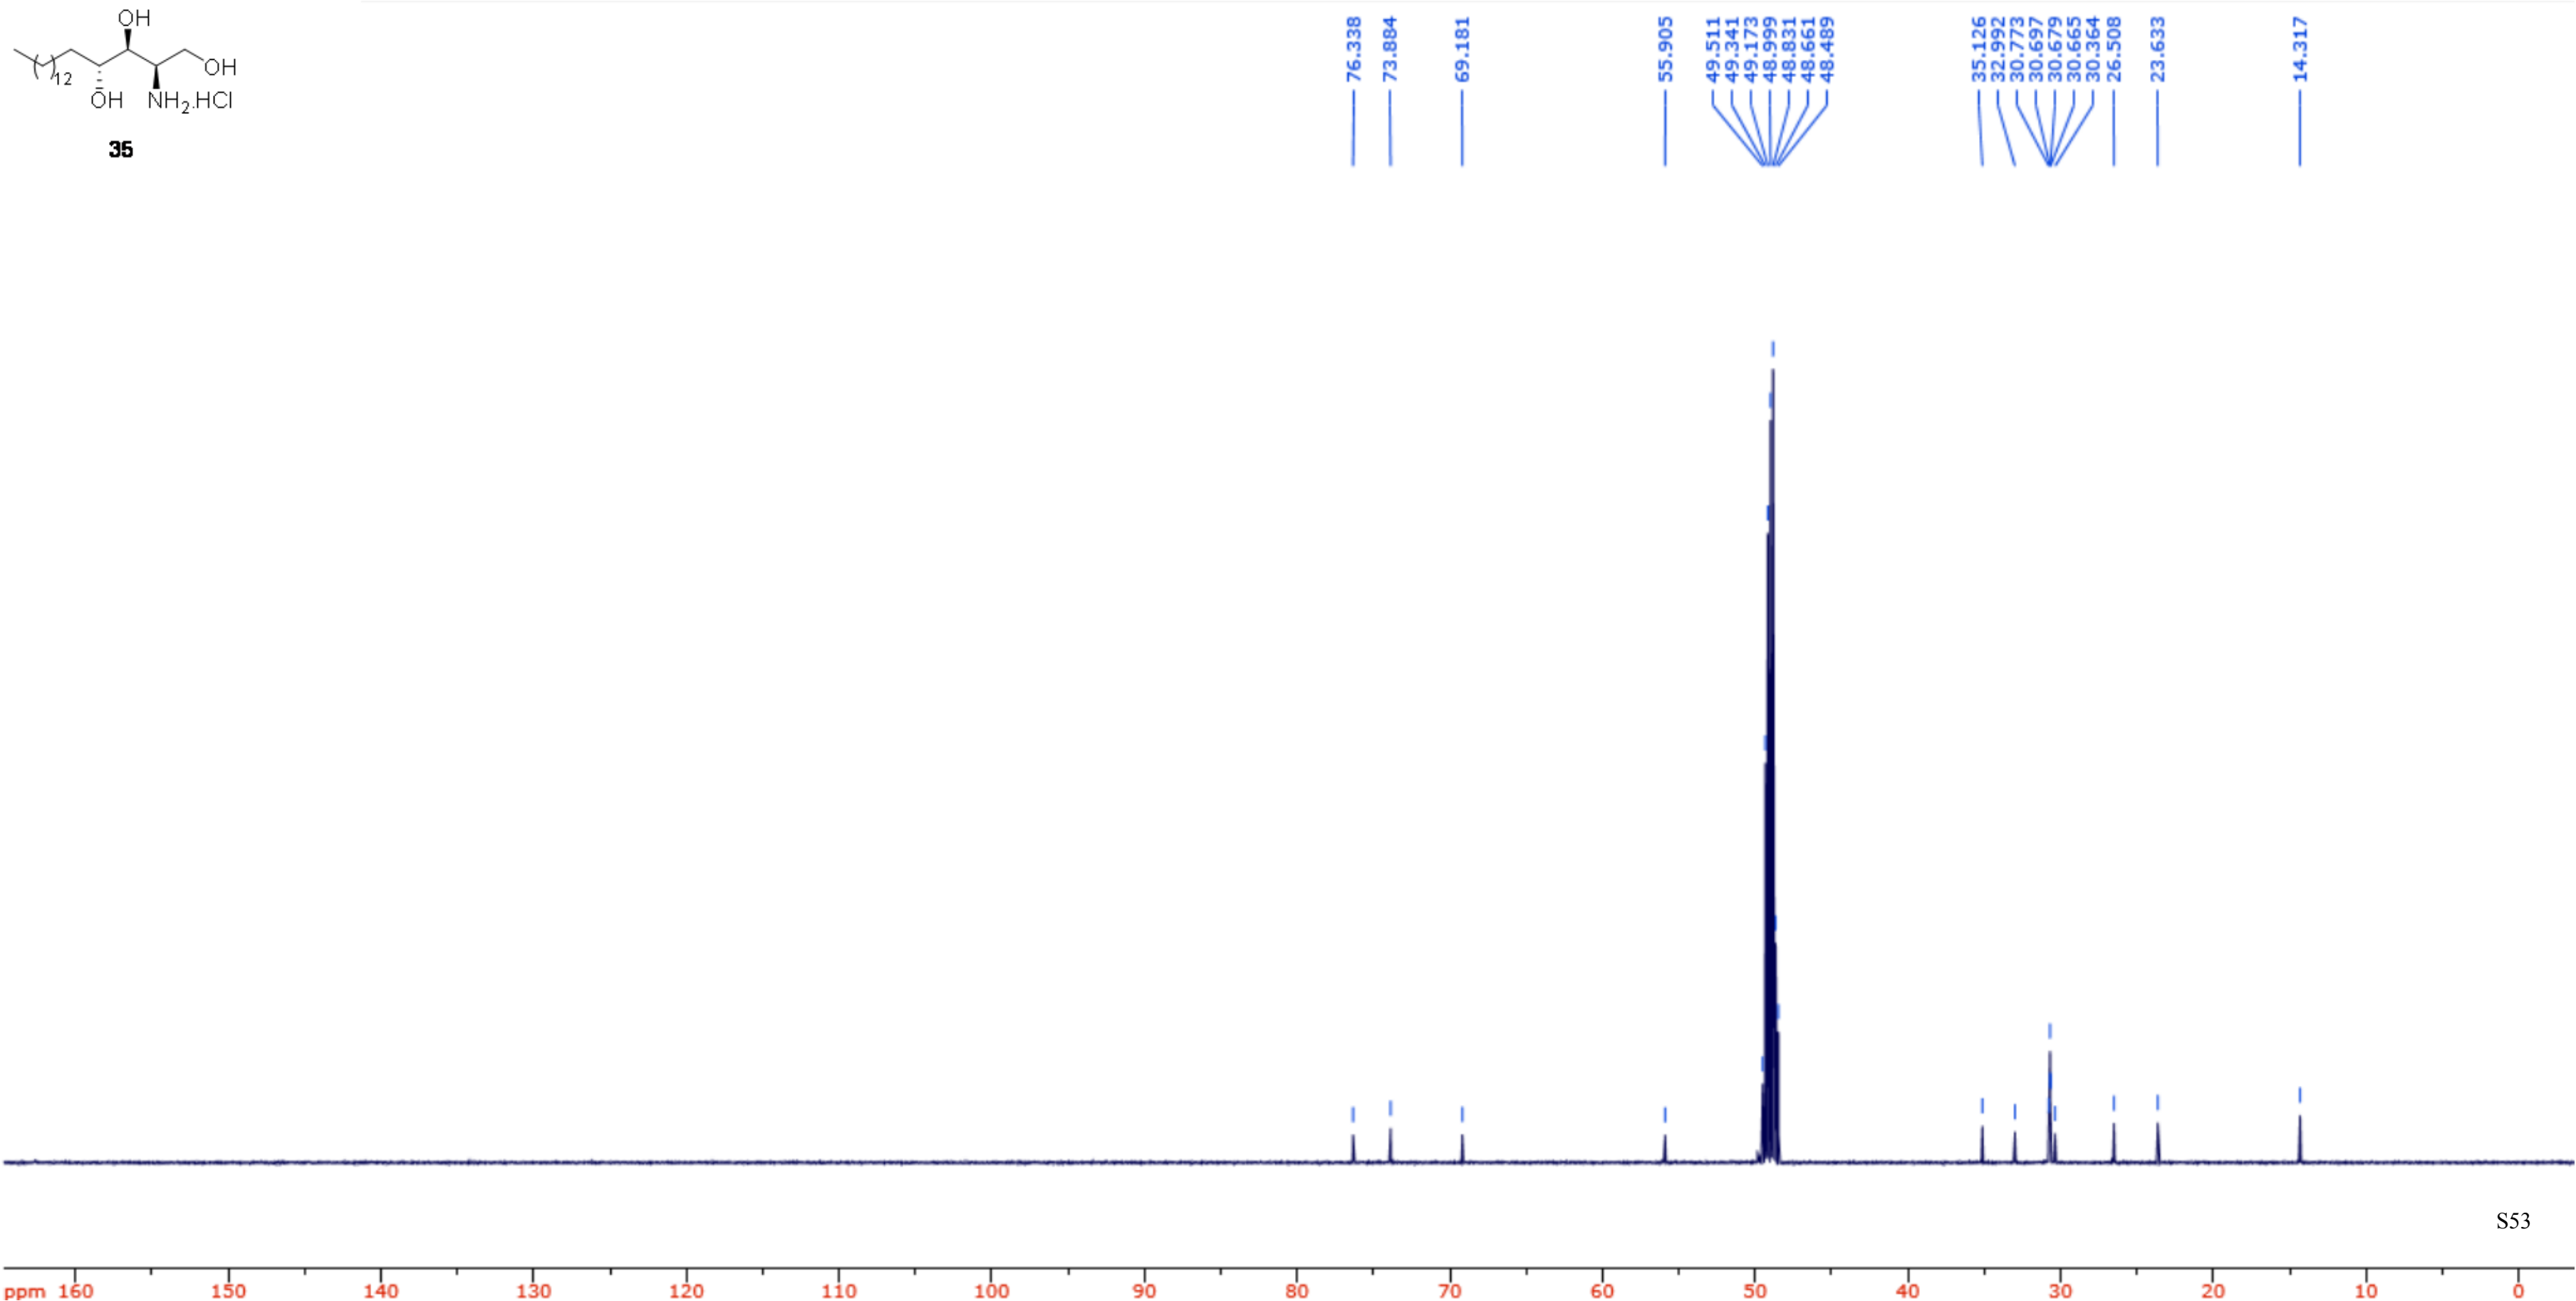

Supplement: jo401211j_si_001.pdf [file jo401211j_si_001.pdf]
